# Supplementary material for: Asymmetric systematic synthesis, structures, and (chir)optical properties of a series of dihetero[8]helicenes
Source: PubMed Central journal article supplement (PMC8179410; doi:10.1039/d1sc00044f), 2021-01-29
Supplement: SC-012-D1SC00044F-s001.pdf [file SC-012-D1SC00044F-s001.pdf]

# Asymmetric Systematic Synthesis, Structures, and (Chir)optical Properties of a Series of Dihetero[8]helicenes

Tomoyuki Yanagi, Takayuki Tanaka, Hideki Yorimitsu

*Department of Chemistry, Graduate School of Science, Kyoto University, Sakyo-ku, Kyoto 606-8502,  
Japan.*

yori@kuchem.kyoto-u.ac.jp

Note added after first publication: 23/02/2021. On page S27, the value of b [Å] for structure (*P*)-**6S** has  
been corrected.

## Table of Contents

|                                                         |        |
|---------------------------------------------------------|--------|
| 1. Instrumentation and Chemicals                        | S2–3   |
| 2. Synthetic Procedure and Characterization             | S3–15  |
| 3. HPLC Trace                                           | S15–20 |
| 4. X-Ray Crystallographic Details                       | S21–28 |
| 5. Racemization Experiments and Theoretical Calculation | S29–35 |
| 6. Optical Measurement                                  | S36–44 |
| 7. Reference                                            | S45    |
| 8. XYZ Coordinates and Energies                         | S46–65 |
| 9. NMR Spectra                                          | S66–89 |

## 1. Instrumentation and Chemicals

$^1\text{H}$  NMR (600 MHz) and  $^{13}\text{C}$  NMR (151 MHz) spectra were recorded on a JEOL ECZ-600 spectrometer. Chemical shifts in  $^1\text{H}$  NMR spectra were recorded in delta ( $\delta$ ) units, parts per million (ppm) relative to residual  $\text{CHCl}_3$  ( $\delta = 7.26$  ppm),  $\text{CD}_3\text{COCHD}_2$  ( $\delta = 2.05$  ppm), and  $\text{CD}_3\text{SOCHD}_2$  ( $\delta = 2.50$  ppm). Chemical shifts in  $^{13}\text{C}$  NMR spectra were recorded in delta ( $\delta$ ) units, parts per million (ppm) relative to  $\text{CDCl}_3$  ( $\delta = 77.16$  ppm),  $\text{CD}_3\text{COCD}_3$  ( $\delta = 29.84$  ppm), and  $\text{CD}_3\text{SOCD}_3$  ( $\delta = 39.52$  ppm). The following abbreviations are used for spin multiplicity: s = singlet, d = doublet, t = triplet, q = quartet, m = multiplet, br = broad. High resolution mass spectra (HRMS) were obtained on a Bruker micrOTOF II-KR spectrometer in Atmospheric Pressure Chemical Ionization (APCI) method using “LC/MS tuning mix, for APCI, low concentration” (Agilent Technologies, Inc.) as the internal standard and Electrospray Ionization (ESI) method using “LC/MS tuning mix, for ESI, low concentration” (Agilent Technologies, Inc.) as the internal standard. UV/Vis absorption spectra were recorded on a Shimadzu UV-1800 spectrometer. Fluorescence spectra were measured on a Shimadzu RF-5300PC spectrometer. Absolute fluorescence quantum yields were determined by a photon-counting method by using an integration sphere on Hamamatsu Photonics C9920-02 spectrometer. Fluorescence lifetime was recorded on a Hamamatsu Photonics Quantaaurus-Tau C11367. CD (Circular Dichroism) spectra were measured on a JASCO J-1500 CD Spectrometer. CPL (Circular polarized luminescence) spectra were measured on a JASCO CPL200 Spectrophotometer. For all spectroscopic studies, spectroscopic grade solvents were used as purchased unless otherwise noted. Optical rotation was measured on a JASCO DIP-1000 digital polarimeter. HPLC analysis was performed on a Shimadzu HPLC unit (LC-20AD, SIL-20A, CTO-20A, SPD M20A). X-ray data were taken at  $-180$  °C with a Rigaku XtaLAB P-200 system by using graphite monochromatic Cu-K $\alpha$  radiation ( $\lambda = 1.54187$  Å). The structures were solved by using direct method SIR-97 and refined by SHELXL-2014/7 program.<sup>1</sup>

All non-aqueous reactions were carried out under an inert atmosphere of  $\text{N}_2$  gas in oven-dried glassware unless otherwise noted. Dehydrated solvents, 1,4-dioxane, dichloromethane, and toluene, were purchased from FUJIFILM Wako Pure Chemical Corporation and stored under nitrogen atmosphere. Dehydrated THF was purchased from Kanto Chemical Co., Inc. and stored under nitrogen atmosphere. 1,3-Dimethyl-2-imidazolidinone (DMI) was purchased from common commercial suppliers and distilled before use. Tetraglyme was purchased from FUJIFILM Wako Pure Chemical Corporation and stored under nitrogen atmosphere in the presence of MS4A after removal of oxygen by nitrogen bubbling. All other reagents were commercially available and used without further purification unless otherwise noted. Analytical

thin layer chromatography (TLC) was performed on Merck precoated analytical plates, 0.25-mm thick, silica gel 60 F<sub>254</sub>. Preparative flash chromatography was performed using Silica Gel (Wakosil<sup>®</sup> C-300 purchased from FUJIFILM Wako Pure Chemical Corporation and Alumina (activated 200 purchased from Nacalai Tesque, Inc.).

All calculations were carried out using the Gaussian 16 program<sup>2</sup> and GRRM 17 program<sup>3</sup> associated with Gaussian16 program. Geometry optimizations and frequency calculations were conducted using B3LYP-D3(BJ) as a functional. Calculated frequencies were used to verify the nature of all stationary points as either minima (no imaginary frequencies) or transition states (one imaginary frequency). IRC calculations were performed to further confirm whether the transition state is connected to the corresponding intermediates. Images were created using the CYLview software.<sup>4</sup>

## 2. Synthetic Procedure and Characterization

### Synthesis of bissulfide **2**: Acid-catalyzed dehydrative sulfanylation

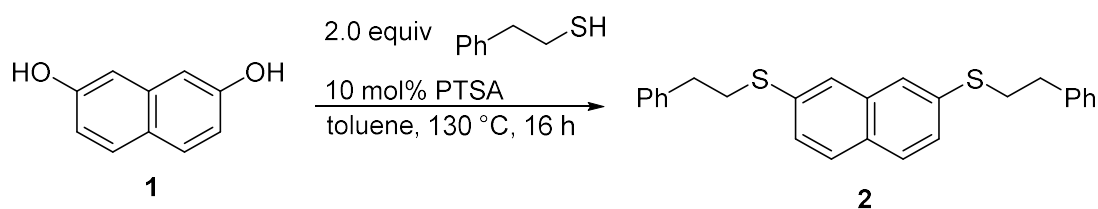

A modified procedure of the reported method was used.<sup>5</sup> A 100-mL Schlenk flask was charged with 2,7-dihydroxynaphthalene (14.4 g, 90 mmol), *p*-toluenesulfonic acid monohydrate (1.70 g, 9.0 mmol), 2-phenylethanethiol (25.0 mL, 180 mmol), and toluene (90 mL). The mixture was stirred at 130 °C for 27 h and cooled to room temperature. The reaction mixture was diluted with dichloromethane (50 mL), passed through a pad of neutral alumina (eluent: dichloromethane), and concentrated under reduced pressure to give 2,7-bis(2-phenylethylsulfanyl)naphthalene **2** as an orange solid with little impurities. This crude sulfide was used for the next step without further purification.

<sup>1</sup>H NMR (CDCl<sub>3</sub>): δ 7.71 (d, *J* = 7.5 Hz, 2H), 7.64 (d, *J* = 1.4 Hz, 2H), 7.39 (dd, *J* = 7.5, 1.4 Hz, 2H), 7.32 (t, *J* = 7.5 Hz, 4H), 7.24 (t, *J* = 7.5 Hz, 6H), 3.28 (t, *J* = 7.5 Hz, 4H), 2.99 (t, *J* = 7.5 Hz, 4H).

<sup>13</sup>C NMR (CDCl<sub>3</sub>): δ 140.2, 135.1, 134.3, 130.1, 128.7, 128.7, 128.4, 127.0, 126.7, 125.7, 35.7, 35.0

HRMS (APCI-MS, positive): *m/z* [*M*]<sup>+</sup> Calcd for C<sub>26</sub>H<sub>24</sub>S<sub>2</sub>: 400.1314; Found: 400.1331.

### Synthesis of bissulfoxide 3: Oxidation of bissulfide 2

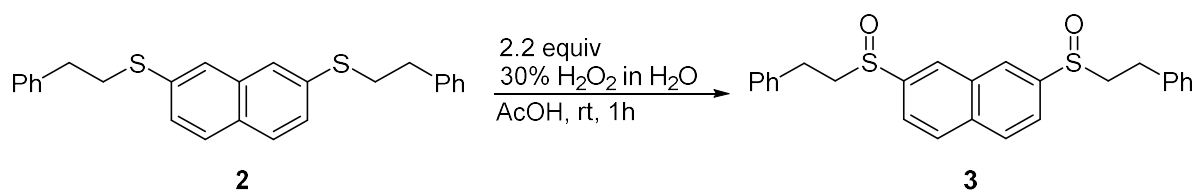

The crude sulfide **2** obtained above (ca. 90 mmol) was dissolved in AcOH (180 mL), and aqueous 30% H<sub>2</sub>O<sub>2</sub> (22.4 mL, 198 mmol) was added to the solution slowly via a dropping funnel. The resulting solution was stirred at room temperature, and the progress of the oxidation was checked by TLC. After completion of the reaction, the mixture was poured into water (300 mL) and extracted with CH<sub>2</sub>Cl<sub>2</sub> (100 mL × 3). The combined organic layer was washed with water (300 mL). To the organic layer, water (100 mL) was added again. Na<sub>2</sub>CO<sub>3</sub> (solid) were then added until AcOH in the organic layer was completely neutralized, and remaining H<sub>2</sub>O<sub>2</sub> was quenched by sat. aqueous Na<sub>2</sub>S<sub>2</sub>O<sub>3</sub> (30 mL). After the phase separation, the organic layer was dried over Na<sub>2</sub>SO<sub>4</sub> and concentrated under reduced pressure to give 2,7-bis(phenethylsulfinyl)naphthalene **3** (37 g, ca. 85 mmol) as an orange solid with a little impurities. This crude sulfoxide was used for the next step without further purification.

<sup>1</sup>H NMR (CDCl<sub>3</sub>): δ 8.23 (s, 2H), 8.00 (d, *J* = 8.2 Hz, 2H), 7.68 (d, *J* = 8.2 Hz, 2H), 7.22 (t, *J* = 7.5 Hz, 4H), 7.16–7.12 (m, 6H), 3.18–3.05 (m, 6H), 2.88–2.84 (m, 2H)

<sup>13</sup>C NMR (CDCl<sub>3</sub>): δ 142.6, 138.3, 135.1, 132.2, 129.5, 128.6, 128.4, 126.6, 124.9, 121.6, 57.7, 27.9.

Although bissulfoxide **3** was obtained as a mixture of diastereomers (*cis*- and *trans*-isomer), they are almost not distinguishable by <sup>1</sup>H and <sup>13</sup>C NMR due to overlapping.

HRMS (APCI-MS, positive): *m/z* [*M*+*H*]<sup>+</sup> Calcd for C<sub>26</sub>H<sub>25</sub>O<sub>2</sub>S<sub>2</sub>: 433.1290; Found: 433.1284.

### Synthesis of ternaphthalene 4: Double arylation of bissulfoxide 3

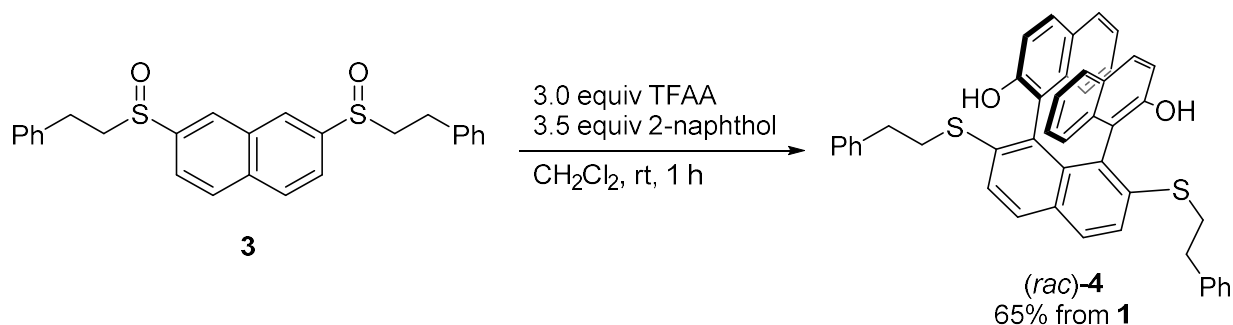

A modified procedure of the reported method was used.<sup>5</sup> A 2-L flask was charged with the obtained crude sulfoxide **3** (37 g, ca. 85 mmol), 2-naphthol (42.8 g, 298 mmol), and CH<sub>2</sub>Cl<sub>2</sub>

(1.7 L, normal grade). Trifluoroacetic anhydride (35.7 mL, 255 mmol) was then slowly added to the solution at 25 °C via a drop funnel, and the resulting mixture was stirred for 1 h at room temperature. After completion of the reaction, ca. 1.3 L of dichloromethane was removed by a rotary evaporator. *n*-Hexane (200 mL) was added to result in formation of white precipitation of **4**. The precipitation was filtered, washed with *n*-hexane, and dried under reduced pressure at 80 °C to give ternaphthalene **4** (39.9 g, 58.2 mmol, 65% from **1**) as a white solid.

**<sup>1</sup>H NMR (CDCl<sub>3</sub>):** δ 8.06 (d, *J* = 8.2 Hz, 2H), 7.61 (d, *J* = 8.2 Hz, 4H), 7.28 (t, *J* = 8.2 Hz, 2H), 7.25–7.23 (m, 4H), 7.21–7.15 (m, 6H), 7.08 (d, *J* = 8.2 Hz, 4H), 6.97 (d, *J* = 8.2 Hz, 2H), 6.18 (d, *J* = 8.2 Hz, 2H), 4.03 (s, 2H), 3.03–2.99 (m, 4H), 2.73–2.70 (m, 4H).

**<sup>13</sup>C NMR (CDCl<sub>3</sub>):** 150.2, 141.9, 140.3, 135.2, 132.9, 130.8, 130.7, 129.3, 128.8, 128.6, 128.5, 127.9, 126.8, 126.6, 125.9, 124.5, 123.2, 122.9, 119.0, 116.7, 35.5, 33.6.

**HRMS (APCI-MS, positive):** *m/z* [*M*]<sup>+</sup> Calcd for C<sub>46</sub>H<sub>36</sub>O<sub>2</sub>S<sub>2</sub>: 684.2151; Found: 684.2131.

#### Synthesis of bisulfonate ester **4'**: Introduction of chiral auxiliaries

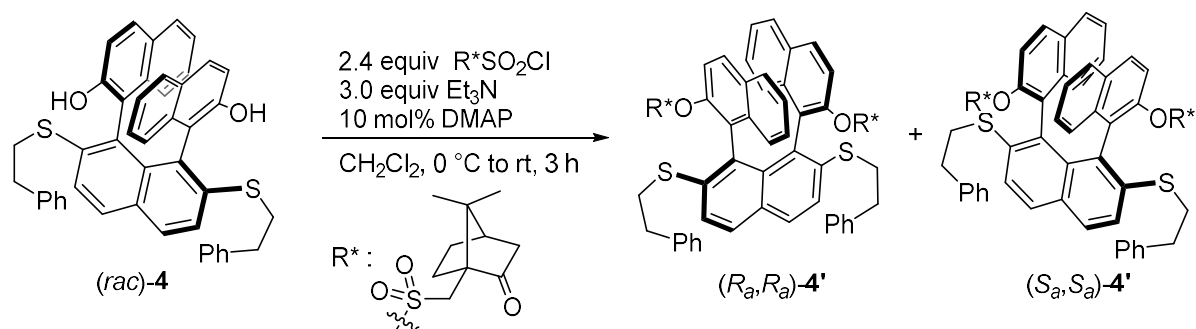

A 100-mL flask was charged with **4** (4.10 g, 6.00 mmol), Et<sub>3</sub>N (2.49 mL, 18.0 mmol), DMAP (73.3 mg, 0.60 mmol), and CH<sub>2</sub>Cl<sub>2</sub> (100 mL). To the solution, (*1S*)-(+)-10-camphorsulfonyl chloride (3.60 g, 12 mmol) in CH<sub>2</sub>Cl<sub>2</sub> (20 mL) was slowly added at 0 °C. The resulting mixture was allowed to warm up to room temperature and stirred for 3 h. Aqueous HCl (3 M, 100 mL) was then added, and the resulting biphasic solution was extracted with CH<sub>2</sub>Cl<sub>2</sub> (50 mL × 3). The combined organic layer was dried over Na<sub>2</sub>SO<sub>4</sub> and concentrated under reduced pressure. The crude mixture was purified by column chromatography on silica gel (eluent: toluene : *n*-*n*-hexane : EtOAc = 10:10:3) to provide (*R<sub>a</sub>*,*R<sub>a</sub>*)-**4'** (R<sub>f</sub>: 0.31, 3.05 g, 2.74 mmol, 46%, d.r. > 20:1, [α]<sub>D</sub><sup>26</sup> = +92.0 (c = 0.39, CHCl<sub>3</sub>)) as a white solid and (*S<sub>a</sub>*,*S<sub>a</sub>*)-**4'** (R<sub>f</sub>: 0.21, 2.93 g, 2.63 mmol, 44%, d.r. > 20:1, [α]<sub>D</sub><sup>26</sup> = −63.4 (c = 0.45, CHCl<sub>3</sub>)) as a white solid.

(*R<sub>a</sub>*,*R<sub>a</sub>*)-**4'**

**<sup>1</sup>H NMR (CDCl<sub>3</sub>):** δ 7.94 (d, *J* = 8.2 Hz, 2H), 7.69–7.67 (m, 2H), 7.56 (d, *J* = 8.9 Hz, 2H), 7.52–7.50 (m, 2H), 7.40–7.36 (m, 4H), 7.22 (t, *J* = 7.2 Hz, 4H), 7.16 (t, *J* = 7.2 Hz, 2H), 7.10 (d, *J* = 6.9 Hz, 4H), 6.95 (d, *J* = 8.9 Hz, 2H), 6.31 (d, *J* = 8.9 Hz, 2H), 3.23 (d, *J* = 15.1 Hz, 2H), 3.18–3.13 (m, 2H), 3.03–2.98 (m, 2H), 2.77–2.72 (m, 4H), 2.32 (d, *J* = 15.1 Hz, 2H), 2.28 (dt, *J* = 18.5, 3.8 Hz, 2H), 2.09–2.04 (m, 2H), 1.99 (t, *J* = 4.5 Hz, 2H), 1.90–1.86 (m, 2H), 1.80 (d, *J* = 18.5 Hz, 2H), 1.27–1.21 (m, 4H), 0.94 (s, 6H), 0.73 (s, 6H).

**<sup>13</sup>C NMR (CDCl<sub>3</sub>):** δ 213.9, 144.9, 140.6, 140.3, 135.7, 132.1, 130.4, 130.3, 129.8, 128.6, 128.6, 128.1, 127.9, 127.8, 127.7, 127.5, 126.5, 126.4, 126.0, 123.0, 119.8, 58.2, 48.9, 47.7, 43.1, 42.5, 35.4, 34.2, 27.0, 25.1, 20.1, 19.7.

**HRMS (APCI-MS, positive):** *m/z* [*M*]<sup>+</sup> Calcd for C<sub>66</sub>H<sub>64</sub>O<sub>8</sub>S<sub>4</sub>: 1112.3479; Found: 1112.3466.

(*S<sub>a</sub>*,*S<sub>a</sub>*)-**4'**

**<sup>1</sup>H NMR (CDCl<sub>3</sub>):** δ 8.01 (d, *J* = 8.9 Hz, 2H), 7.73 (t, *J* = 4.8 Hz, 2H), 7.56 (d, *J* = 8.9 Hz, 2H), 7.53–7.52 (m, 2H), 7.40–7.37 (m, 4H), 7.24 (t, *J* = 7.5 Hz, 4H), 7.18 (t, *J* = 7.2 Hz, 2H), 7.11 (d, *J* = 7.5 Hz, 4H), 6.96 (d, *J* = 9.6 Hz, 2H), 6.28 (d, *J* = 8.9 Hz, 2H), 3.16 (td, *J* = 11.8, 5.5 Hz, 2H), 2.94 (td, *J* = 11.8, 5.7 Hz, 2H), 2.84–2.79 (m, 4H), 2.72–2.68 (m, 2H), 2.64 (d, *J* = 14.4 Hz, 2H), 2.29 (dt, *J* = 18.3, 3.9 Hz, 2H), 2.26–2.21 (m, 2H), 2.00 (t, *J* = 4.5 Hz, 2H), 1.95–1.90 (m, 2H), 1.85 (d, *J* = 18.5 Hz, 2H), 1.38–1.29 (m, 4H), 0.95 (s, 6H), 0.74 (s, 6H).

**<sup>13</sup>C NMR (CDCl<sub>3</sub>):** δ 214.0, 145.3, 140.3, 139.6, 135.8, 131.8, 130.5, 130.4, 130.2, 128.6, 128.5, 128.1, 128.0, 127.9, 127.5, 127.5, 126.6, 126.4, 126.0, 123.0, 120.0, 58.0, 48.6, 47.8, 42.8, 42.5, 35.5, 34.1, 27.0, 24.8, 19.9, 19.6.

**HRMS (APCI-MS, positive):** *m/z* [*M*]<sup>+</sup> Calcd for C<sub>66</sub>H<sub>64</sub>O<sub>8</sub>S<sub>4</sub>: 1112.3479; Found: 1112.3468.

#### Synthesis of enantio-enriched **4**: Removal of chiral auxiliaries of **4'**

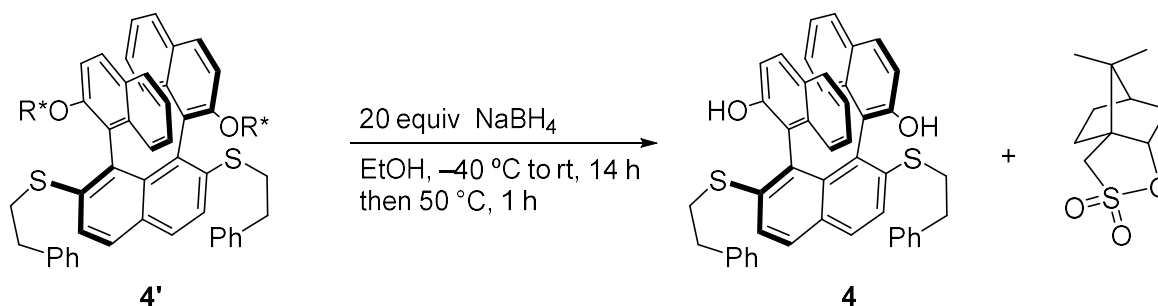

Synthesis of (*S<sub>a</sub>*,*S<sub>a</sub>*)-**4** is representative. A modified procedure of the reported method was used.<sup>6</sup> A 50-mL flask was charged with (*S<sub>a</sub>*,*S<sub>a</sub>*)-**4'** (3.52 g, 3.17 mmol) and EtOH (60 mL). To the solution, NaBH<sub>4</sub> (2.40 g, 63 mmol) was added slowly at –40 °C. The resulting mixture was allowed to warm up to room temperature and stirred for 14 h at room temperature and 1 h at

50 °C. Aqueous sat. NH<sub>4</sub>Cl (10 mL) and water (10 mL) were then added. The precipitates were filtered off and washed by water (10 mL) and *n*-hexane (10 mL). The crude mixture was purified by column chromatography on silica gel (eluent: toluene/EtOAc = 10:1) to provide (*S,S*)-**4** (1.45 g, 2.1 mmol, 67%, >99%ee, [α]<sub>D</sub><sup>25</sup> = −123 (c = 0.21, CHCl<sub>3</sub>)) as a white solid. The <sup>1</sup>H NMR spectrum of (*S<sub>a</sub>S<sub>a</sub>*)-**4** is identical to that of (*rac*)-**4**.

Desulfonylation of (*R,R*)-**4'** was also performed according to the same procedure to afford (*R<sub>a</sub>R<sub>a</sub>*)-**4** (820 mg, 1.20 mmol, 69%, >99%ee, [α]<sub>D</sub><sup>25</sup> = +95.0 (c = 0.20, CHCl<sub>3</sub>)) from (*R<sub>a</sub>R<sub>a</sub>*)-**4'** (1.94 g, 1.74 mmol).

### Synthesis of **5**: Oxidation of sulfanyl moieties of **4**

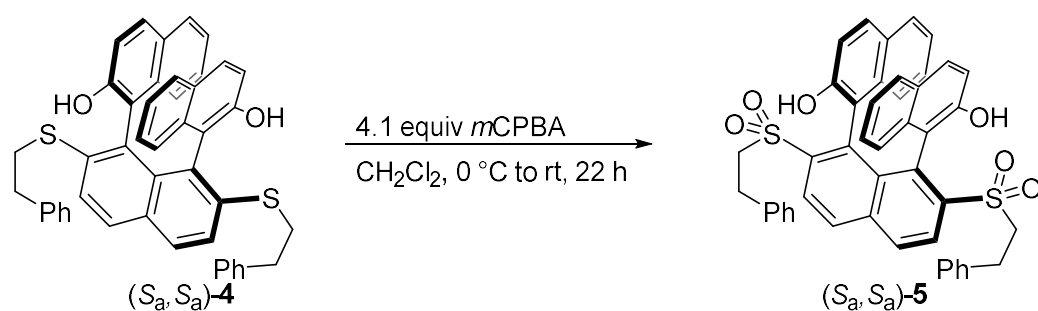

Synthesis of (*S<sub>a</sub>S<sub>a</sub>*)-**5** is representative. A 100-mL flask was charged with (*S<sub>a</sub>S<sub>a</sub>*)-**4** (1.03 g, 1.5 mmol) and CH<sub>2</sub>Cl<sub>2</sub> (30 mL). To the solution, *m*CPBA (ca. 70%, stabilized by water, 1.50 g, ca. 6.1 mmol) was added slowly at 0 °C. The resulting solution was stirred at the same temperature for 10 min and at room temperature for 22 h. After completion of the reaction, sat. aqueous NaHCO<sub>3</sub> (60 mL) and sat. aqueous Na<sub>2</sub>S<sub>2</sub>O<sub>3</sub> (20 mL) were added. The resulting biphasic mixture was extracted with CH<sub>2</sub>Cl<sub>2</sub> (50 mL × 3). The combined organic layer was washed with brine and dried over Na<sub>2</sub>SO<sub>4</sub>. The solution was concentrated under reduced pressure. The crude mixture was purified by column chromatography on silica gel (eluent: CH<sub>2</sub>Cl<sub>2</sub>: EtOAc=10:1) to afford (*S<sub>a</sub>S<sub>a</sub>*)-**5** as a pale yellow solid (711 mg 0.95 mmol, 63%, [α]<sub>D</sub><sup>25</sup> = +181 (c = 0.22, CHCl<sub>3</sub>)).

(*R<sub>a</sub>R<sub>a</sub>*)-**5** and (*rac*)-**5** were synthesized according to the same procedure.

(*R<sub>a</sub>R<sub>a</sub>*)-**5** was obtained as a pale yellow solid (698 mg, 0.93 mmol, 62%, [α]<sub>D</sub><sup>25</sup> = −183 (c = 0.18, CHCl<sub>3</sub>)) from (*S<sub>a</sub>S<sub>a</sub>*)-**4** (1.03 g, 1.5 mmol).

(*rac*)-**5** was obtained as a pale yellow solid (1.10 g, 1.46 mmol, 73%) from (*rac*)-**4** (1.37 g, 2.0 mmol).

**<sup>1</sup>H NMR (CDCl<sub>3</sub>):** δ 8.67 (d, *J* = 8.9 Hz, 2H), 8.42 (d, *J* = 8.9 Hz, 2H), 7.72 (d, *J* = 8.9 Hz, 2H), 7.43 (d, *J* = 8.9 Hz, 2H), 7.28 (d, *J* = 8.9 Hz, 2H), 7.07–7.01 (m, 8H), 6.36–6.34 (m, 6H), 6.31 (d, *J* = 8.9 Hz, 2H), 4.55 (s, 2H), 2.61 (td, *J* = 13.0, 4.8 Hz, 2H), 2.42 (td, *J* = 13.0, 4.8 Hz, 2H), 2.34 (td, *J* = 13.0, 4.8 Hz, 2H), 2.18 (td, *J* = 13.0, 4.8 Hz, 2H).

**<sup>13</sup>C NMR (CDCl<sub>3</sub>):** δ 151.0, 142.4, 139.1, 138.5, 136.9, 135.9, 134.4, 131.1, 131.0, 129.2, 128.8, 128.5, 128.4, 127.9, 126.8, 126.7, 124.4, 124.1, 119.9, 118.0, 55.1, 28.0.

**HRMS (APCI-MS, positive):** *m/z* [*M*]<sup>+</sup> Calcd for C<sub>46</sub>H<sub>36</sub>O<sub>6</sub>S<sub>2</sub>: 748.1948; Found: 748.1945.

### Synthesis of **6O**: Base-mediated cyclization of **5**

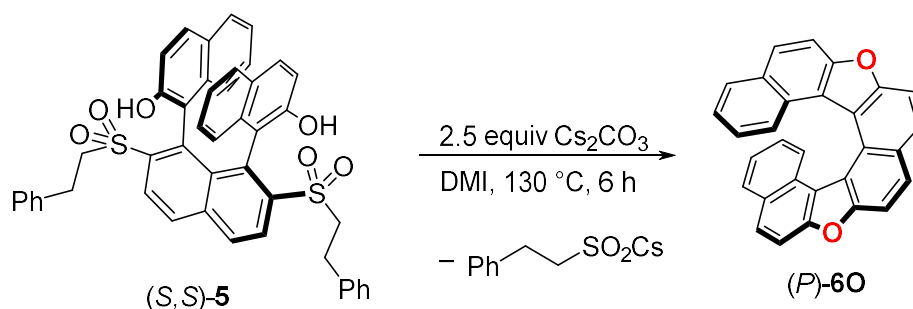

Synthesis of (*P*)-**6O** is a representative. A modified procedure of the reported method was used.<sup>5</sup> A 20-mL Schlenk tube was charged with (*S<sub>a</sub>,S<sub>a</sub>*)-**5** (449 mg, 0.60 mmol), Cs<sub>2</sub>CO<sub>3</sub> (487 mg, 1.5 mmol), and DMI (12 mL). The resulting solution was stirred at room temperature for 10 min and at 130 °C for 6 h. After completion of the reaction, aqueous sat. NH<sub>4</sub>Cl (10 mL) and water (100 mL) were added, and the resulting mixture was extracted with EtOAc/ *n*-hexane (ratio ca. 5:1, 30 mL × 3). The combined organic layer was washed with water and brine, dried over Na<sub>2</sub>SO<sub>4</sub>, and concentrated under reduced pressure. The crude mixture was purified by column chromatography on silica gel (eluent: *n*-hexane: CH<sub>2</sub>Cl<sub>2</sub> = 10:1) to afford (*P*)-**6O** as a white solid (151 mg, 0.37 mmol, 62%, 84%ee), which showed <sup>1</sup>H NMR and <sup>13</sup>C NMR spectra identical to the reported ones.<sup>5</sup> Recrystallization from CH<sub>2</sub>Cl<sub>2</sub>/ *n*-hexane increased the optical purity of the filtrate (125 mg, 97%ee, [α]<sub>D</sub><sup>22</sup> = +1560 (c = 0.10, CHCl<sub>3</sub>)) due to higher crystallinity of the racemate (The precipitate: 27 mg, 21%ee).

(*R<sub>a</sub>,R<sub>a</sub>*)-**5** and (*rac*)-**5** were synthesized according to the same procedure.

(*M*)-**6O** was obtained as a white solid (154 mg, 0.38 mmol, 63%, 83%ee from with (*S<sub>a</sub>,S<sub>a</sub>*)-**5** (449 mg, 0.60 mmol). Recrystallization from CH<sub>2</sub>Cl<sub>2</sub>/ *n*-hexane increased the optical purity of the filtrate (106 mg, 97%ee, [α]<sub>D</sub><sup>22</sup> = -1495 (c = 0.10, CHCl<sub>3</sub>)).

(*rac*)-**6O** was obtained as a white solid (30.5 mg, 0.074 mmol, 56%) from (*rac*)-**6SO<sub>2</sub>** (100 mg, 0.13 mmol).



For the chiroptical measurements, the enantiopure sample was prepared by preparative chiral HPLC. (Column: DAICEL CHIRALPAK IA (20 mm × 250 mm), Eluent: *n*-Hexane/dichloromethane= 4:1, Flow rate: 6.0 mL/min, Detection: 254 nm, Retention time:  $t_1=15.3$  min,  $t_2=17.8$  min.)

#### Synthesis of 7: Deprotection of the thiol moieties of 4

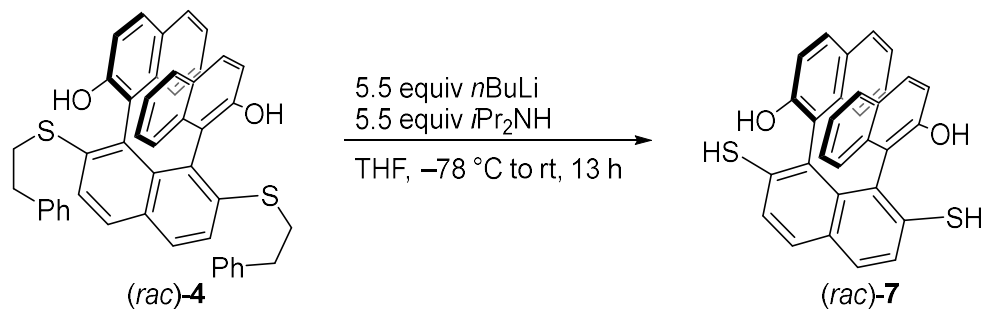

Synthesis of (*rac*)-7 is representative. A 200-mL two-necked flask was charged with diisopropylamine (7.7 mL, 55 mmol) and THF (55 mL). To the solution, *n*BuLi (1.6 M in *n*-hexane, 34 mL, 55 mmol) was added slowly at  $-78\text{ }^\circ\text{C}$ . The resulting solution was stirred at the same temperature for 10 min and at  $0\text{ }^\circ\text{C}$  for 10 min. Ternaphthalene 4 (6.84 g, 10.0 mmol) was then added portionwise at  $-78\text{ }^\circ\text{C}$ . The resulting mixture was stirred for 10 min at the same temperature and for 13 h at room temperature. After completion of the reaction, sat. aqueous  $\text{NH}_4\text{Cl}$  (60 mL) was added, and the resulting biphasic solution was extracted with EtOAc (100 mL × 3). The combined organic layer was washed with brine, dried over  $\text{Na}_2\text{SO}_4$ . The solution was concentrated under reduced pressure to ca. 30 mL, and precipitation was then filtered and washed with diethyl ether to afford bithiol 7 (4.34 g, 9.1 mmol, 91%) as a pale yellow solid. (*R<sub>a</sub>,R<sub>a</sub>*)-7 and (*S<sub>a</sub>,S<sub>a</sub>*)-7 were synthesized according to the same procedure.

(*S,S*)-7 was obtained as a pale yellow solid (1.06 g, quantitative yield,  $[\alpha]_{\text{D}}^{19} = +121$  ( $c = 0.20$ ,  $\text{CHCl}_3$ )) from (*S<sub>a</sub>,S<sub>a</sub>*)-4 (1.43 g, 2.12 mmol).

(*R,R*)-7 was obtained as a pale yellow solid (552 mg, 1.16 mmol, 97%,  $[\alpha]_{\text{D}}^{26} = -132$  ( $c = 0.20$ ,  $\text{CHCl}_3$ )) from (*R<sub>a</sub>,R<sub>a</sub>*)-4 (821 mg, 1.20 mmol).

**$^1\text{H NMR}$  ( $\text{CDCl}_3$ ):**  $\delta$  7.90 (d,  $J = 8.9$  Hz, 2H), 7.57–7.54 (m, 4H), 7.26 (t,  $J = 6.9$  Hz, 2H), 7.20 (t,  $J = 7.5$  Hz, 2H), 7.10 (d,  $J = 8.9$  Hz, 2H), 6.98 (d,  $J = 8.2$  Hz, 2H), 6.13 (d,  $J = 8.9$  Hz, 2H), 4.02 (s, 2H), 3.16 (s, 2H).

**$^{13}\text{C NMR}$  ( $\text{CDCl}_3$ ):**  $\delta$  150.0, 138.4, 135.6, 132.2, 131.7, 130.6, 129.5, 128.8, 127.9, 127.0, 126.3, 125.6, 124.3, 123.5, 119.2, 116.8.

**HRMS** (APCI-MS, positive):  $m/z$   $[M]^+$  Calcd for  $\text{C}_{30}\text{H}_{20}\text{O}_2\text{S}_2$ : 476.0899; Found: 476.0901.

### Synthesis of 6S: Acid-mediated cyclization of bithiol of 7

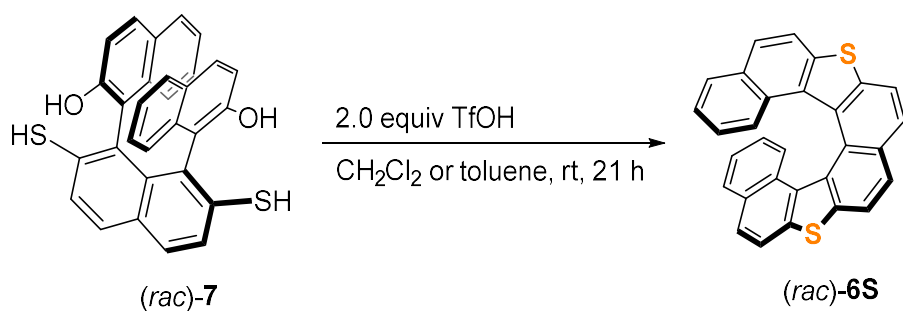

Synthesis of *(rac)*-6S is representative. A 200-mL two-necked flask was charged with bithiol 7 (4.34 g, 9.1 mmol) and CH<sub>2</sub>Cl<sub>2</sub> (90 mL). TfOH (1.6 mL, 18 mmol) was then added at 0 °C, and the resulting mixture was stirred for 21 h at room temperature. The reaction mixture was then diluted with CH<sub>2</sub>Cl<sub>2</sub> (100 mL), passed through a pad of neutral alumina (eluent: CH<sub>2</sub>Cl<sub>2</sub>), and concentrated under reduced pressure to afford *(rac)*-6S as a pale yellow solid (3.10 g, 7.0 mmol, 77%). Samples for optical measurements were purified by recrystallization from CH<sub>2</sub>Cl<sub>2</sub>/ *n*-hexane.

*(P)*-6S and *(M)*-6S were synthesized according to the same procedure using toluene as a solvent instead of CH<sub>2</sub>Cl<sub>2</sub>.

*(P)*-6S was obtained as a pale yellow solid (767 mg, 1.74 mmol, 87%, >99%ee, [α]<sub>D</sub><sup>33</sup> = +1940 (c = 0.10, CHCl<sub>3</sub>)) from *(S<sub>a</sub>,S<sub>a</sub>)*-7 (952 mg, 2.0 mmol).

*(M)*-6S was obtained as a pale yellow solid (393 mg, 0.89 mmol, 89%, >99%ee, [α]<sub>D</sub><sup>33</sup> = -1840 (c = 0.11, CHCl<sub>3</sub>)) from *(R<sub>a</sub>,R<sub>a</sub>)*-7 (476 mg, 1.0 mmol).

<sup>1</sup>H NMR (DMSO-*d*<sub>6</sub>): δ 8.48 (d, *J* = 8.2 Hz, 2H), 8.41 (d, *J* = 8.2 Hz, 2H), 8.06 (d, *J* = 8.2 Hz, 2H), 7.62 (d, *J* = 8.2 Hz, 2H), 7.43 (d, *J* = 8.2 Hz, 2H), 6.92 (t, *J* = 8.2 Hz, 2H), 6.40 (d, *J* = 8.2 Hz, 2H), 6.19 (t, *J* = 8.2 Hz, 2H).

<sup>13</sup>C NMR (DMSO-*d*<sub>6</sub>): δ 138.0, 135.6, 132.5, 130.5, 129.5, 129.1, 128.2, 127.3, 127.1, 126.4, 124.6, 123.9, 122.9, 122.7, 120.6, 120.1.

HRMS (APCI-MS, positive): *m/z* [*M*]<sup>+</sup> Calcd for C<sub>30</sub>H<sub>16</sub>S<sub>2</sub>: 440.0688; Found: 440.0710.

### Synthesis of 6SO<sub>2</sub>: Oxidation of 6S

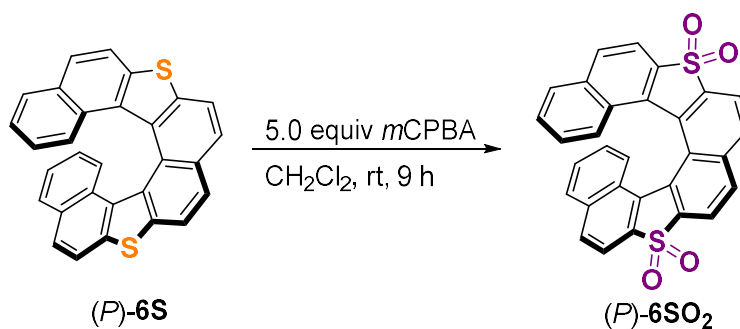

Synthesis of  $(P)\text{-6SO}_2$  is representative. A 100-mL flask was charged with  $(P)\text{-6S}$  (739 mg, 1.73 mmol) and  $\text{CH}_2\text{Cl}_2$  (70 mL). To the solution,  $m\text{CPBA}$  (ca. 70%, stabilized by water, 2.13 g, ca. 8.7 mmol) was added slowly at 0 °C. The resulting solution was stirred at the same temperature for 10 min and at room temperature for 9 h. After completion of the reaction, sat. aqueous  $\text{NaHCO}_3$  (60 mL) and sat. aqueous  $\text{Na}_2\text{S}_2\text{O}_3$  (20 mL) were added. The resulting biphasic mixture was extracted with  $\text{CH}_2\text{Cl}_2$  (50 mL  $\times$  3). The combined organic layer was washed with brine and dried over  $\text{Na}_2\text{SO}_4$ . The solution was passed through a pad of neutral alumina and silica gel (eluent  $\text{CH}_2\text{Cl}_2$ ) and concentrated under reduced pressure to afford  $(P)\text{-6SO}_2$  as an orange solid (855 mg, 1.69 mmol, 98%, >99%ee,  $[\alpha]_{\text{D}}^{33} = +858$  (c = 0.098,  $\text{CHCl}_3$ )). Samples for optical measurement were purified by recrystallization ( $\text{CH}_2\text{Cl}_2/\text{EtOAc}$ ). Dithiahelicene tetraoxide ( $M$ )- $\text{6SO}_2$  was synthesized according to the same procedure and obtained as an orange solid (552 mg, 1.10 mmol, 99%, >99%ee,  $[\alpha]_{\text{D}}^{33} = -964$  (c = 0.11,  $\text{CHCl}_3$ )) from ( $M$ )- $\text{6S}$  (480 mg, 1.09 mmol).

$(rac)\text{-6SO}_2$  was synthesized according to the procedure shown below.

A 200-mL flask equipped with a reflux condenser was charged with  $(rac)\text{-6S}$  (2.2 g, 5.0 mmol) and  $\text{AcOH}$  (40 mL). 30% aqueous  $\text{H}_2\text{O}_2$  (6.0 mL, ca. 53 mmol) was added slowly, and the resulting mixture was stirred at 120 °C (bath temp.) for 16 h. After completion of the reaction, the mixture was cooled to room temperature. The formed precipitate was filtered, washed with  $\text{Et}_2\text{O}$ , and dried under reduced pressure to afford  $(rac)\text{-6SO}_2$  (2.34 g, 4.6 mmol, 93%) as an orange solid. The obtained product contains little impurity, which was used for the next steps without further purification due to very poor solubility (enantio-enriched  $\text{6SO}_2$  showed much better solubility than racemic  $\text{6SO}_2$ ). For optical measurements, a part of the obtained product was purified by column chromatography on silica gel (eluent:  $\text{CH}_2\text{Cl}_2$ ).

**<sup>1</sup>H NMR (DMSO-*d*<sub>6</sub>):** δ 8.59 (d, *J* = 8.2 Hz, 2H), 8.39 (d, *J* = 8.2 Hz, 2H), 7.84 (d, *J* = 8.2 Hz, 2H), 7.80 (d, *J* = 8.2 Hz, 2H), 7.62 (d, *J* = 8.2 Hz, 2H), 7.54 (d, *J* = 8.2 Hz, 2H), 7.21 (t, *J* = 8.2 Hz, 2H), 6.82 (t, *J* = 8.2, 2H).

**<sup>13</sup>C NMR (DMSO-*d*<sub>6</sub>):** δ 140.1, 138.5, 134.9, 133.4, 133.0, 132.3, 131.2, 130.4, 127.8, 127.6, 127.2, 126.6, 124.4, 124.0, 119.3, 116.1.

**HRMS (APCI-MS, positive):** *m/z* [*M*]<sup>+</sup> Calcd for C<sub>30</sub>H<sub>16</sub>O<sub>4</sub>S<sub>2</sub>: 504.0485; Found: 504.0494.

### Synthesis of 6N: Atom-substitution by amine via sequential 4-fold S<sub>N</sub>Ar reactions

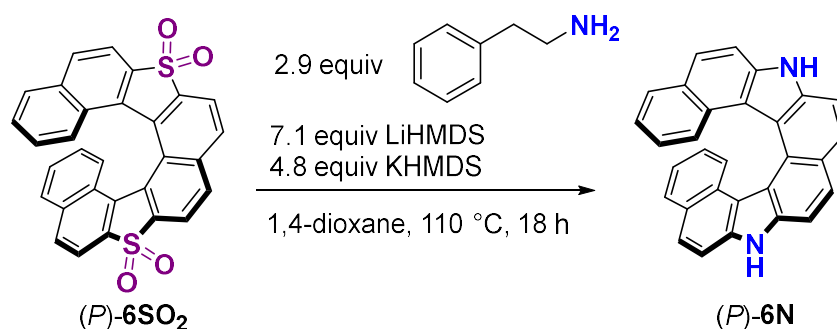

Synthesis of (*P*)-6N is representative. A modified procedure of the reported method was used.<sup>7</sup> A 10-mL Schlenk tube was charged with (*P*)-6SO<sub>2</sub> (212 mg, 0.42 mmol), 2-phenylethylamine (0.15 mL, 1.2 mmol), LiHMDS (498 mg, 3.0 mmol), and 1,4-dioxane (5.0 mL). The mixture was stirred at 110 °C for 6 h. KHMDS (398 mg, 2.0 mmol) was then added, and the mixture was stirred for an additional 12 h. The reaction was terminated by addition of sat. aqueous NH<sub>4</sub>Cl (5 mL) at room temperature, and the resulting biphasic solution was extracted with CH<sub>2</sub>Cl<sub>2</sub> (5 mL × 3). The combined organic layer was washed with brine, dried over Na<sub>2</sub>SO<sub>4</sub>, and concentrated under reduced pressure. The residue was purified by column chromatography on silica gel (eluent: *n*-hexane: EtOAc = 3:1) to provide (*P*)-6N (39.1 mg, 0.096 mmol, 23%, 77%*ee*) as a pale yellow solid. Recrystallization from CH<sub>2</sub>Cl<sub>2</sub>/*n*-hexane afforded the enantiopure product (16.2 mg, >99%*ee*, [α]<sub>D</sub><sup>22</sup> = +1670 (c = 0.030, CHCl<sub>3</sub>)).

(*M*)-6N and (*rac*)-6N were synthesized according to the same procedure.

(*M*)-6N was obtained as a pale yellow solid (40.7 mg, 0.10 mmol, 24%, 76%*ee*) from (*M*)-6SO<sub>2</sub> (512 mg, 0.42 mmol). Recrystallization from CH<sub>2</sub>Cl<sub>2</sub>/*n*-hexane afforded enantiopure product (15.6 mg, >99%*ee*, [α]<sub>D</sub><sup>22</sup> = −1810 (c = 0.050, CHCl<sub>3</sub>)).

(*rac*)-6N was obtained as a pale yellow solid (139 mg, 0.34 mmol, 34%) from (*rac*)-6SO<sub>2</sub> (504 mg, 1.0 mmol) using LiHMDS (1.0 g, 6.0 mmol), KHMDS (1.2 g, 6.0 mmol), and 1,4-dioxane (8.0 mL).

**$^1\text{H}$  NMR (Acetone- $d_6$ ):**  $\delta$  11.37 (s, 2H), 8.13 (d,  $J$  = 8.2 Hz, 2H), 7.94 (d,  $J$  = 8.2 Hz, 2H), 7.89 (d,  $J$  = 8.2 Hz, 2H), 7.73 (d,  $J$  = 8.2 Hz, 2H), 7.48 (d,  $J$  = 8.2 Hz, 2H), 7.28 (d,  $J$  = 8.2 Hz, 2H), 6.76 (t,  $J$  = 8.2 Hz, 2H), 6.20 (t,  $J$  = 8.2 Hz, 2H).

**$^{13}\text{C}$  NMR (Acetone- $d_6$ ):**  $\delta$  139.0, 136.4, 130.9, 129.5, 127.8, 127.3, 126.9, 126.6, 125.6, 125.1, 123.0, 122.5, 121.3, 117.7, 113.4, 110.6.

**HRMS (APCI-MS, positive):**  $m/z$   $[M]^+$  Calcd for  $\text{C}_{30}\text{H}_{18}\text{N}_2$ : 406.1465; Found: 406.1473.

### Synthesis of **6CX**: Atom-substitution by xanthene via sequential 4-fold $\text{S}_{\text{N}}\text{Ar}$ reactions

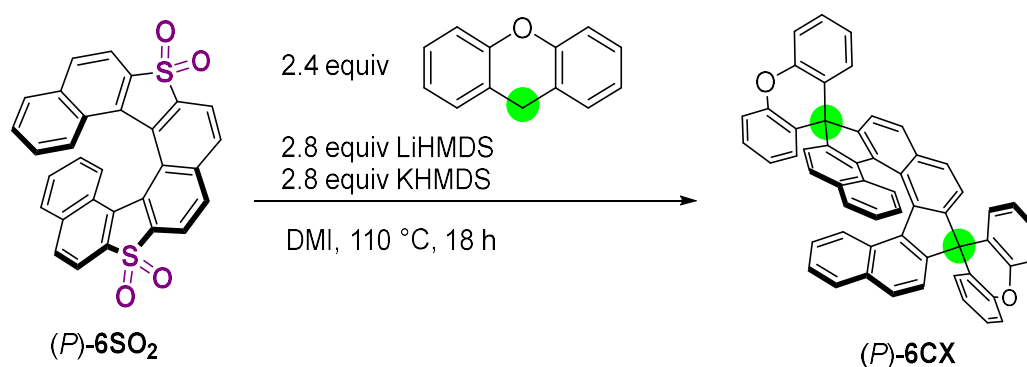

Synthesis of **(P)-6CX** is representative. A Schlenk flask was charged with LiHMDS (149 mg, 0.90 mmol) and DMI (10 mL). To the flask, xanthene (163 mg, 0.90 mmol) and **(P)-6SO<sub>2</sub>** (162 mg, 0.32 mmol) were added sequentially, and the resulting mixture was stirred at 110 °C for 4 h. The reaction mixture was cooled to room temperature, KHMDS (179 mg, 0.90 mmol) was added, and the resulting mixture was again stirred for 14 h at 110 °C. The reaction was quenched with sat. aqueous  $\text{NH}_4\text{Cl}$  (10 mL) at room temperature, and the resulting biphasic solution was extracted with  $\text{CH}_2\text{Cl}_2$  (20 mL  $\times$  3). The combined organic layer was washed with brine, dried over  $\text{Na}_2\text{SO}_4$ , passed through a pad of silica gel (eluent:  $\text{CH}_2\text{Cl}_2$ ), and concentrated under reduced pressure. The crude mixture was purified by column chromatography on silica gel (eluent:  $\text{CH}_2\text{Cl}_2$ : *n*-hexane = 5:1) to give **(P)-6CX** as a yellow solid (137 mg, 0.19 mmol, 58%, 85%ee). Recrystallization from  $\text{CH}_2\text{Cl}_2$ /*n*-hexane afforded the enantiopure product (88.7 mg, >99%ee,  $[\alpha]_{\text{D}}^{22} = -83.2$  ( $c = 0.10$ ,  $\text{CHCl}_3$ )).

**(M)-6CX** and **(rac)-6CX** were synthesized according to the same procedure.

**(M)-6CX**: Obtained as a yellow solid (138 mg, 0.19 mmol, 59%, 87%ee) from **(M)-6SO<sub>2</sub>** (162 mg, 0.32 mmol). Recrystallization from  $\text{CH}_2\text{Cl}_2$ /*n*-hexane afforded the enantiopure product (66.0 mg, >99%ee,  $[\alpha]_{\text{D}}^{24} = +67.0$  ( $c = 0.10$ ,  $\text{CHCl}_3$ )).

(*rac*)-**6CX** was obtained as a yellow solid (136 mg, 0.18 mmol, 56%) from (*rac*)-**6SO<sub>2</sub>** (162 mg, 0.32 mmol).

<sup>1</sup>H NMR (CDCl<sub>3</sub>): δ 7.90 (d, *J* = 8.2 Hz, 2H), 7.86 (d, *J* = 8.2 Hz, 2H), 7.49 (d, *J* = 8.2 Hz, 2H), 7.40 (d, *J* = 8.2 Hz, 2H), 7.38 (dd, *J* = 8.2, 1.6 Hz, 2H), 7.33 (td, *J* = 8.2, 1.6 Hz, 2H), 7.27–7.22 (m, 6H), 7.19 (dd, *J* = 8.2, 1.6 Hz, 2H), 7.14 (td, *J* = 8.2, 1.6 Hz, 2H), 6.99 (t, *J* = 8.2 Hz, 2H), 6.82 (t, *J* = 8.2 Hz, 2H), 6.59 (t, *J* = 8.2 Hz, 2H), 6.40 (td, *J* = 8.2, 1.6 Hz, 2H), 6.11 (dd, *J* = 8.2, 1.6 Hz, 2H).

<sup>13</sup>C NMR (CDCl<sub>3</sub>): δ 155.1, 152.6, 152.2, 152.1, 138.7, 137.2, 135.4, 132.9, 130.0, 128.9, 128.5, 127.5, 127.3, 127.0, 125.4, 124.5, 124.2, 123.9, 123.7, 123.5, 123.0, 122.3, 122.2, 117.6, 117.1 (three sp<sub>2</sub>-hybridized carbons were missing probably due to overlapping), 55.1.

HRMS (APCI-MS, positive): *m/z* [*M*]<sup>+</sup> Calcd for C<sub>56</sub>H<sub>32</sub>O<sub>2</sub>: 736.2397; Found: 736.2407.

#### Synthesis of **6CF**: Atom-substitution by fluorene via sequential 4-fold S<sub>N</sub>Ar reactions

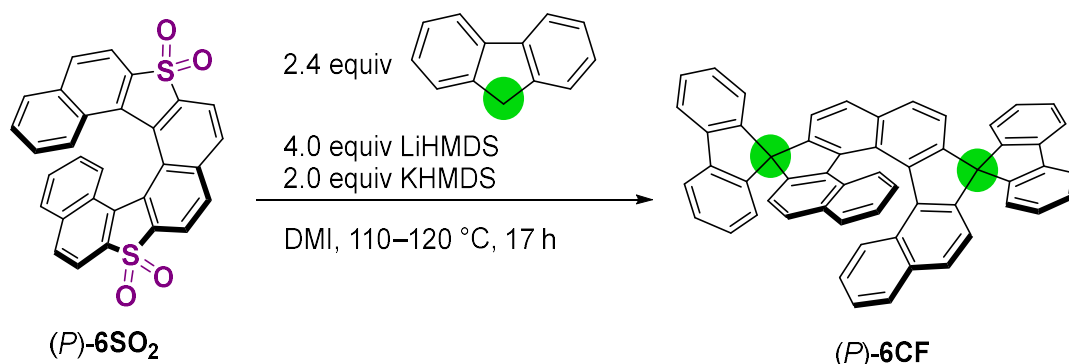

Synthesis of (*P*)-**6CF** is representative. A Schlenk flask was charged with LiHMDS (200 mg, 1.2 mmol) and DMI (3 mL). To the flask, fluorene (122 mg, 0.72 mmol) and (*P*)-**6SO<sub>2</sub>** (151 mg, 0.30 mmol) were added sequentially, and the resulting mixture was stirred at 110 °C for 5 h. The reaction mixture was cooled to room temperature, KHMDS (120 mg, 1.2 mmol) was added, and the resulting mixture was again stirred for 10 h at 110 °C and 2 h at 120 °C. The reaction was quenched with sat. aqueous NH<sub>4</sub>Cl (3 mL) at room temperature, and the resulting biphasic solution was extracted with CH<sub>2</sub>Cl<sub>2</sub> (10 mL × 3). The combined organic layer was washed with brine, dried over Na<sub>2</sub>SO<sub>4</sub>, passed through a pad of silica gel (eluent: CH<sub>2</sub>Cl<sub>2</sub>), and concentrated under reduced pressure. The crude mixture purified by column chromatography on silica gel (eluent: CH<sub>2</sub>Cl<sub>2</sub>: *n*-hexane = 5:1) to (*P*)-**6CF** as a yellow solid (84.2 mg, 0.12 mmol, 40%, 99%ee). Recrystallization from CH<sub>2</sub>Cl<sub>2</sub>/ *n*-hexane afforded the enantiopure product (46.8 mg, >99%ee, [α]<sub>D</sub><sup>24</sup> = −29.8 (c = 0.099, CHCl<sub>3</sub>)).

(*M*)-**6CF** and (*rac*)-**6CF** were synthesized according to the same procedure.

(*M*)-**6CF** was obtained as a yellow solid (83.0 mg, 0.12 mmol, 39%, 98%*ee*) from (*M*)-**6SO<sub>2</sub>** (151 mg, 0.30 mmol). Recrystallization from CH<sub>2</sub>Cl<sub>2</sub>/*n*-hexane afforded the almost enantiopure product (56.4 mg, >99%*ee*, [ $\alpha$ ]<sub>D</sub><sup>23</sup> = +30.0 (c = 0.098, CHCl<sub>3</sub>)).

(*rac*)-**6CF** was obtained as a yellow solid (21.2 mg, 0.030 mmol, 30%) from (*rac*)-**6SO<sub>2</sub>** (50.4 mg, 0.10 mmol).

<sup>1</sup>H NMR (CDCl<sub>3</sub>):  $\delta$  8.13 (d, *J* = 8.2 Hz, 2H), 7.99 (d, *J* = 7.5 Hz, 2H), 7.92 (d, *J* = 7.5 Hz, 2H), 7.74 (d, *J* = 8.2 Hz, 2H), 7.51 (t, *J* = 6.9 Hz, 2H), 7.38 (t, *J* = 7.5 Hz, 2H), 7.34–7.30 (m, 6H), 7.25–7.24 (m, 2H), 7.03 (t, *J* = 6.9 Hz, 2H), 7.00 (d, *J* = 8.2 Hz, 2H), 6.85 (t, *J* = 7.9 Hz, 2H), 6.80 (d, *J* = 8.2 Hz, 2H), 6.55–6.51 (m, 4H).

<sup>13</sup>C NMR (CDCl<sub>3</sub>):  $\delta$  148.5, 147.6, 147.3, 145.2, 142.9, 142.5, 141.4, 138.9, 135.4, 133.0, 129.1, 129.0, 128.3, 128.2, 128.0, 126.8, 125.1, 124.8, 124.3, 124.1, 124.0, 123.8, 122.4, 121.3, 120.9, 120.6, 120.2 (one sp<sub>2</sub>-hybridized carbon was missing probably due to overlapping), 66.9.

HRMS (APCI-MS, positive): *m/z* [*M*]<sup>+</sup> Calcd for C<sub>56</sub>H<sub>32</sub>: 704.2499; Found: 704.2483.

### 3. HPLC trace

#### Compound 4

Column: DAICEL CHIRALPAK IA (4.6 mm × 250 mm), Eluent: *n*-hexane/*i*PrOH = 1:1, Flow rate: 1.4 mL/min, Detection: 300 nm, Retention time: *t*<sub>1</sub> = 8.9 min, *t*<sub>2</sub> = 10.7 min.

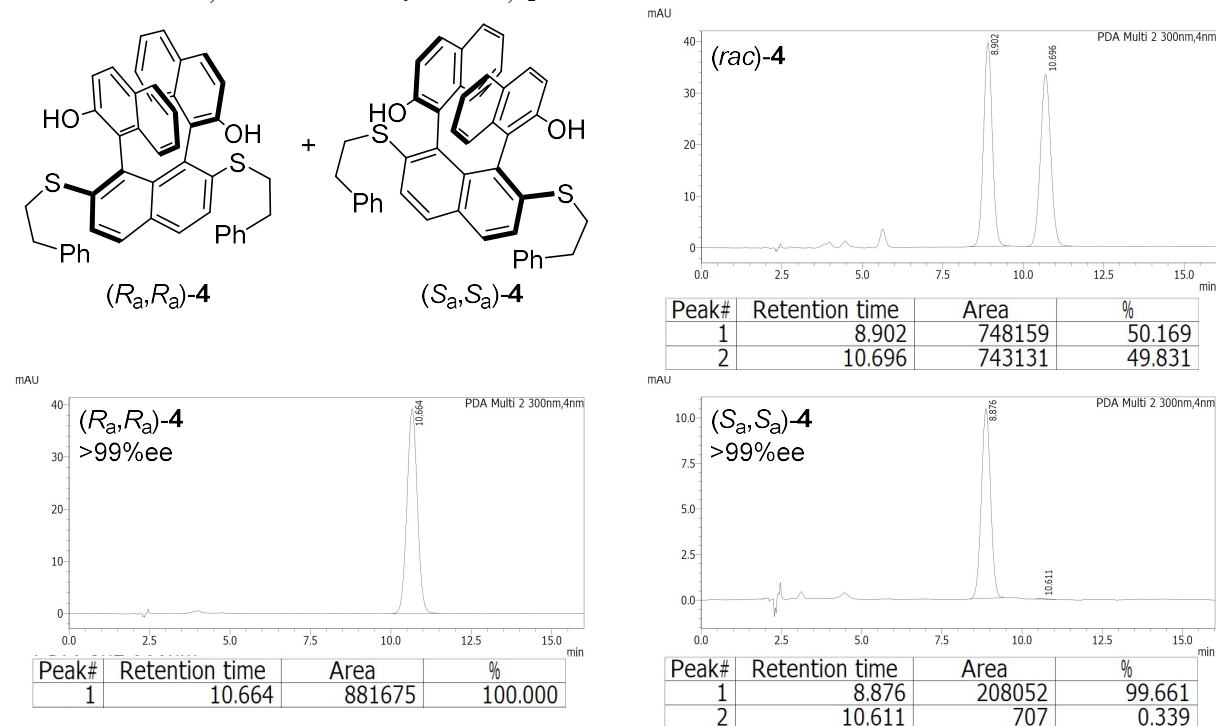

Fig. S1 HPLC chromatograms of **4**.

## Compound 60

Column: DAICEL CHIRALPAK IA (4.6 mm × 250 mm), Eluent: *n*-hexane/*i*PrOH= 100:1, Flow rate: 1.5 ml/min, Detection: 350 nm, Retention time:  $t_1=4.1$  min,  $t_2=5.1$  min.

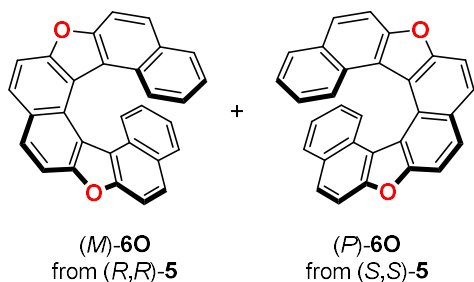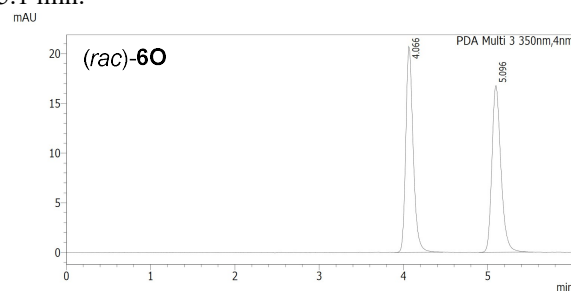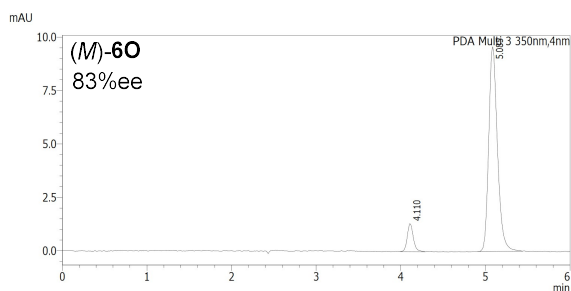

| Peak# | Retention time | Area  | %      |
|-------|----------------|-------|--------|
| 1     | 4.110          | 6491  | 8.658  |
| 2     | 5.085          | 68483 | 91.342 |

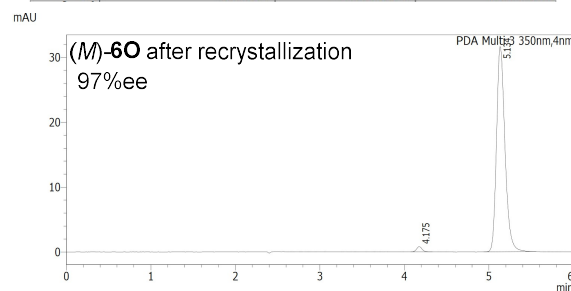

| Peak# | Retention time | Area   | %      |
|-------|----------------|--------|--------|
| 1     | 4.175          | 3715   | 1.660  |
| 2     | 5.134          | 219998 | 98.340 |

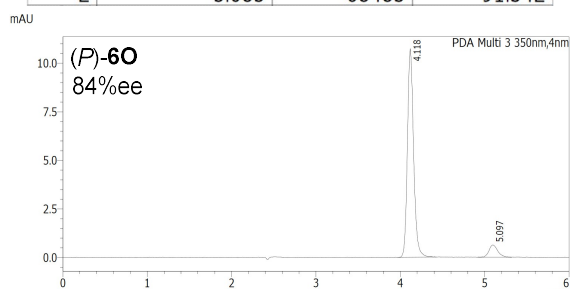

| Peak# | Retention time | Area  | %      |
|-------|----------------|-------|--------|
| 1     | 4.118          | 54326 | 92.146 |
| 2     | 5.097          | 4631  | 7.854  |

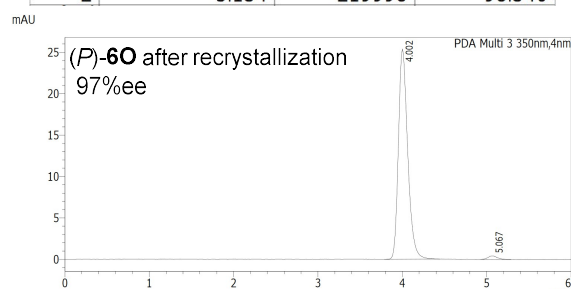

| Peak# | Retention time | Area   | %      |
|-------|----------------|--------|--------|
| 1     | 4.002          | 194567 | 98.266 |
| 2     | 5.067          | 3434   | 1.734  |

Fig. S2 HPLC chromatograms of 60.

## Compound 6S

Column: DAICEL CHIRALPAK IA (4.6 mm × 250 mm), Eluent: *n*-hexane/*i*PrOH= 100:5, Flow rate: 1.0 ml/min, Detection: 300 nm, Retention time:  $t_1=4.6$  min,  $t_2=5.1$  min.

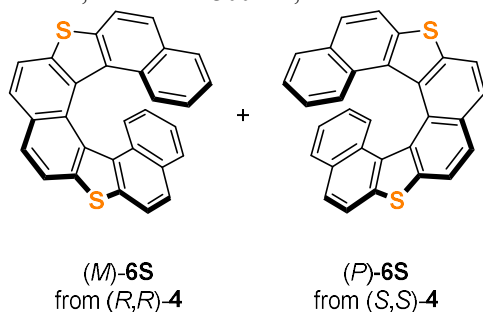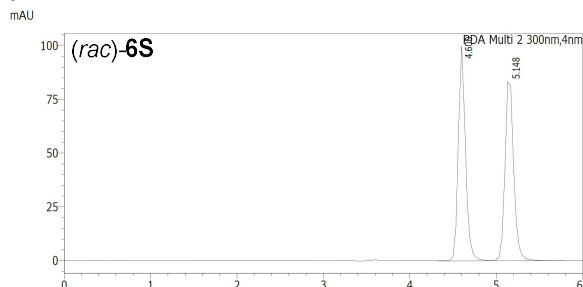

| Peak# | Retention time | Area   | %      |
|-------|----------------|--------|--------|
| 1     | 4.600          | 582203 | 50.016 |
| 2     | 5.148          | 581825 | 49.984 |



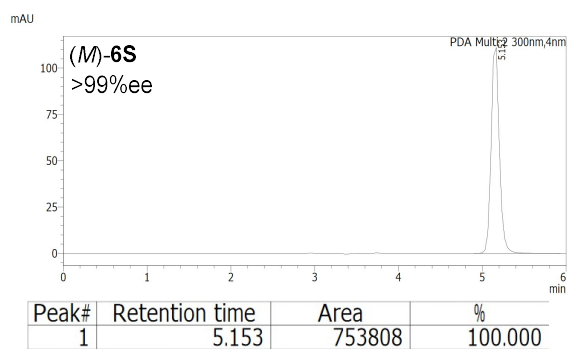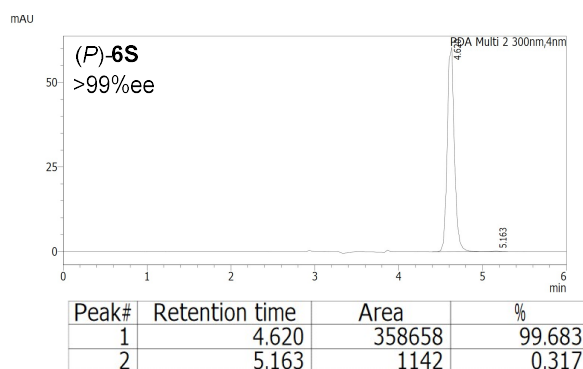

**Fig. S3** HPLC chromatograms of **6S**.

### Compound **6SO<sub>2</sub>**

Column: DAICEL CHIRALPAK IA (4.6 mm × 250 mm), Eluent: *n*-hexane/*i*PrOH = 1:1, Flow rate: 1.0 mL/min, Detection: 300 nm, Retention time:  $t_1=8.3$  min,  $t_2=9.5$  min.

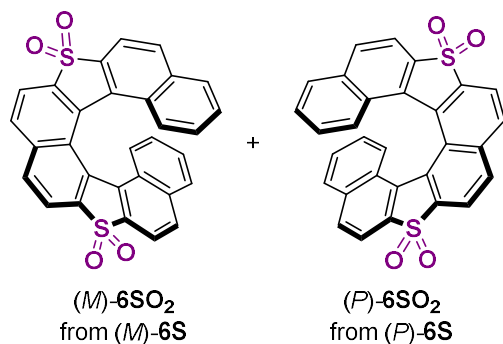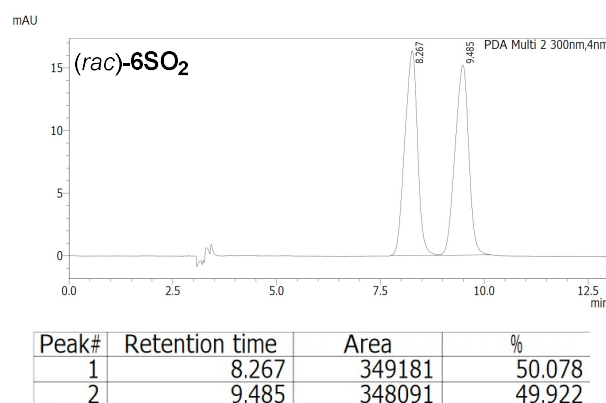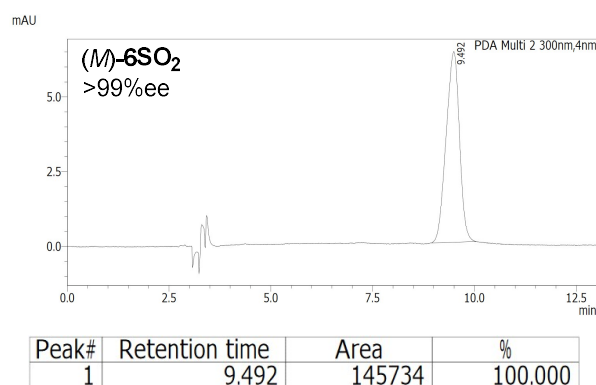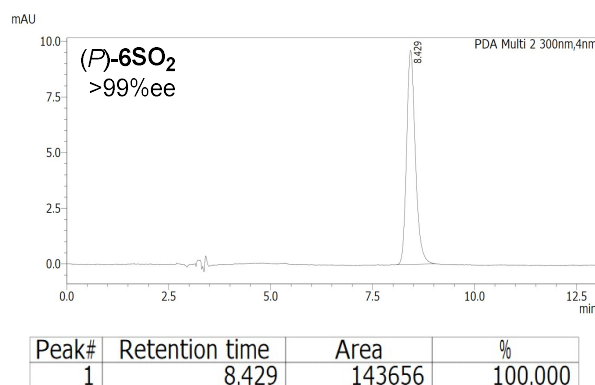

**Fig. S4** HPLC chromatograms of **6SO<sub>2</sub>**.

## Compound 6N

Column: DAICEL CHIRALPAK IC-3 (4.6 mm × 150 mm), Eluent: *n*-hexane:*i*PrOH = 85:15, Flow rate: 1.0 mL/min, Detection: 300 nm, Retention time:  $t_1=6.5$  min,  $t_2=11.9$  min.

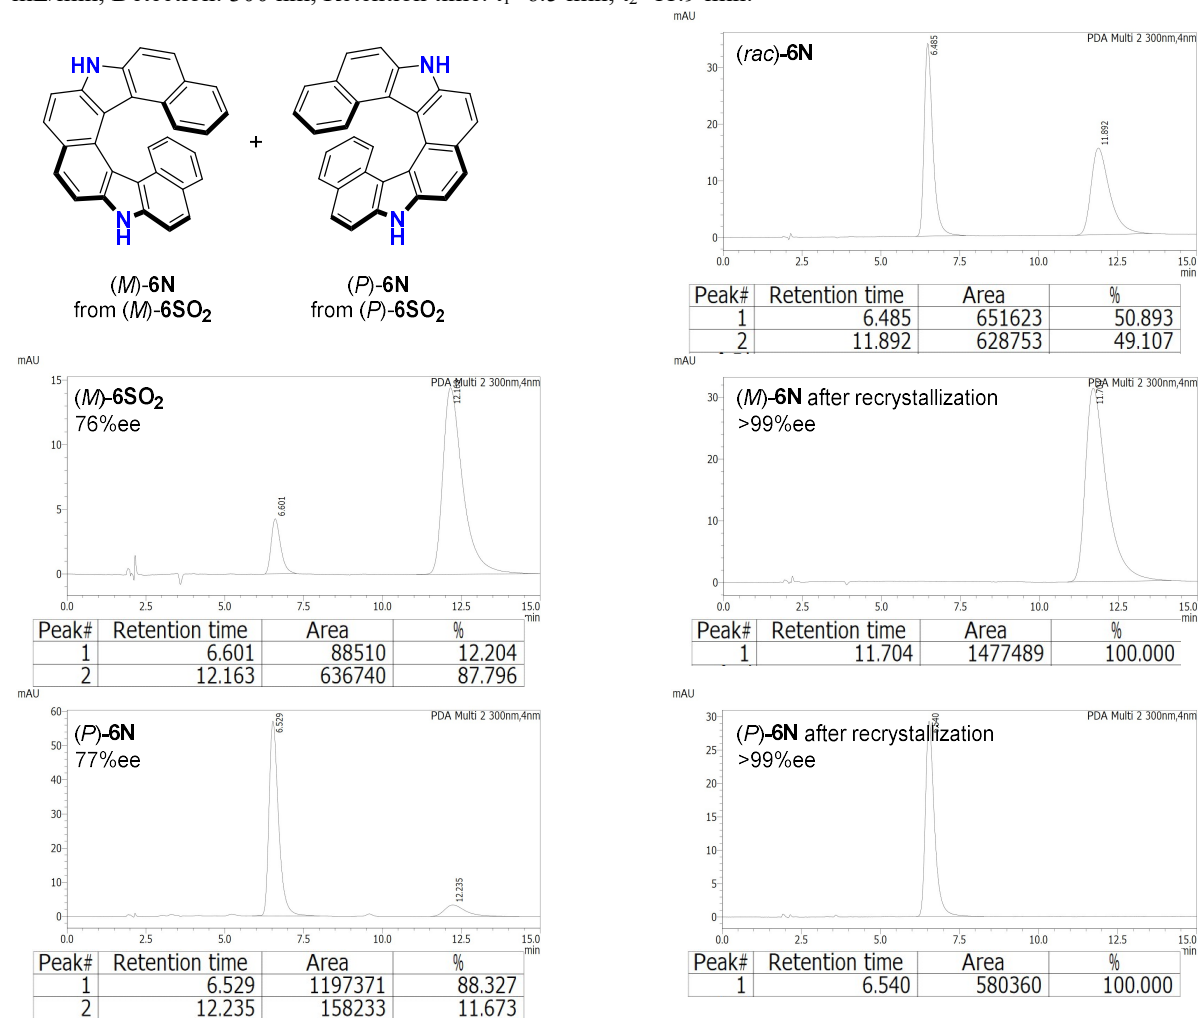

Fig. S5 HPLC chromatograms of 6N.

## Compound 6CX

Column: DAICEL CHIRALPAK AD-H (4.6 mm × 250 mm), Eluent: *n*-hexane:*i*PrOH = 100:3,  
Flow rate: 1.0 mL/min, Detection: 300 nm, Retention time:  $t_1=3.9$  min,  $t_2=4.2$  min.

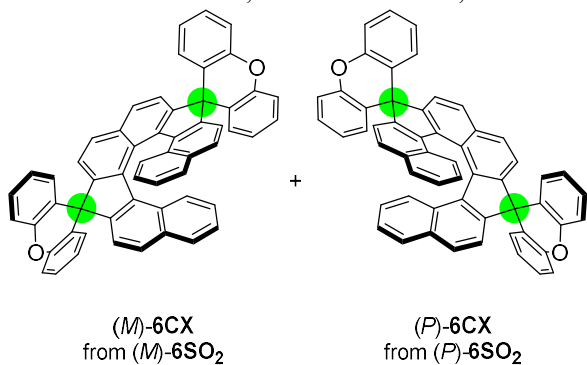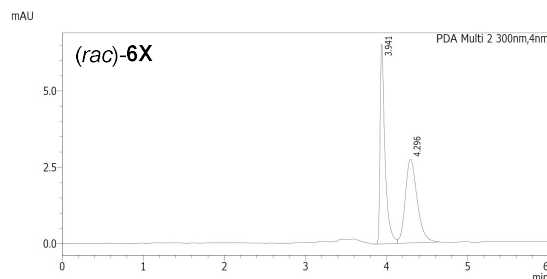

| Peak# | Retention time | Area  | %      |
|-------|----------------|-------|--------|
| 1     | 3.941          | 27426 | 49.737 |
| 2     | 4.296          | 27715 | 50.263 |

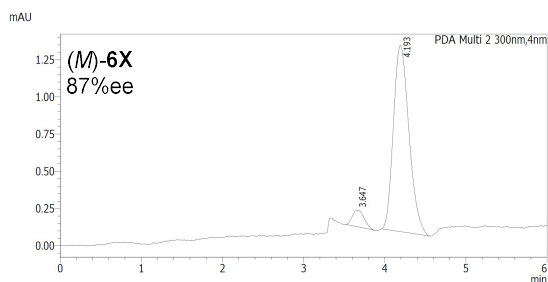

| Peak# | Retention time | Area  | %      |
|-------|----------------|-------|--------|
| 1     | 3.647          | 1127  | 6.299  |
| 2     | 4.193          | 16761 | 93.701 |

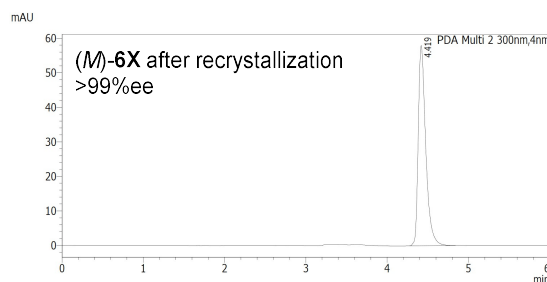

| Peak# | Retention time | Area   | %       |
|-------|----------------|--------|---------|
| 1     | 4.419          | 372164 | 100.000 |

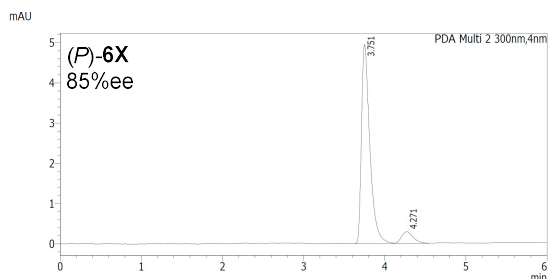

| Peak# | Retention time | Area  | %      |
|-------|----------------|-------|--------|
| 1     | 3.751          | 35400 | 92.351 |
| 2     | 4.271          | 2932  | 7.649  |

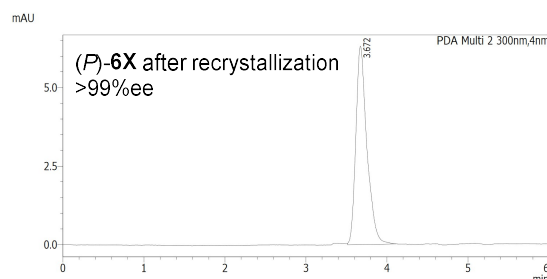

| Peak# | Retention time | Area  | %       |
|-------|----------------|-------|---------|
| 1     | 3.672          | 60060 | 100.000 |

Fig. S6 HPLC chromatograms of 6CX.

## Compound 6CF

Column: DAICEL CHIRALPAK AD-H (4.6 mm × 250 mm), Eluent: *n*-hexane:*i*PrOH = 100:3, Flow rate: 1.0 mL/min, Detection: 300 nm, Retention time:  $t_1=4.2$  min,  $t_2=5.0$  min.

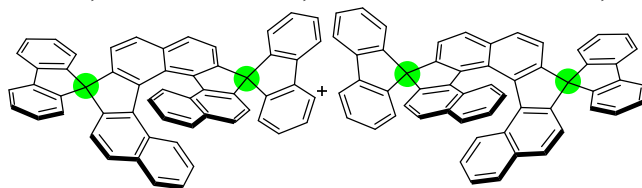

(*M*)-6CF  
from (*M*)-6SO<sub>2</sub>

(*P*)-6CF  
from (*P*)-6SO<sub>2</sub>

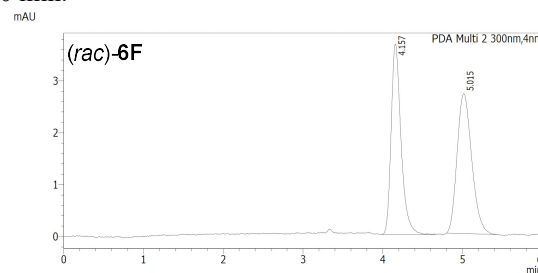

| Peak# | Retention time | Area  | %      |
|-------|----------------|-------|--------|
| 1     | 4.157          | 31596 | 47.813 |
| 2     | 5.015          | 34485 | 52.187 |

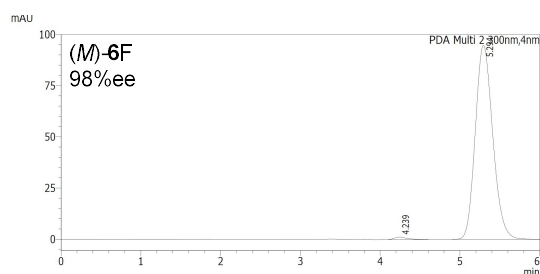

| Peak# | Retention time | Area    | %      |
|-------|----------------|---------|--------|
| 1     | 4.239          | 13445   | 0.923  |
| 2     | 5.294          | 1443130 | 99.077 |

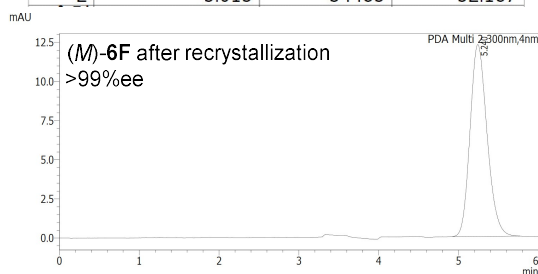

| Peak# | Retention time | Area   | %       |
|-------|----------------|--------|---------|
| 1     | 5.240          | 181704 | 100.000 |

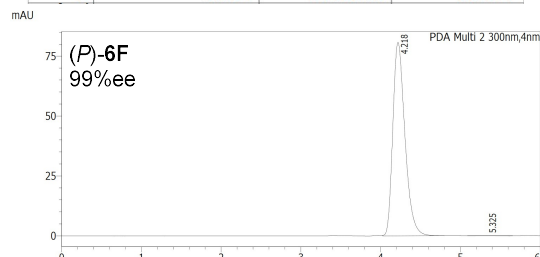

| Peak# | Retention time | Area   | %      |
|-------|----------------|--------|--------|
| 1     | 4.218          | 853629 | 99.863 |
| 2     | 5.325          | 1172   | 0.137  |

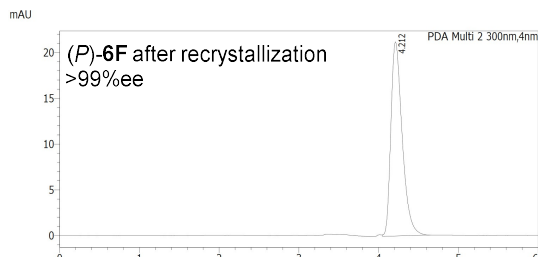

| Peak# | Retention time | Area   | %       |
|-------|----------------|--------|---------|
| 1     | 4.212          | 209712 | 100.000 |

Fig. S7 HPLC chromatograms of 6CF.

#### 4. X-Ray Crystallographic Details

All thermal ellipsoids were scaled to 50% probability.

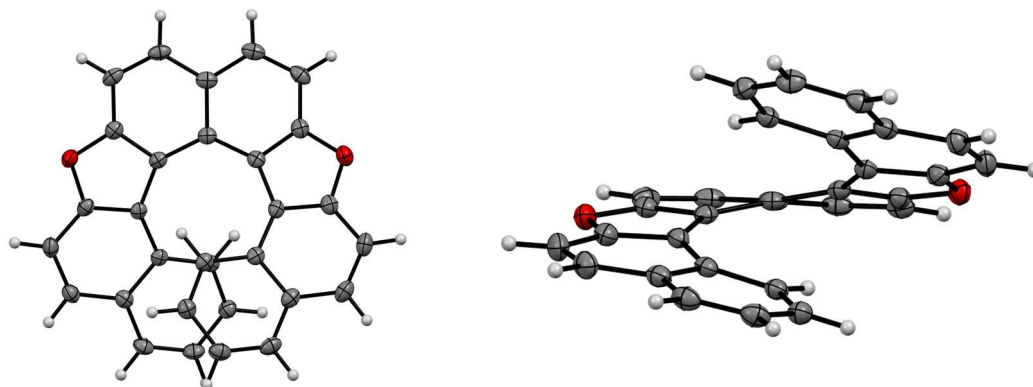

**Fig. S8** ORTEP representation of the crystal structure of (*rac*)-6O.

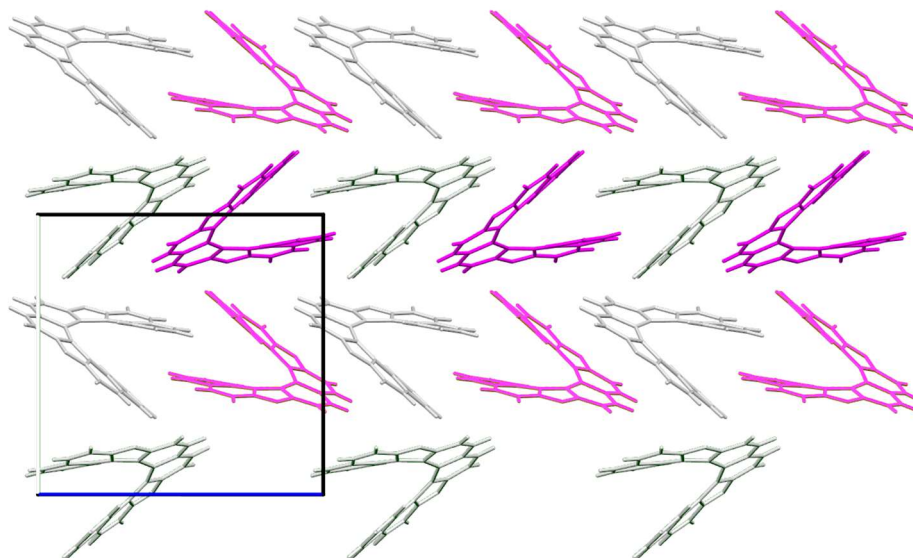

**Fig. S9** Packing structure of (*rac*)-6O.

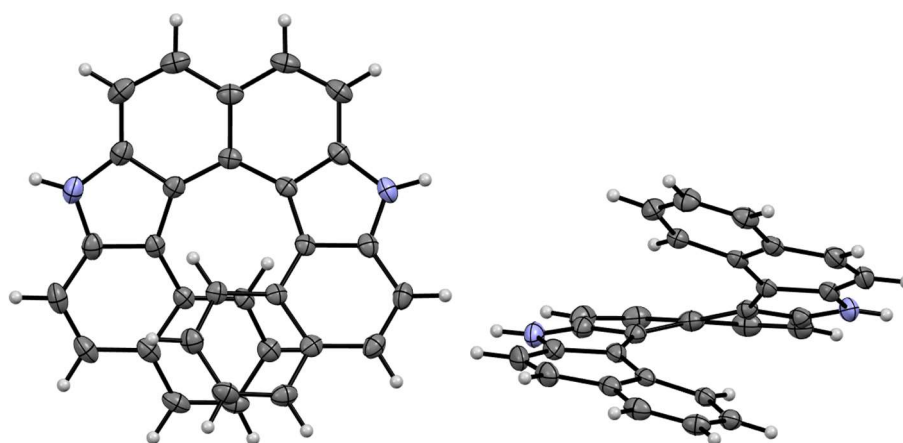

**Fig. S10** ORTEP representation of the crystal structure of (*rac*)-6N.

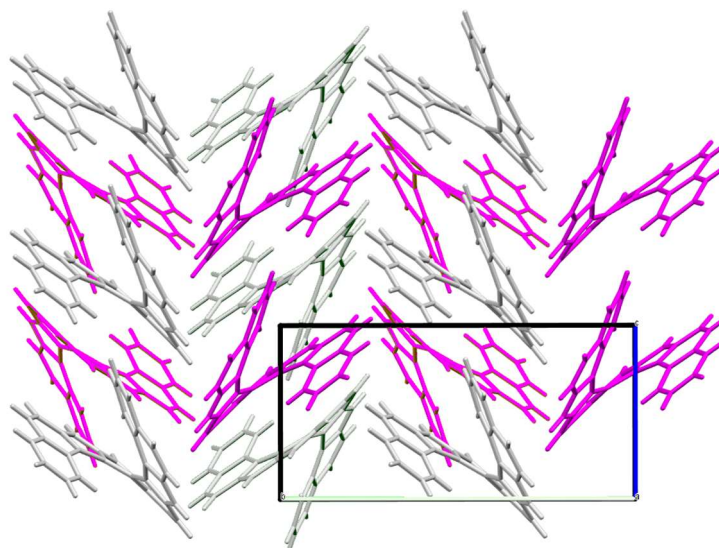

**Fig. S11** Packing structure of (*rac*)-6N.

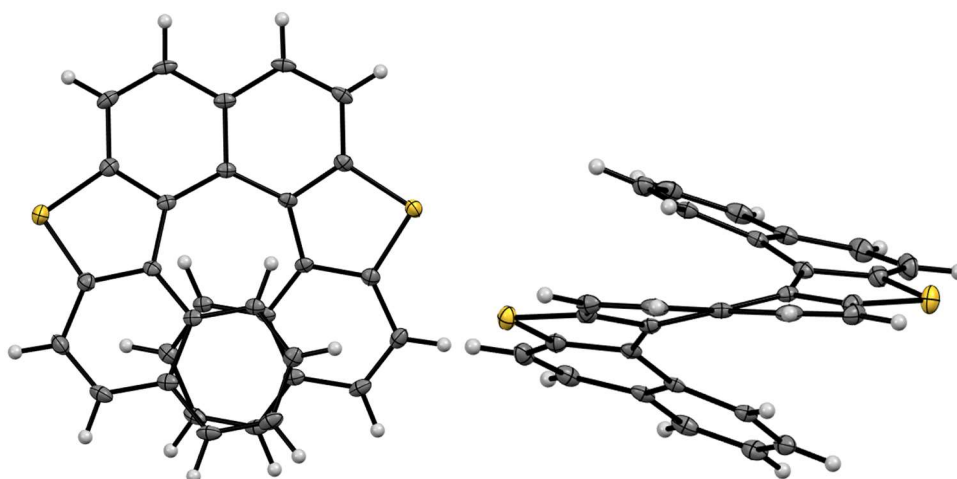

**Fig. S12** ORTEP representation of the crystal structure of (*rac*)-6S.

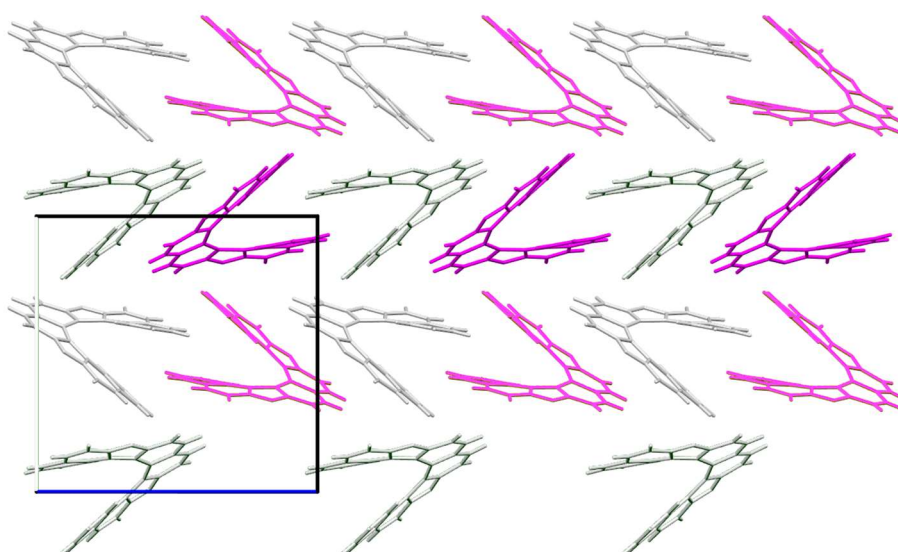

**Fig. S13** Packing structure of (*rac*)-6S.

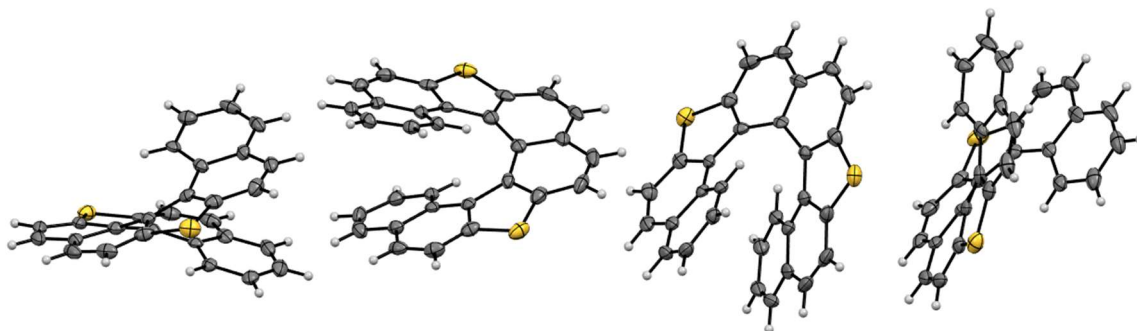

**Fig. S14** ORTEP representation of the crystal structure of (*P*)-**6S** derived from 2nd fraction of **4'**. The unit cell contained four independent molecules.

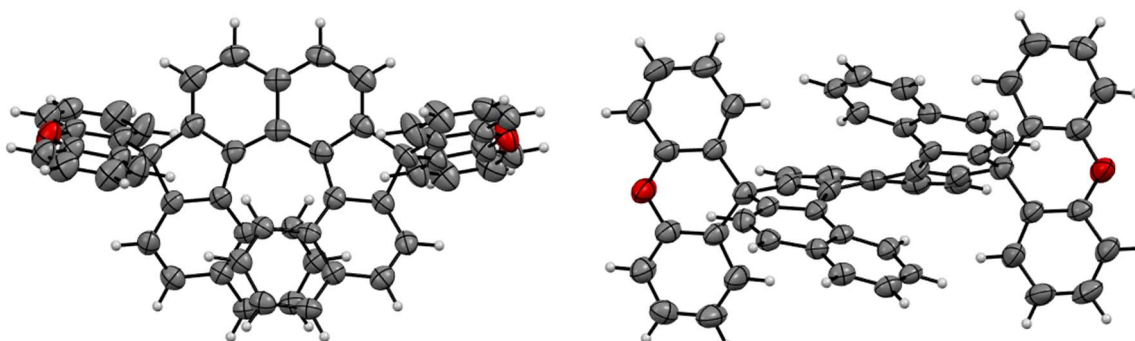

**Fig. S15** ORTEP representation of the crystal structure of **6CX** obtained from a solution of (*rac*)-**6CX** in  $\text{CHCl}_3/n$ -hexane. Due to spontaneous resolution, the crystal consisted of only one isomer, but the absolute configuration was not determined. Solvent molecules were omitted for clarity.

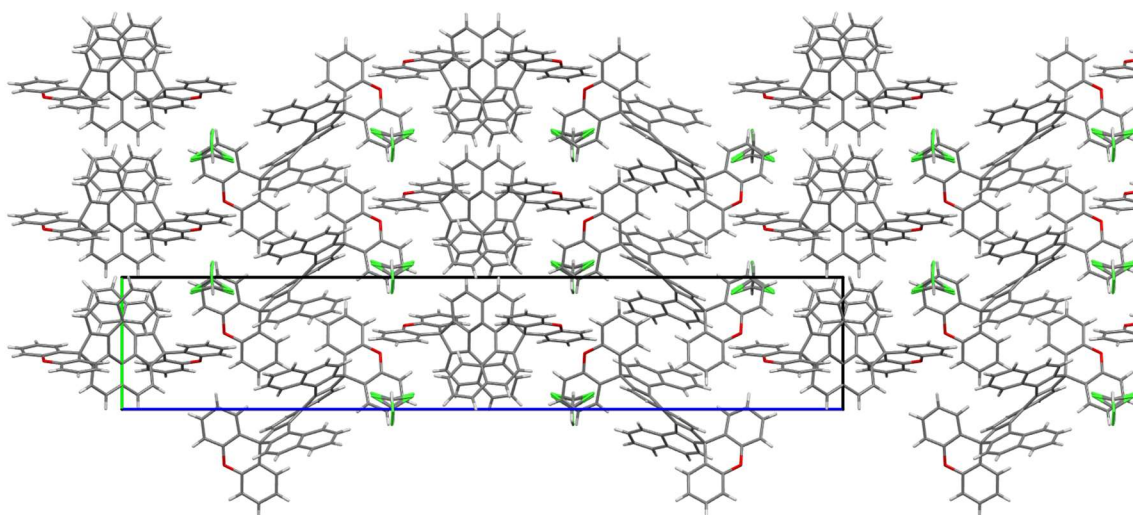

**Fig. S16** Packing structure of **6CX**.

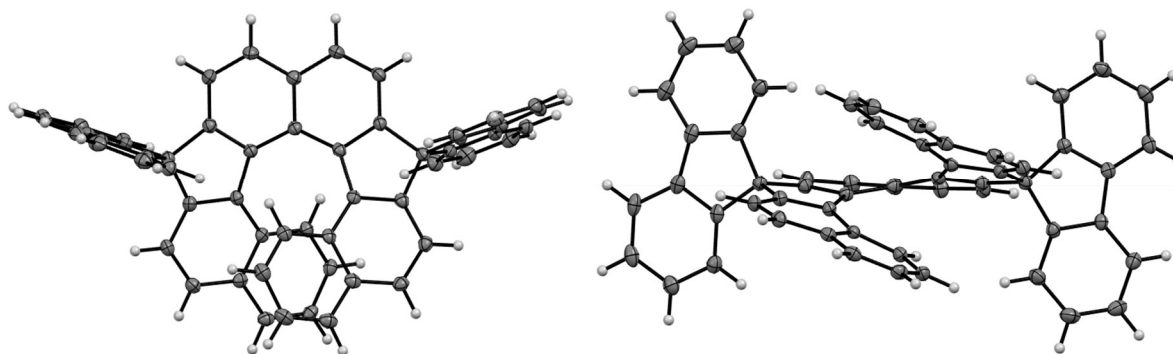

**Fig. S17** ORTEP representation of the crystal structure of (*M*)-**6CF** obtained from a solution of (*rac*)-**6CF** in CH<sub>2</sub>Cl<sub>2</sub>/ *n*-hexane. Due to spontaneous resolution, the crystal consisted of only (*M*)-isomer. Solvent molecules were omitted for clarity.

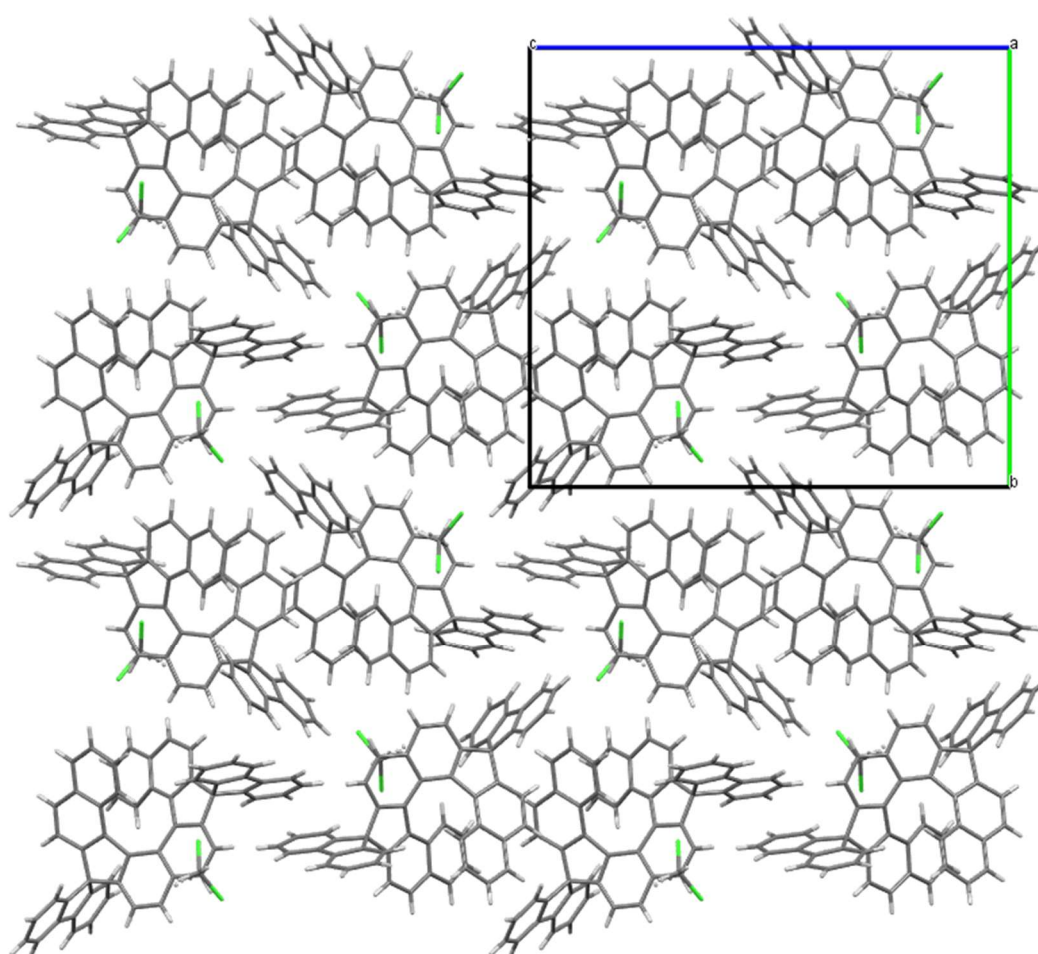

**Fig. S18** Packing structure of (*M*)-**6CF**.



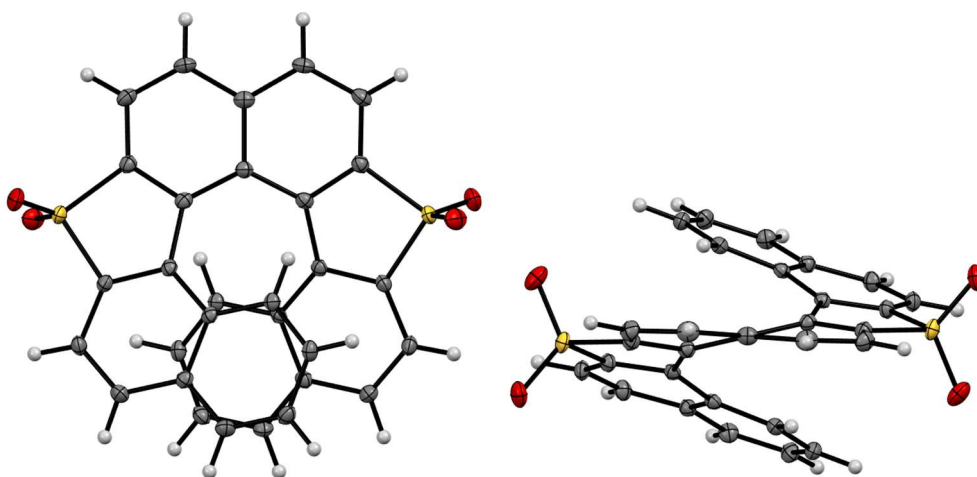

**Fig. S19** ORTEP representation of the crystal structure of (*rac*)-6SO<sub>2</sub>.

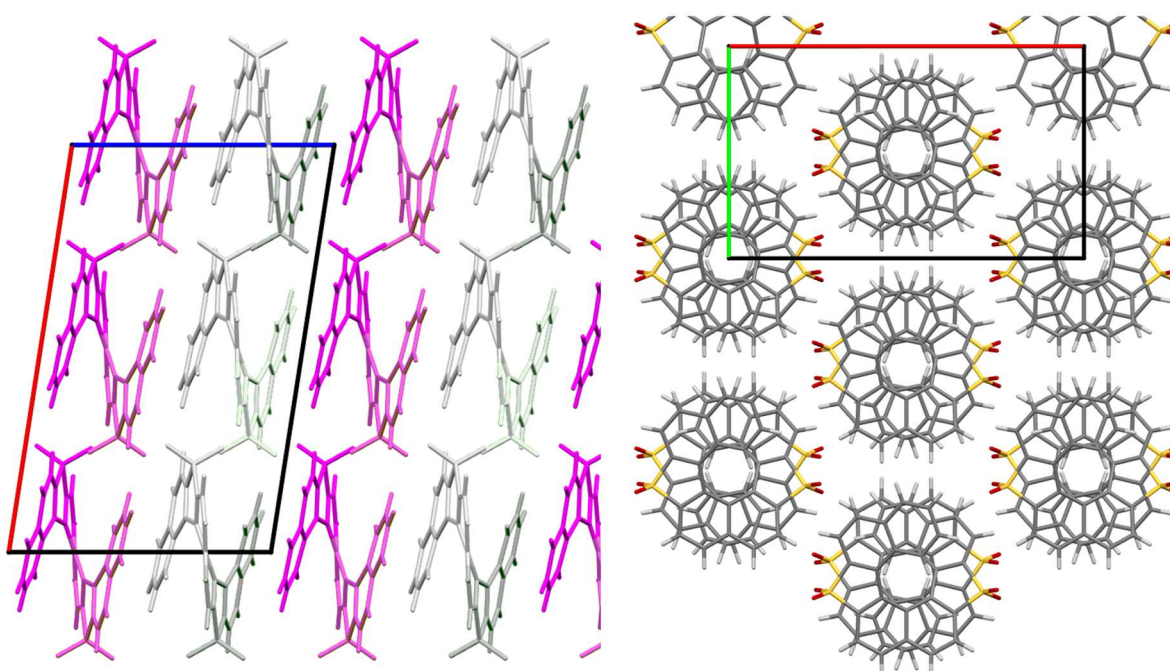

**Fig. S20** Packing structure of (*rac*)-6SO<sub>2</sub>.

**Table S1** Crystal parameters and structural refinement data.

| Compound                                           | <i>(rac)</i> - <b>6O</b>                       | <i>(rac)</i> - <b>6S</b>                           | <i>(rac)</i> - <b>6N</b>                                       |
|----------------------------------------------------|------------------------------------------------|----------------------------------------------------|----------------------------------------------------------------|
| Empirical Formula                                  | C <sub>30</sub> H <sub>16</sub> O <sub>2</sub> | C <sub>30</sub> H <sub>16</sub> S <sub>2</sub>     | C <sub>30</sub> H <sub>18</sub> N <sub>2</sub>                 |
| <i>M<sub>w</sub></i>                               | 408.46                                         | 440.55                                             | 406.46                                                         |
| Crystal System                                     | Monoclinic                                     | Monoclinic                                         | Monoclinic                                                     |
| Space Group                                        | <i>P</i> 2 <sub>1</sub> / <i>c</i> (No.14)     | <i>P</i> 2 <sub>1</sub> / <i>n</i> (No.11)         | <i>P</i> 2 <sub>1</sub> / <i>c</i> (No.14)                     |
| <i>a</i> [Å]                                       | 8.1656(12)                                     | 9.338(3)                                           | 15.9958(1)                                                     |
| <i>b</i> [Å]                                       | 15.1358(14)                                    | 13.622(3)                                          | 15.9492(1)                                                     |
| <i>c</i> [Å]                                       | 15.7979(16)                                    | 16.299(4)                                          | 7.8148(1)                                                      |
| <i>α</i> [deg]                                     | 90                                             | 90                                                 | 90                                                             |
| <i>β</i> [deg]                                     | 102.46682(19)                                  | 102.204(7)                                         | 91.516(1)                                                      |
| <i>γ</i> [deg]                                     | 90                                             | 90                                                 | 90                                                             |
| Volume / Å <sup>3</sup>                            | 1906.5(4)                                      | 2026.4(9)                                          | 1993.02(3)                                                     |
| <i>Z</i>                                           | 4                                              | 4                                                  | 4                                                              |
| Density [g·cm <sup>-3</sup> ]                      | 1.423                                          | 1.444                                              | 1.355                                                          |
| Flack parameter                                    | --                                             | --                                                 | --                                                             |
| Completeness                                       | 0.969                                          | 0.994                                              | 0.989                                                          |
| Goodness-of-fit                                    | 1.046                                          | 1.071                                              | 1.049                                                          |
| <i>R</i> <sub>1</sub> [ <i>I</i> > 2σ( <i>I</i> )] | 0.0313                                         | 0.0311                                             | 0.0380                                                         |
| <i>wR</i> <sub>2</sub> (all data)                  | 0.0844                                         | 0.0797                                             | 0.0948                                                         |
| Solvent system                                     | CHCl <sub>3</sub>                              | CH <sub>2</sub> Cl <sub>2</sub> / <i>n</i> -hexane | CH <sub>2</sub> Cl <sub>2</sub> /acetone<br>/ <i>n</i> -hexane |
| CCDC number                                        | 1504747                                        | 2047440                                            | 2047442                                                        |

  

| Compound                                           | <i>(M)</i> - <b>6CX</b> <sup>[a,b]</sup>                                     | <i>(M)</i> - <b>6CF</b> <sup>[a]</sup>                                | <i>(rac)</i> - <b>6SO<sub>2</sub></b>                               |
|----------------------------------------------------|------------------------------------------------------------------------------|-----------------------------------------------------------------------|---------------------------------------------------------------------|
| Empirical Formula                                  | 0.5(C <sub>56</sub> H <sub>32</sub> O <sub>2</sub> )·0.5(CHCl <sub>3</sub> ) | (C <sub>56</sub> H <sub>32</sub> )·(CH <sub>2</sub> Cl <sub>2</sub> ) | 0.5(C <sub>30</sub> H <sub>16</sub> O <sub>4</sub> S <sub>2</sub> ) |
| <i>M<sub>w</sub></i>                               | 428.09                                                                       | 789.74                                                                | 252.27                                                              |
| Crystal System                                     | Tetragonal                                                                   | Orthorhombic                                                          | Monoclinic                                                          |
| Space Group                                        | <i>P</i> 4 <sub>1</sub> 2 2 (No.91)                                          | <i>P</i> 2 <sub>1</sub> 2 <sub>1</sub> 2 <sub>1</sub> (No.19)         | <i>C</i> 2/ <i>c</i> (No.15)                                        |
| <i>a</i> [Å]                                       | 9.0201(9)                                                                    | 8.57192(4)                                                            | 17.7976(2)                                                          |
| <i>b</i> [Å]                                       | 9.0201(9)                                                                    | 20.53361(10)                                                          | 10.4721(1)                                                          |
| <i>c</i> [Å]                                       | 49.382(7)                                                                    | 22.43166(11)                                                          | 11.7388(1)                                                          |
| <i>α</i> [deg]                                     | 90                                                                           | 90                                                                    | 90                                                                  |
| <i>β</i> [deg]                                     | 90                                                                           | 90                                                                    | 99.158(1)                                                           |
| <i>γ</i> [deg]                                     | 90                                                                           | 90                                                                    | 90                                                                  |
| Volume / Å <sup>3</sup>                            | 4017.8(10)                                                                   | 3948.25(3)                                                            | 2159.97(4)                                                          |
| <i>Z</i>                                           | 8                                                                            | 4                                                                     | 8                                                                   |
| Density [g·cm <sup>-3</sup> ]                      | 1.415                                                                        | 1.329                                                                 | 1.552                                                               |
| Flack parameter                                    | 0.478(5)                                                                     | 0.001(4)                                                              | --                                                                  |
| Completeness                                       | 1.61/1.00                                                                    | 1.77/0.99                                                             | 0.989                                                               |
| Goodness-of-fit                                    | 1.002                                                                        | 1.030                                                                 | 1.093                                                               |
| <i>R</i> <sub>1</sub> [ <i>I</i> > 2σ( <i>I</i> )] | 0.0853                                                                       | 0.0366                                                                | 0.0360                                                              |
| <i>wR</i> <sub>2</sub> (all data)                  | 0.2449                                                                       | 0.1004                                                                | 0.0975                                                              |
| Solvent system                                     | CHCl <sub>3</sub> / <i>n</i> -hexane                                         | CH <sub>2</sub> Cl <sub>2</sub> / <i>n</i> -hexane                    | CH <sub>2</sub> Cl <sub>2</sub> /EtOAc                              |
| CCDC number                                        | 2047444                                                                      | 2047445                                                               | 2047446                                                             |

[a] The crystal was obtained from a solution of racemate by spontaneous resolution. [b] The accuracy of the absolute configuration is low.

| Compound                                           | ( <i>P</i> )-6S                                    |
|----------------------------------------------------|----------------------------------------------------|
| Empirical Formula                                  | 4(C <sub>30</sub> H <sub>16</sub> S <sub>2</sub> ) |
| <i>M<sub>w</sub></i>                               | 1762.19                                            |
| Crystal System                                     | Monoclinic                                         |
| Space Group                                        | <i>P</i> 2 <sub>1</sub> (No.4)                     |
| <i>a</i> [Å]                                       | 17.272(2)                                          |
| <i>b</i> [Å]                                       | 14.9852(13)                                        |
| <i>c</i> [Å]                                       | 17.311(2)                                          |
| $\alpha$ [deg]                                     | 90                                                 |
| $\beta$ [deg]                                      | 114.511(3)                                         |
| $\gamma$ [deg]                                     | 90                                                 |
| Volume / Å <sup>3</sup>                            | 4076.7(8)                                          |
| <i>Z</i>                                           | 2                                                  |
| Density [g·cm <sup>-3</sup> ]                      | 1.436                                              |
| Flack parameter                                    | 0.050(3)                                           |
| Completeness                                       | 1.89/0.99                                          |
| Goodness-of-fit                                    | 1.083                                              |
| <i>R</i> <sub>1</sub> [ <i>I</i> > 2σ( <i>I</i> )] | 0.0505                                             |
| <i>wR</i> <sub>2</sub> (all data)                  | 0.1379                                             |
| Solvent system                                     | CH <sub>2</sub> Cl <sub>2</sub> / <i>n</i> -hexane |
| CCDC number                                        | 2047441                                            |

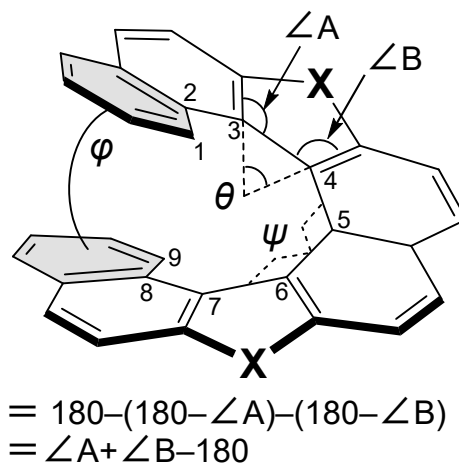

**Fig. S21.** Definition of structural parameters.

**Table S2** Summary of structural features of helicenes based on X-ray crystal structures.

| Compound                        | Bond length / Å<br>(Inner helix)                  | Wedge<br>angle | Torsional angle                                              | Interplanar angle |
|---------------------------------|---------------------------------------------------|----------------|--------------------------------------------------------------|-------------------|
| ---                             | C1-C2, C2-C3, ...<br>C7-C8, C8-C9                 | $\theta$       | $\psi$ : $\angle$ C1-C2-C3-C4, ...<br>, $\angle$ C6-C7-C8-C9 | $\phi$            |
| ( <i>rac</i> )-6O               | 1.41, 1.44, 1.46, 1.44,<br>1.44, 1.47, 1.44, 1.41 | 30°            | 4.1°, 12.7°, 20.4°, 18.5,<br>9.1°, 9.0° (73.8° total)        | 34.0°             |
| ( <i>rac</i> )-6N               | 1.42, 1.44, 1.45, 1.44,<br>1.43, 1.45, 1.43, 1.42 | 32°            | 7.3°, 14.0°, 23.1°, 18.2°,<br>12.9°, 9.5° (85.0° total)      | 38.5°             |
| ( <i>rac</i> )-6S               | 1.41, 1.44, 1.45, 1.44,<br>1.44, 1.46, 1.44, 1.41 | 42°            | 11.9°, 17.8°, 20.7°, 18.0°,<br>16.1°, 15.4° (99.9° total)    | 20.6°             |
| ( <i>M</i> )-6CX                | 1.41, 1.42, 1.48, 1.43,<br>1.43, 1.48, 1.42, 1.41 | 36°            | 4.8°, 15.3°, 25.0°, 25.0°,<br>15.3°, 4.8° (90.2° total)      | 51.2°             |
| ( <i>M</i> )-6CF                | 1.42, 1.43, 1.49, 1.44,<br>1.44, 1.48, 1.43, 1.42 | 36°            | 14.9°, 16.7°, 14.5°, 19.3°,<br>18.3°, 11.7° (95.5° total)    | 21.0°             |
| ( <i>rac</i> )-6SO <sub>2</sub> | 1.42, 1.43, 1.49, 1.43,<br>1.43, 1.49, 1.43, 1.42 | 44°            | 11.6°, 18.8°, 19.4°, 19.4°,<br>18.8°, 11.6° (99.6° total)    | 21.1°             |

**Table S3** Summary of Structural features of helicenes based on DFT calculation.

| Compound               | Bond length /Å<br>(Inner helix)                    | Wedge<br>angle | Torsional angle                                            | Interplanar<br>angle |
|------------------------|----------------------------------------------------|----------------|------------------------------------------------------------|----------------------|
| <b>6O</b>              | 1.41, 1.43, 1.46, 1.43,<br>1.43, 1.46, 1.43, 1.41  | 30°            | 7.2°, 12.5°, 20.0°, 20.0°,<br>12.5°, 7.3° (79.5° total)    | 35.4°                |
| <b>6N</b>              | 1.41, 1.43, 1.45, 1.43,<br>1.443, 1.45, 1.43, 1.41 | 33°            | 9.6°, 15.7°, 18.5°, 18.5°,<br>15.7°, 9.6° (87.6° total)    | 29.5°                |
| <b>6S</b>              | 1.41, 1.44, 1.46, 1.44,<br>1.44, 1.46, 1.44, 1.41. | 42°            | 14.6°, 17.7°, 18.2°, 18.2°,<br>17.7°, 14.6° (101.0° total) | 15.8°                |
| <b>6CF</b>             | 1.42, 1.43, 1.49, 1.44,<br>1.44, 1.49, 1.43, 1.42  | 36°            | 12.4°, 17.3°, 17.9°, 17.9°,<br>17.2°, 12.4° (95.1° total)  | 19.7°                |
| <b>6SO<sub>2</sub></b> | 1.42, 1.43, 1.49, 1.43,<br>1.43, 1.49, 1.43, 1.42  | 45°            | 12.3°, 19.3°, 19.3°, 19.3°,<br>19.3°, 12.3° (101.8° total) | 18.1°                |
| carbo[8]helicene       | 1.42, 1.45, 1.44, 1.45,<br>1.45, 1.44, 1.45, 1.42  | 56°            | 19.1°, 27.2°, 22.9°, 22.9°,<br>27.2°, 19.2° (138.5° total) | 7.1°                 |

All geometries were optimized and characterized at the B3LYP-D3(BJ)/6-311G(d,p) level in the gas phase.

## 5. Racemization Experiments

A 20-mL Schlenk tube was charged with an enantio-enriched helicene (1.5 mg) and anhydrous tetraglyme (4.0 mL). The solution was heated at the indicated temperature under a nitrogen atmosphere, and the time-course of enantiomeric ratio was monitored by HPLC.

(*M*)-**6O**, **6S**, **6CF**, and (*P*)-**6N** were used for the experiments. Unfortunately, **6SO**<sub>2</sub> was unstable under heating conditions and completely decomposed to form a complex mixture within 10 min at 270 °C.

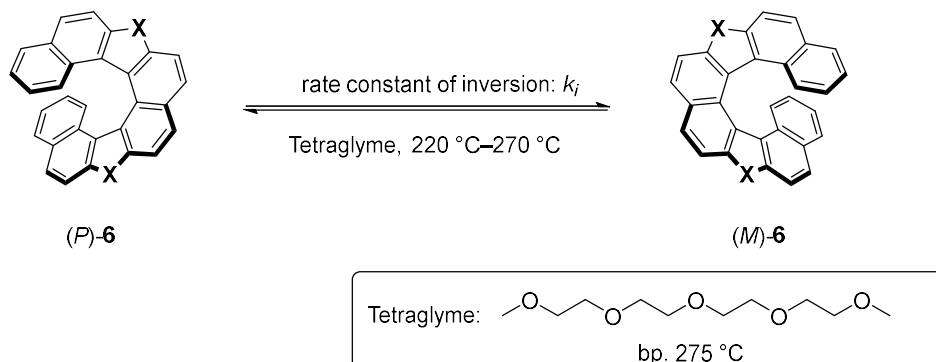

We determined the thermodynamic parameters of the racemization of the series of helicenes. Since the racemization is a reversible unimolecular process, the differential equation for the racemization is given below:

$$\frac{d[M]}{dt} = -k_i[M] + k_i[P] \quad (1)$$

$$[P] + [M] = 100 \quad (2)$$

[*M*]: the ratio of (*P*)-**6**, [*P*]: the ratio of (*M*)-**6**

Rearrange to give:

$$\frac{d[M]}{dt} = -k_i[M] + k_i(100 - [M]) = -k_i(2[M] - 100) \quad (3)$$

Integral representation of eq. 3 is given below:

$$[M] = 50 + ([M_0] - 50) \times e^{-2k_it} \quad (4)$$

[*M*<sub>0</sub>]: the initial ratio of the (*M*)-isomer

According to eq. 2 and eq. 4, the relationship between [*P*] and time is given below:

$$[P] = 50 - ([M_0] - 50) \times e^{-2k_it} \quad (5)$$

According to eq. 4 and eq. 5, ee can be represented as a function of time given below:

$$\begin{aligned}
 ee(t) &= [M] - [P] \\
 &= 2 \times ([M_0] - 50) \times e^{-2k_it} \\
 &= ee_0 \times e^{-2k_it} \quad (ee_0: \text{the initial ee}) \quad (5)
 \end{aligned}$$

Experimental values of  $[M_0]$  and  $k_i$  were obtained by curve fitting of the time-courses of ee to eq. 5 using SciPy (ver. 1.5.2).

According to eq 5., the rate constant of racemization can be given as  $k_r = 2k_i$ .

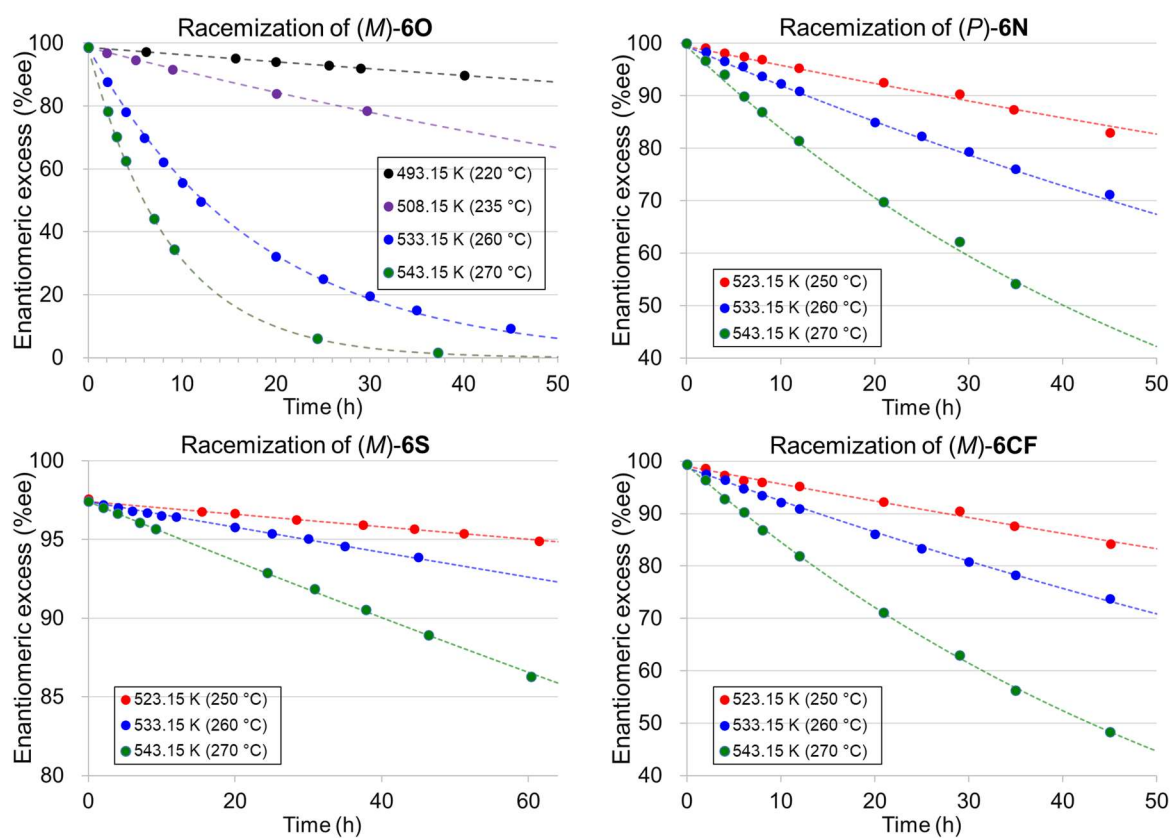

**Fig. S22** Time-courses of ee over the reaction time at various temperatures.

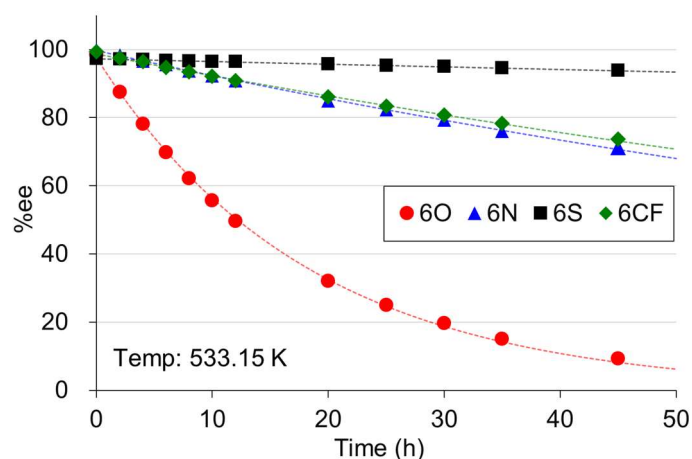

**Fig. S23** Time-courses of ee of a series of helicenes over the reaction time at 533.15 K.

**Table S4** Rate constants of racemization of a series of helicenes at various temperatures.

| compound                 | rate constant of racemization: $k_r$ ( $10^{-7}$ /s) |                |                |                |                |
|--------------------------|------------------------------------------------------|----------------|----------------|----------------|----------------|
|                          | 493 K / 220 °C                                       | 508 K / 235 °C | 523 K / 250 °C | 533 K / 260 °C | 543 K / 270 °C |
| ( <i>M</i> )- <b>6O</b>  | 6.58                                                 | 21.5           | –              | 153            | 318            |
| ( <i>P</i> )- <b>6N</b>  | –                                                    | –              | 10.9           | 21.2           | 48.1           |
| ( <i>M</i> )- <b>6S</b>  | –                                                    | –              | 1.17           | 2.27           | 5.50           |
| ( <i>M</i> )- <b>6CF</b> | –                                                    | –              | 9.65           | 18.5           | 44.5           |

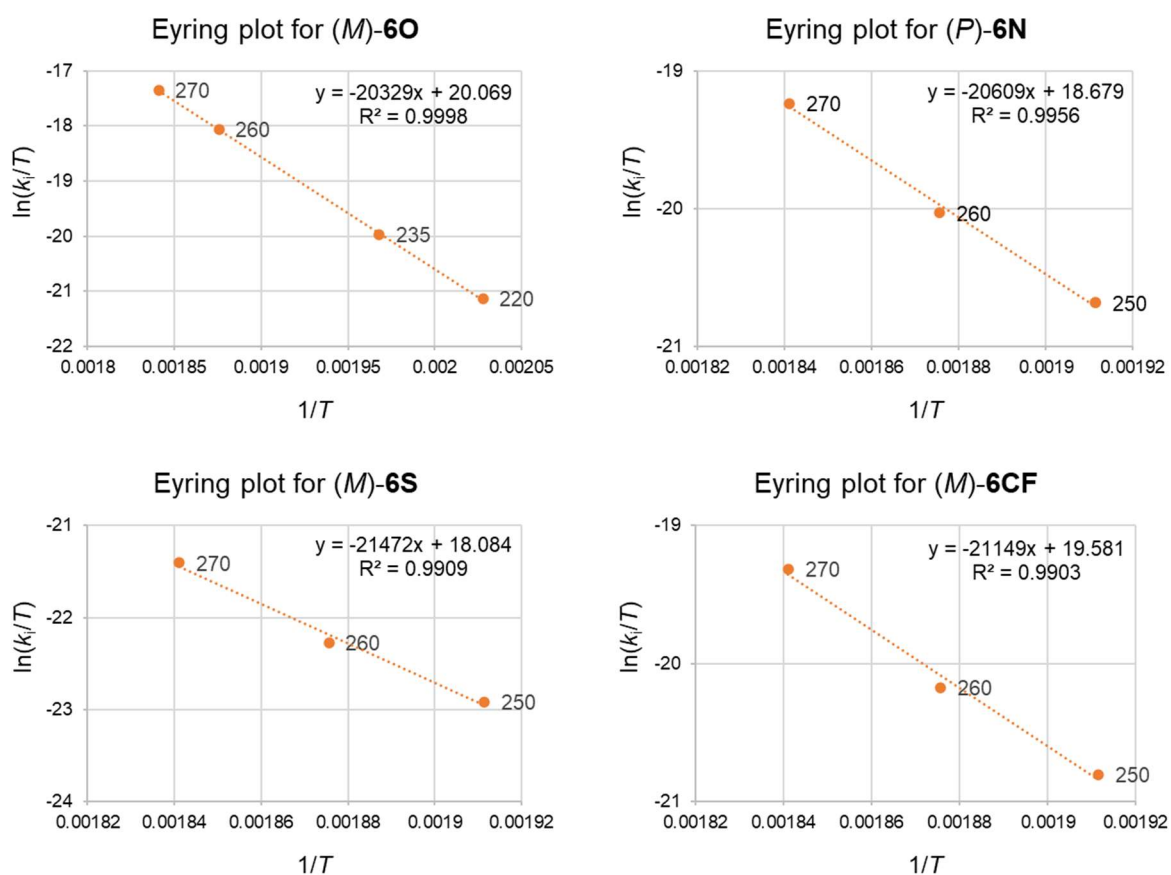**Fig. S24** Eyring plot.

**Table S5** Thermodynamic parameters of racemization of a series of helicenes obtained by Eyring plots and DFT calculations.

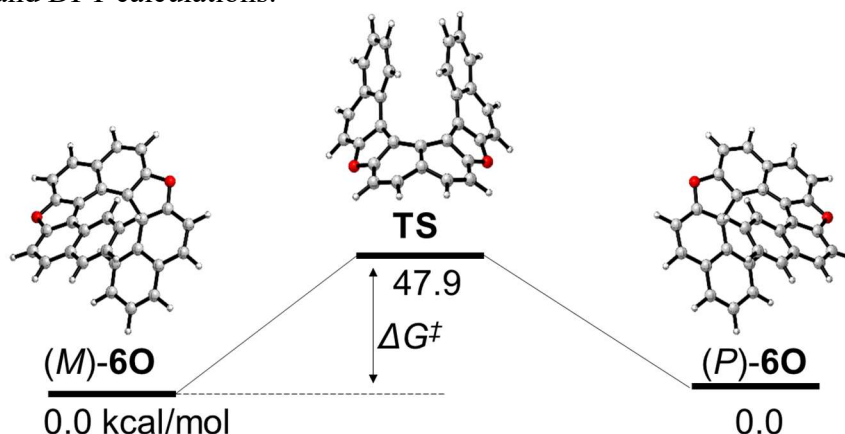

| compound               | $\Delta H^\ddagger$ (kcal/mol) | $\Delta S^\ddagger$ (cal/mol·K) | $\Delta G^\ddagger$ (kcal/mol) |
|------------------------|--------------------------------|---------------------------------|--------------------------------|
|                        | exp (calc.)                    | exp (calc.)                     | exp (calc.)                    |
| <b>6O</b>              | 40.4 (44.9)                    | -7.3 (-5.7)                     | 44.3 (47.9)                    |
| <b>6N</b>              | 41.0 (47.1)                    | -11.4 (-5.2)                    | 46.3 (49.8)                    |
| <b>6S</b>              | 42.7 (49.9)                    | -12.7 (-3.5)                    | 48.7 (51.7)                    |
| <b>6CF</b>             | 42.0 (46.6)                    | -9.7 (0.38)                     | 46.2 (46.4)                    |
| <b>6SO<sub>2</sub></b> | --(46.1)                       | -- (-5.9)                       | --(49.3)                       |
| carbo[8]helicene       | 41.0 (43.9)                    | -6.1(-3.9)                      | 43.5 (45.8) <sup>[a]</sup>     |

All geometries were optimized and characterized at the B3LYP-D3(BJ)/6-311G(d,p) level in the gas phase (533.15 K, 1 atm). [a] The experimental values were reported in ref. 8.

Racemization is a multi-step process. The shown value is the activation free energy from the minimum structure to the highest TS (See Fig. S25).

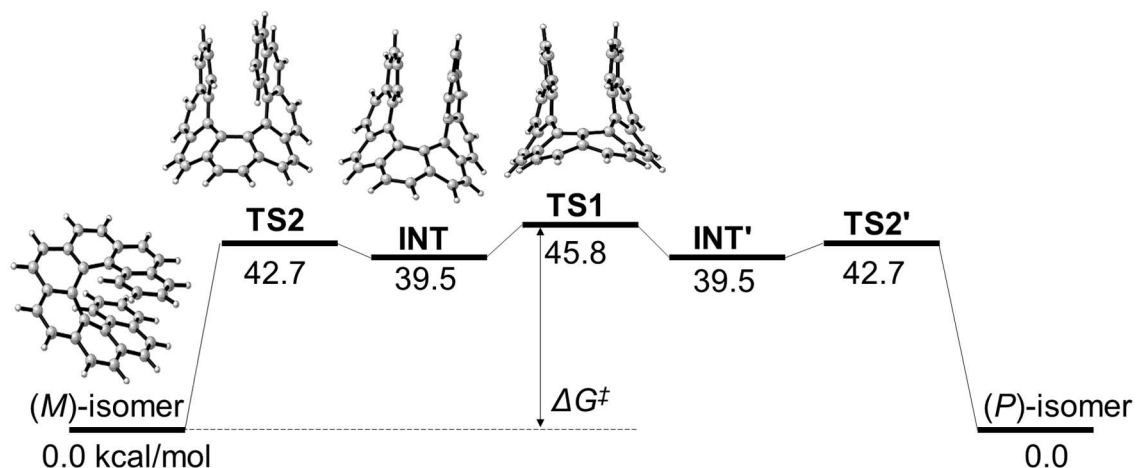

**Fig. S25** Energy diagram of racemization of carbo[8]helicene. The pathway from **TS1** to (*P*)-isomer is omitted because it is the mirror-symmetric with the shown pathway.



**Table S6** Dependence of the activation free energy of racemization on DFT functionals.

| DFT functional              | $\Delta G^\ddagger$ (kcal/mol) |                  | $\Delta\Delta G^\ddagger$ (kcal/mol) |
|-----------------------------|--------------------------------|------------------|--------------------------------------|
|                             | 6O                             | carbo[8]helicene |                                      |
| experimental values         | 44.3                           | 43.5             | 0.8                                  |
| B3LYP                       | 45.1                           | 42.3             | 2.8                                  |
| B3LYP-D3                    | 47.4                           | 45.0             | 2.4                                  |
| B3LYP-D3(BJ)                | 47.9                           | 45.8             | 2.1                                  |
| B3LYP-D3(BJ) <sup>[a]</sup> | 47.5                           | 45.6             | 2.0                                  |
| PBE0                        | 45.6                           | 43.4             | 2.2                                  |
| PBE0-D3                     | 47.2                           | 45.5             | 1.7                                  |
| M06-2X                      | 47.5                           | 46.6             | 0.9                                  |
| $\omega$ B97X-D             | 48.6                           | 46.1             | 2.4                                  |

Geometry optimization and frequency calculations were conducted using the indicated DFT functional with 6-311G(d,p) basis set in the gas phase (533.15 K, 1 atm). [a] Def2-TZVP was used as a basis set.

### Racemization Dynamics in the course of cyclization reaction into 6O

Geometry optimization and frequency calculations were conducted with implicit solvation (SMD model for DMF) at the B3LYP-D3(BJ)/6-31+G(d) level of theory employing SDD as an ECP for Cs. Single point energies were calculated at the B3LYP-D3(BJ)/6-311+G(2df,p) level of theory employing SDD as an ECP for Cs, and SMD solvation model for DMF. Energies of all structures were corrected to a reference state of 1 mol/L at 403.15 K through addition of  $RT\ln(0.08206 \times T) = 2.80$  kcal/mol to every species. We have determined DMI to be the optimal solvent for the synthesis of 6O experimentally, but we have observed almost the same yield and enantioselectivity in the case of using DMF as a solvent.

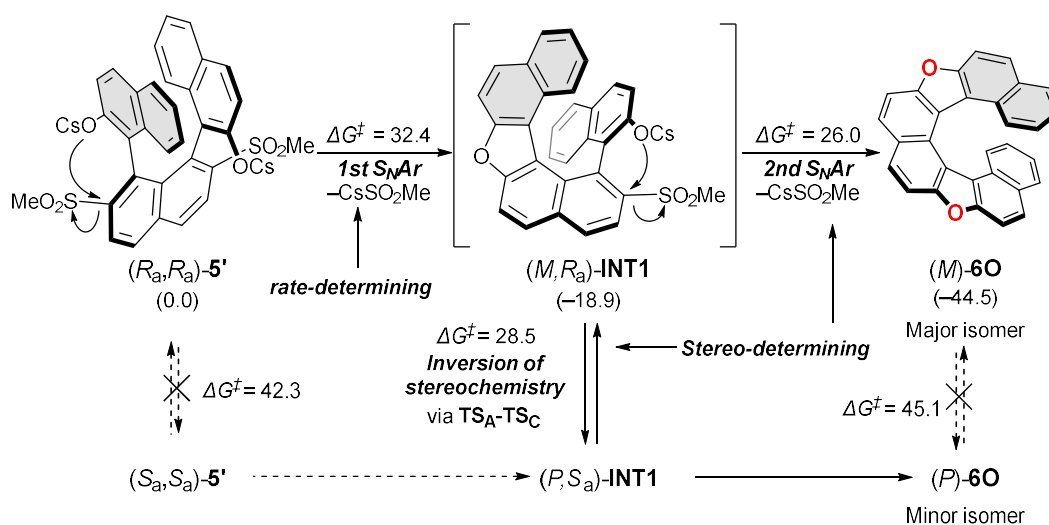**Scheme S1** Outline of the cyclization of 5' and racemization dynamics.

$\Delta G^\ddagger$  values represent the activation free energies (kcal/mol) of the forward reaction. The numbers in parentheses are the relative free energies (kcal/mol).

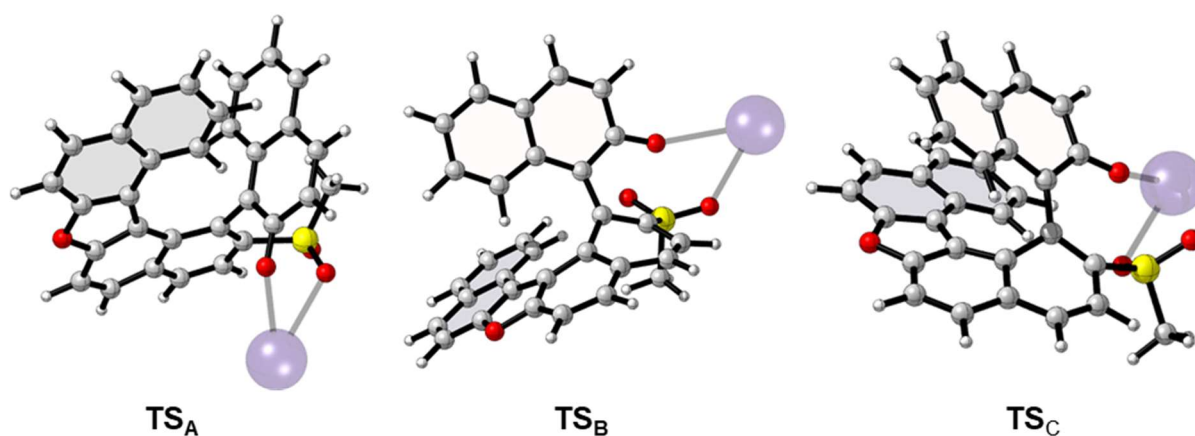

**Fig. S26.** The optimized structure of transition states.

### Experimental verification

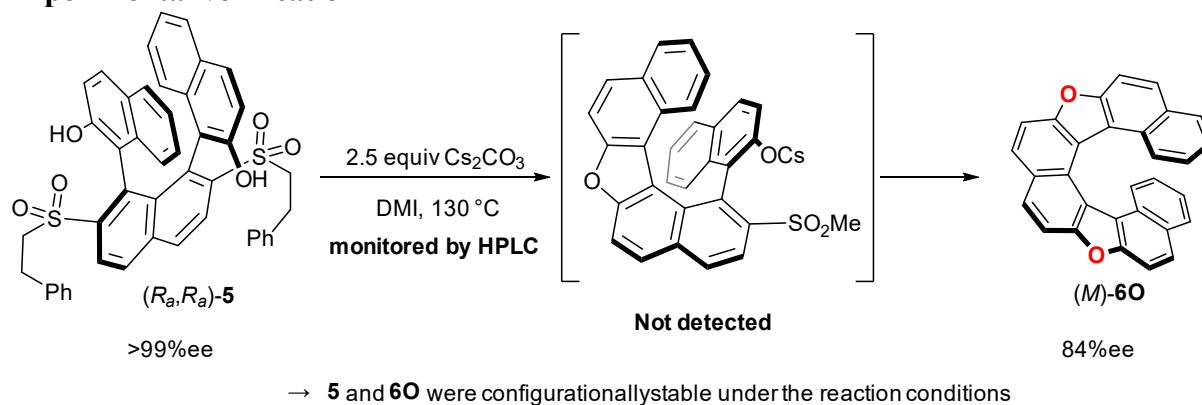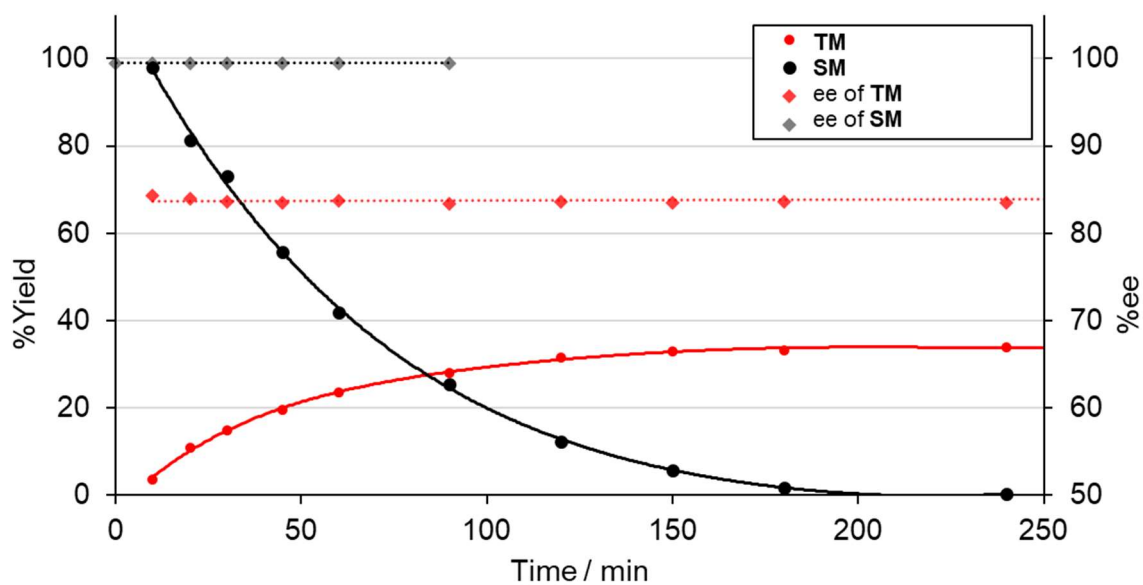

**Scheme S2** Time-course of yield and ee of the reaction components.

A 10-mL Schlenk tube was charged with (*R<sub>a</sub>,R<sub>a</sub>*)-**5** (74.8 mg, 0.10 mmol), Cs<sub>2</sub>CO<sub>3</sub> (81.0 mg, 0.25 mmol), dibenzofuran (16.4 mg, 0.10 mmol for an internal standard), and DMI (3 mL). The resulting solution was stirred at room temperature for 10 min and at 130 °C for 6 h. *ca.* 0.1 mL of the reaction mixture was taken from the Schlenk tube at the indicated time. The aliquot was neutralized by CH<sub>2</sub>Cl<sub>2</sub>/AcOH (1 mL, 20:1), filtered, and then analyzed by HPLC using dibenzofuran as an internal standard. During the reaction, racemization of (*R<sub>a</sub>,R<sub>a</sub>*)-**5** could not be detected, and ee of **60** was almost constant (84%ee). According to the conversion of the starting material and the product yield, noticeable accumulation of a reaction intermediate was unlikely although mass-balance was not good.

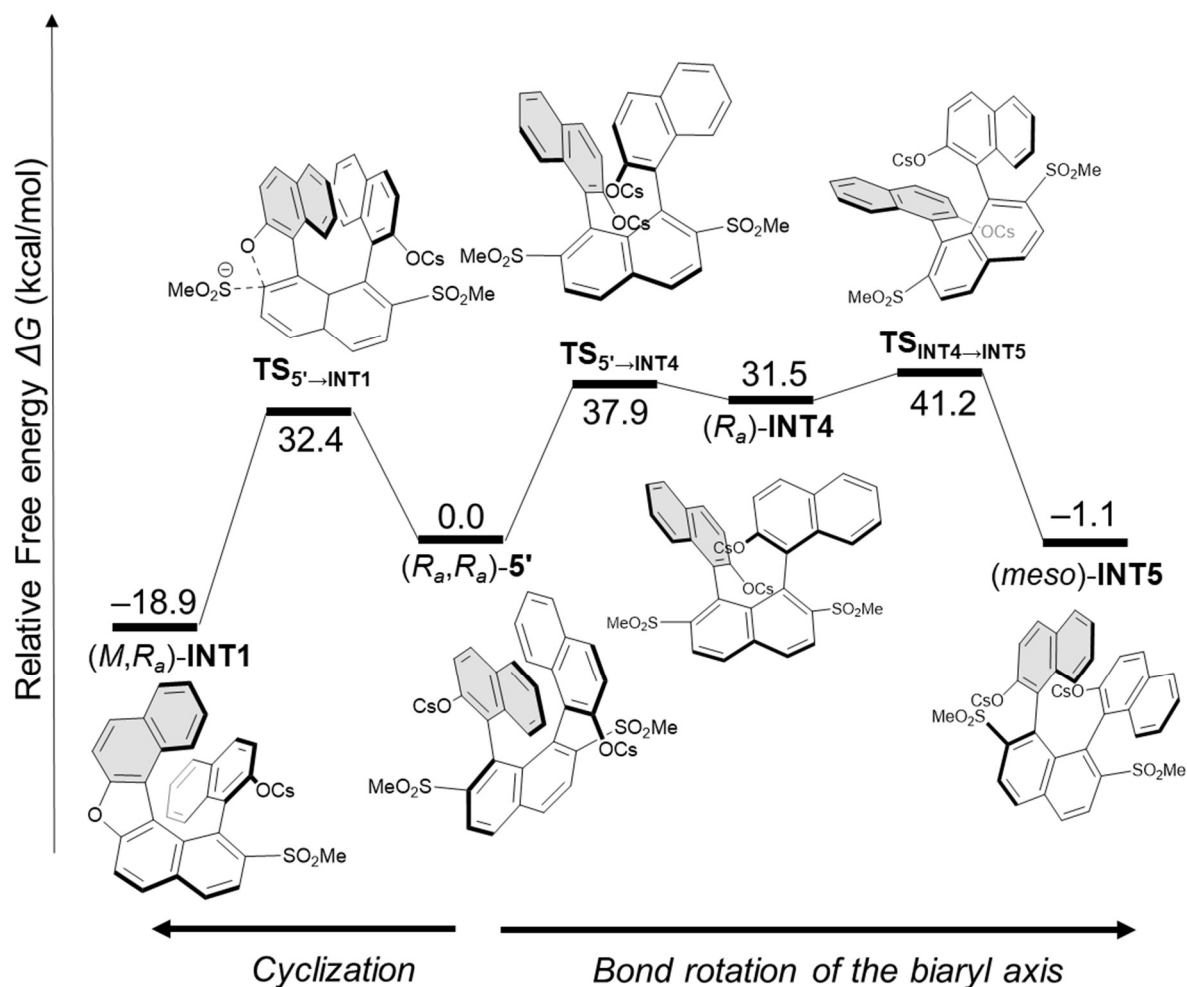

**Scheme S3** Free energy profile of the stereo-inversion of (*R,R*)-**5'**. The pathway from (*meso*)-**INT5** to (*P,S*)-**INT1** is omitted because it is the mirror symmetric with the shown pathway.

## 6. Optical Measurement

TD-DFT calculations were also conducted at B3LYP-D3(BJ)/6-311G(d,p) level in the gas phase.

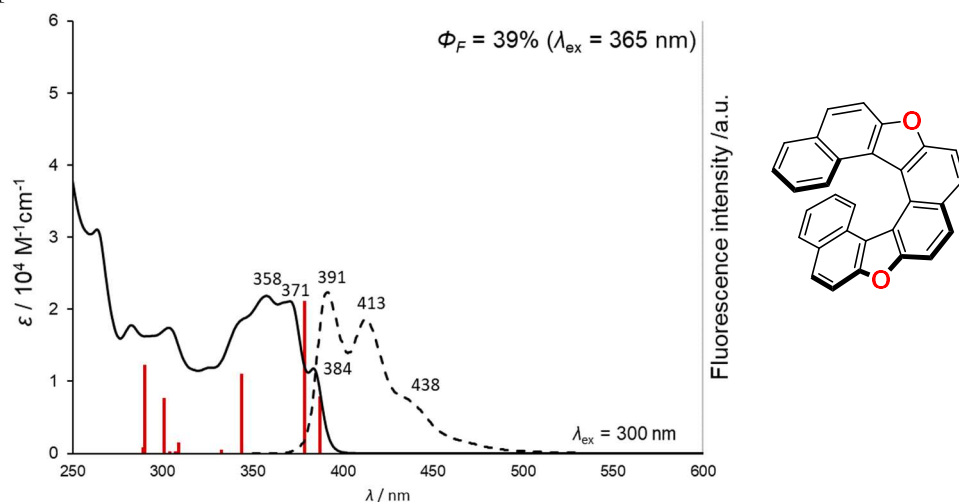

**Fig. S27** UV/Vis absorption spectra in  $\text{CH}_2\text{Cl}_2$  ( $9.0 \times 10^{-6} \text{ M}$ , solid line), the calculated oscillator strengths  $f$  (red bars), and fluorescence spectra in  $\text{CH}_2\text{Cl}_2$  ( $2.4 \times 10^{-6} \text{ M}$ , dashed line) of *(rac)*-6O.

**Table S7** Calculated electronic transition of *(M)*-6O.

| No. | Wavelength (nm) | coefficients | Electronic Transition               | $f$    | $R$       |
|-----|-----------------|--------------|-------------------------------------|--------|-----------|
| 1   | 387.48          | -0.15906     | 105 HOMO-1 $\rightarrow$ 107 LUMO   | 0.0790 | -211.5630 |
|     |                 | 0.68078      | 106 HOMO $\rightarrow$ 108 LUMO+1   |        |           |
| 2   | 378.94          | 0.68892      | 106 HOMO $\rightarrow$ 107 LUMO     | 0.2112 | 151.3496  |
|     |                 | 0.13425      | 104 HOMO-2 $\rightarrow$ 108 LUMO+1 |        |           |
| 3   | 343.78          | 0.67345      | 105 HOMO-1 $\rightarrow$ 107 LUMO   | 0.1106 | -274.7852 |
|     |                 | 0.15861      | 106 HOMO $\rightarrow$ 108 LUMO+1   |        |           |

$R$ : Rotatory Strength ( $\times 10^{-40} \text{ esu} \cdot \text{cm} \cdot \text{erg/Gauss}$ ).

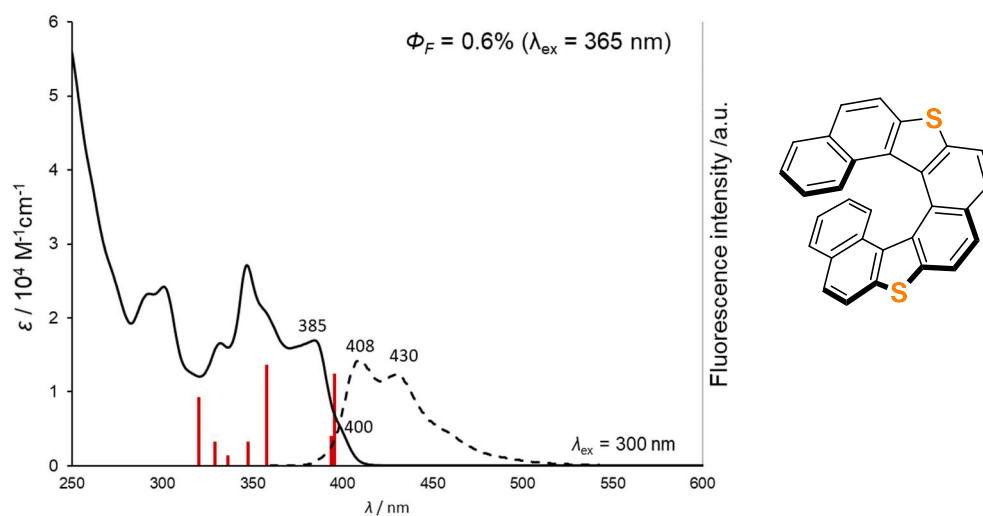

**Fig. S28** UV/Vis absorption spectra in  $\text{CH}_2\text{Cl}_2$  ( $1.4 \times 10^{-5} \text{ M}$ , solid line), the calculated oscillator strengths  $f$  (red bars), and fluorescence spectra in  $\text{CH}_2\text{Cl}_2$  ( $2.4 \times 10^{-6} \text{ M}$ , dashed line) of *(rac)*-6S.

**Table S8** Calculated electronic transition of (*M*)-**6S**.

| No. | Wavelength (nm) | coefficients | Electronic Transition   | $f$    | $R$       |
|-----|-----------------|--------------|-------------------------|--------|-----------|
| 1   | 395.52          | 0.11088      | 112 HOMO-2 → 116 LUMO+1 | 0.1247 | 62.5373   |
|     |                 | -0.13792     | 113 HOMO-1 → 116 LUMO+1 |        |           |
|     |                 | 0.67704      | 114 HOMO → 115 LUMO     |        |           |
| 2   | 394.24          | 0.21798      | 113 HOMO-1 → 115 LUMO   | 0.0397 | -162.8200 |
|     |                 | 0.66518      | 114 HOMO → 116 LUMO+1   |        |           |
| 3   | 357.99          | 0.18371      | 112 HOMO-2 → 115 LUMO   | 0.1360 | -194.5801 |
|     |                 | 0.61055      | 113 HOMO-1 → 115 LUMO   |        |           |
|     |                 | -0.22301     | 114 HOMO → 116 LUMO+1   |        |           |
|     |                 | 0.12777      | 114 HOMO → 118 LUMO+3   |        |           |
|     |                 | 0.10262      | 114 HOMO → 120 LUMO+5   |        |           |

$R$ : Rotatory Strength ( $\times 10^{-40}$  esu·cm·erg/Gauss).

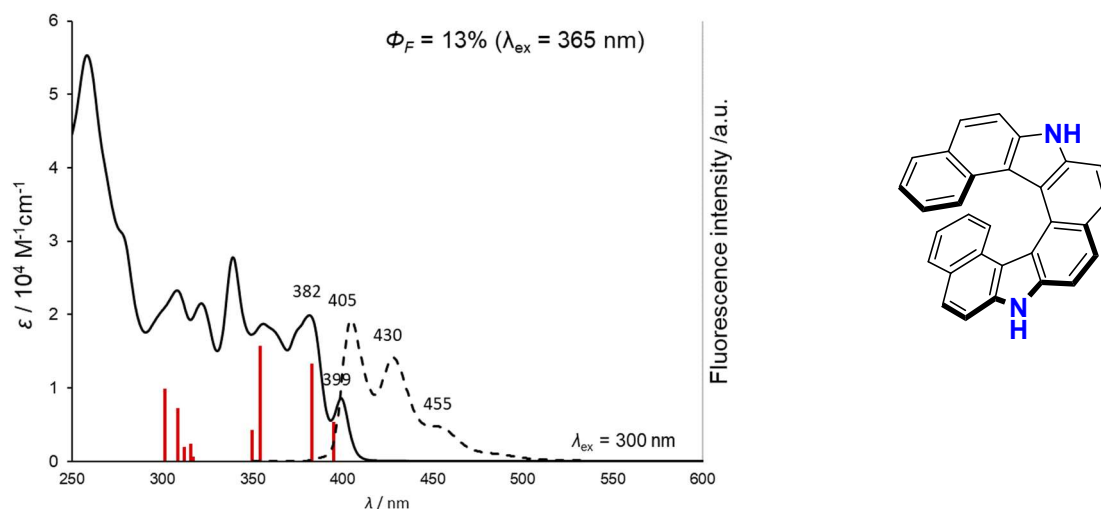**Fig. S29** UV/Vis absorption spectra in  $\text{CH}_2\text{Cl}_2$  ( $1.0 \times 10^{-5}$  M, solid line), the calculated oscillator strengths  $f$  (red bars), and fluorescence spectra in  $\text{CH}_2\text{Cl}_2$  ( $2.4 \times 10^{-6}$  M, dashed line) of (*rac*)-**6N**.**Table S9** Calculated electronic transition of (*M*)-**6N**.

| No. | Wavelength (nm) | coefficients | Electronic Transition   | $f$    | $R$       |
|-----|-----------------|--------------|-------------------------|--------|-----------|
| 1   | 395.20          | 0.25318      | 105 HOMO-1 → 107 LUMO   | 0.0540 | -171.8732 |
|     |                 | 0.65387      | 106 HOMO → 108 LUMO+1   |        |           |
| 2   | 383.05          | -0.14156     | 104 HOMO-2 → 108 LUMO+1 | 0.1337 | 92.3011   |
|     |                 | -0.22678     | 105 HOMO-1 → 108 LUMO+1 |        |           |
|     |                 | 0.64616      | 106 HOMO → 107 LUMO     |        |           |
| 3   | 354.70          | 0.63770      | 105 HOMO-1 → 107 LUMO   | 0.1576 | -319.5628 |
|     |                 | -0.24928     | 106 HOMO → 108 LUMO+1   |        |           |

$R$ : Rotatory Strength ( $\times 10^{-40}$  esu·cm·erg/Gauss)

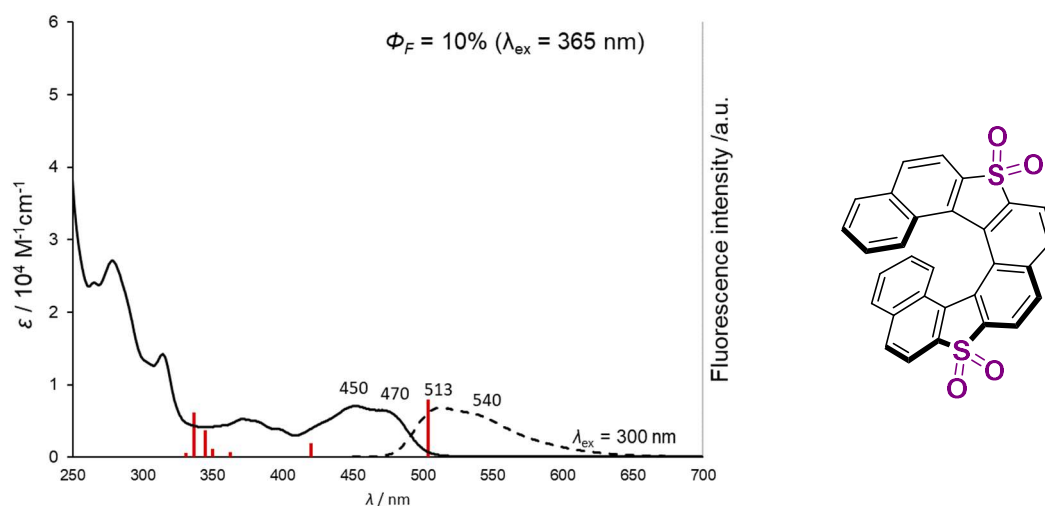

**Fig. S30** UV/Vis absorption spectra in  $\text{CH}_2\text{Cl}_2$  ( $4.0 \times 10^{-5}$  M, solid line), the calculated oscillator strengths  $f$  (red bars), and fluorescence spectra in  $\text{CH}_2\text{Cl}_2$  ( $2.6 \times 10^{-6}$  M, dashed line) of (*rac*)-**6SO<sub>2</sub>**.

**Table S10** Calculated electronic transition of (*M*)-**6SO<sub>2</sub>**.

| No. | Wavelength (nm) | coefficients | Electronic Transition             | $f$    | $R$      |
|-----|-----------------|--------------|-----------------------------------|--------|----------|
| 1   | 503.87          | 0.0797       | 130 HOMO $\rightarrow$ 131 LUMO   | 0.0797 | -11.5777 |
| 2   | 419.08          | 0.21926      | 129 HOMO-1 $\rightarrow$ 131 LUMO | 0.0344 | 28.4925  |
|     |                 | 0.66959      | 130 HOMO $\rightarrow$ 132 LUMO+1 |        |          |
| 3   | 400.22          | 0.66668      | 129 HOMO-1 $\rightarrow$ 131 LUMO | 0.0197 | -48.1803 |
|     |                 | -0.21768     | 130 HOMO $\rightarrow$ 132 LUMO+1 |        |          |

$R$ : Rotatory Strength ( $\times 10^{-40}$  esu $\cdot$ cm $\cdot$ erg/Gauss).

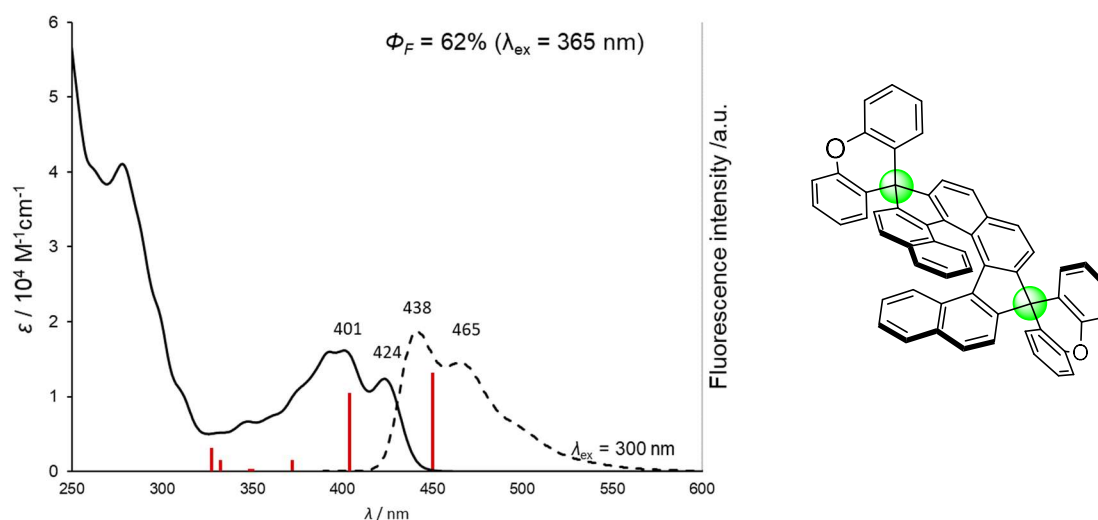

**Fig. S31** UV/Vis absorption spectra in  $\text{CH}_2\text{Cl}_2$  ( $1.1 \times 10^{-5}$  M, solid line), the calculated oscillator strengths  $f$  (red bars), and fluorescence spectra in  $\text{CH}_2\text{Cl}_2$  ( $2.4 \times 10^{-6}$  M, dashed line) of (*rac*)-**6CX**.

**Table S11** Calculated electronic transition of (*M*)-6CX.

| No. | Wavelength (nm) | coefficients | Electronic Transition             | $f$    | $R$      |
|-----|-----------------|--------------|-----------------------------------|--------|----------|
| 1   | 450.34          | 0.70072      | 192 HOMO $\rightarrow$ 193 LUMO   | 0.1316 | 55.1049  |
| 2   | 404.19          | 0.10549      | 191 HOMO-1 $\rightarrow$ 193 LUMO | 0.1049 | -26.4094 |
|     |                 | 0.69363      | 192 HOMO $\rightarrow$ 194 LUMO+1 |        |          |
| 3   | 372.41          | 0.68233      | 191 HOMO-1 $\rightarrow$ 193 LUMO | 0.0152 | -65.1929 |
|     |                 | 0.12996      | 192 HOMO $\rightarrow$ 195 LUMO+2 |        |          |

$R$ : Rotatory Strength ( $\times 10^{-40}$  esu $\cdot$ cm $\cdot$ erg/Gauss).

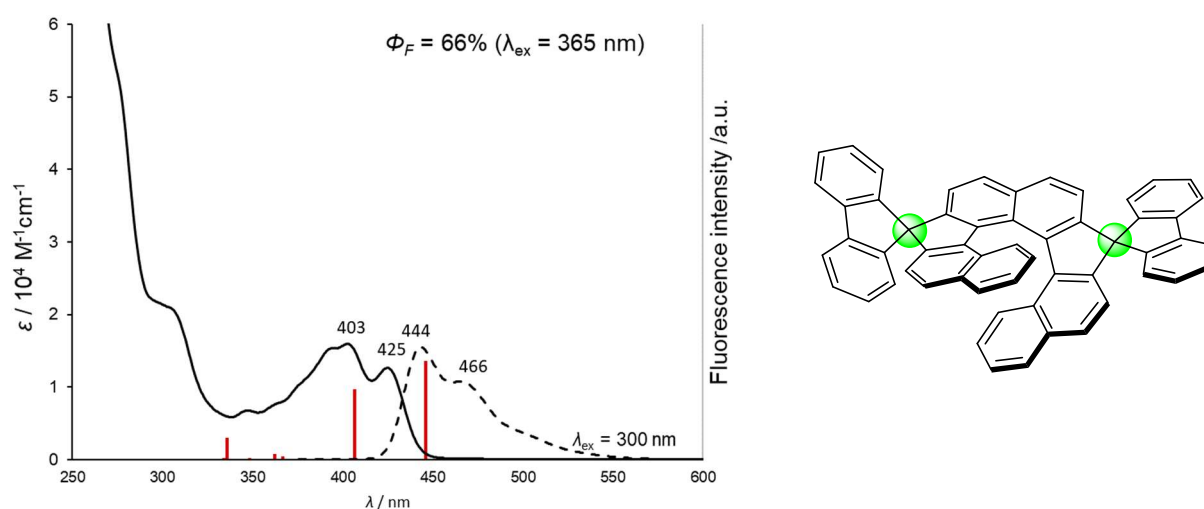

**Fig. S32** UV/Vis absorption spectra in  $\text{CH}_2\text{Cl}_2$  ( $1.0 \times 10^{-5}$  M, solid line), the calculated oscillator strengths  $f$  (red bars), and fluorescence spectra in  $\text{CH}_2\text{Cl}_2$  ( $2.4 \times 10^{-6}$  M, dashed line) of (*rac*)-6CF.

**Table S12** Calculated electronic transition of (*M*)-6CF.

| No. | Wavelength (nm) | coefficients | Electronic Transition             | $f$    | $R$      |
|-----|-----------------|--------------|-----------------------------------|--------|----------|
| 1   | 446.99          | 0.70061      | 184 HOMO $\rightarrow$ 185 LUMO   | 0.1358 | 25.1358  |
| 2   | 406.27          | 0.69784      | 184 HOMO $\rightarrow$ 186 LUMO+1 | 0.0970 | -31.3872 |
| 3   | 366.68          | 0.65582      | 183 HOMO-1 $\rightarrow$ 185 LUMO | 0.0049 | -39.2482 |
|     |                 | 0.15942      | 184 HOMO $\rightarrow$ 188 LUMO+3 |        |          |
|     |                 | 0.17591      | 184 HOMO $\rightarrow$ 189 LUMO+4 |        |          |

$R$ : Rotatory Strength ( $\times 10^{-40}$  esu $\cdot$ cm $\cdot$ erg/Gauss).

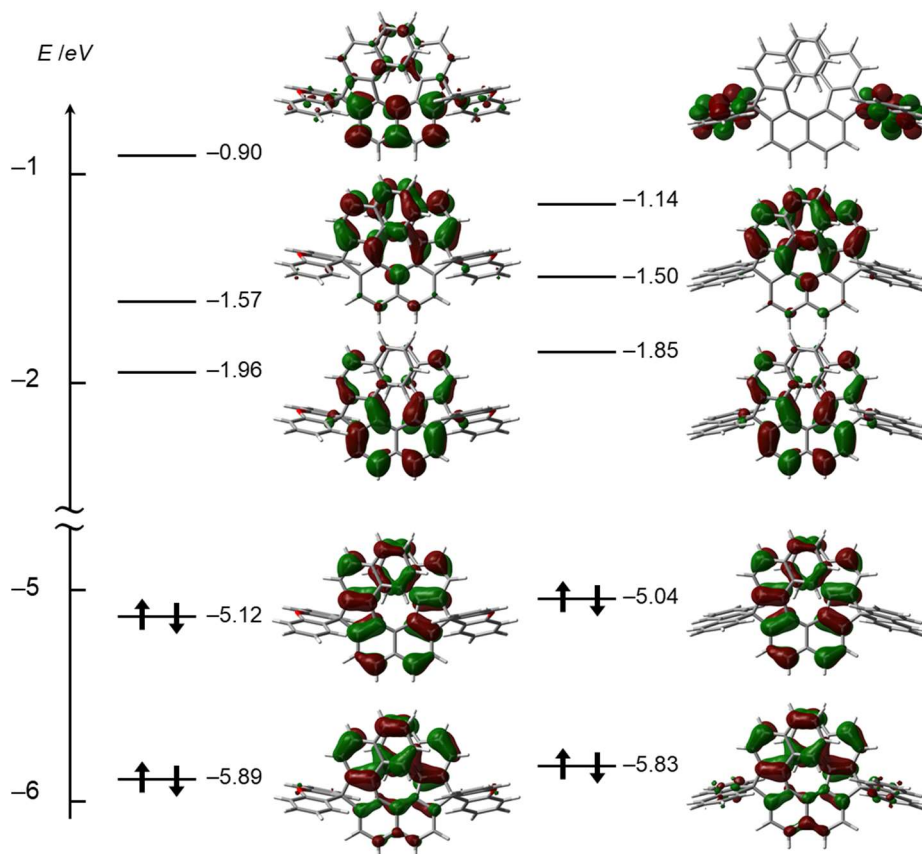

**Fig. S33** Kohn-Sham orbital representations of **6CX** and **6CF** (isovalue:0.03).

**Table S13** Summary of calculated electric and magnetic transition dipole moments and relative angle ( $\theta$ ) of the lowest energy electronic transitions.<sup>9</sup>

| Compound                               | Wavelength ( $f$ ) | $ \mu_e $ | $ \mu_m $ | $\theta$ | $R$     |
|----------------------------------------|--------------------|-----------|-----------|----------|---------|
| ( <i>M</i> )- <b>6N</b>                | 395 nm (0.054)     | 213.04    | 1.29      | 129°     | -171.88 |
| ( <i>M</i> )- <b>6O</b>                | 387 nm (0.079)     | 255.19    | 1.64      | 120°     | -211.59 |
| ( <i>M</i> )- <b>6S</b> <sup>[a]</sup> | 394 nm (0.040)     | 182.46    | 1.20      | 138°     | -162.84 |
| ( <i>M</i> )- <b>6CF</b>               | 447 nm (0.136)     | 359.32    | 0.07      | 0.0°     | 25.12   |
| ( <i>M</i> )- <b>6CX</b>               | 450 nm (0.132)     | 355.06    | 0.16      | 0.0°     | 55.09   |
| ( <i>M</i> )- <b>6SO<sub>2</sub></b>   | 504 nm (0.020)     | 292.20    | 0.04      | 180°     | -11.57  |

$\mu_e$ : transition electronic dipole moment ( $\times 10^{-20}$  esu·cm),  $\mu_m$ : transition magnetic dipole moment ( $\times 10^{-20}$  erg/Gauss),  $\theta$ : the angles of the transition electronic dipole moment and the transition magnetic dipole moment.

The rotatory strength  $R$  ( $\times 10^{-40}$  esu·cm·erg/Gauss) is defined as the imaginary part of scalar product of  $\mu_e$  and  $\mu_m$ .

$$R = \text{Im}(\mu_e \bullet \mu_m) = |\mu_e||\mu_m|\cos\theta$$

[a] According to TD-DFT calculation, the two lowest energy electronic transitions of **6S** were energetically degenerated, and the second lowest energy transition would be mainly responsible for the CD response. Thus, the parameters of the second lowest energy transition are shown here.



## Fluorescence life-time measurement

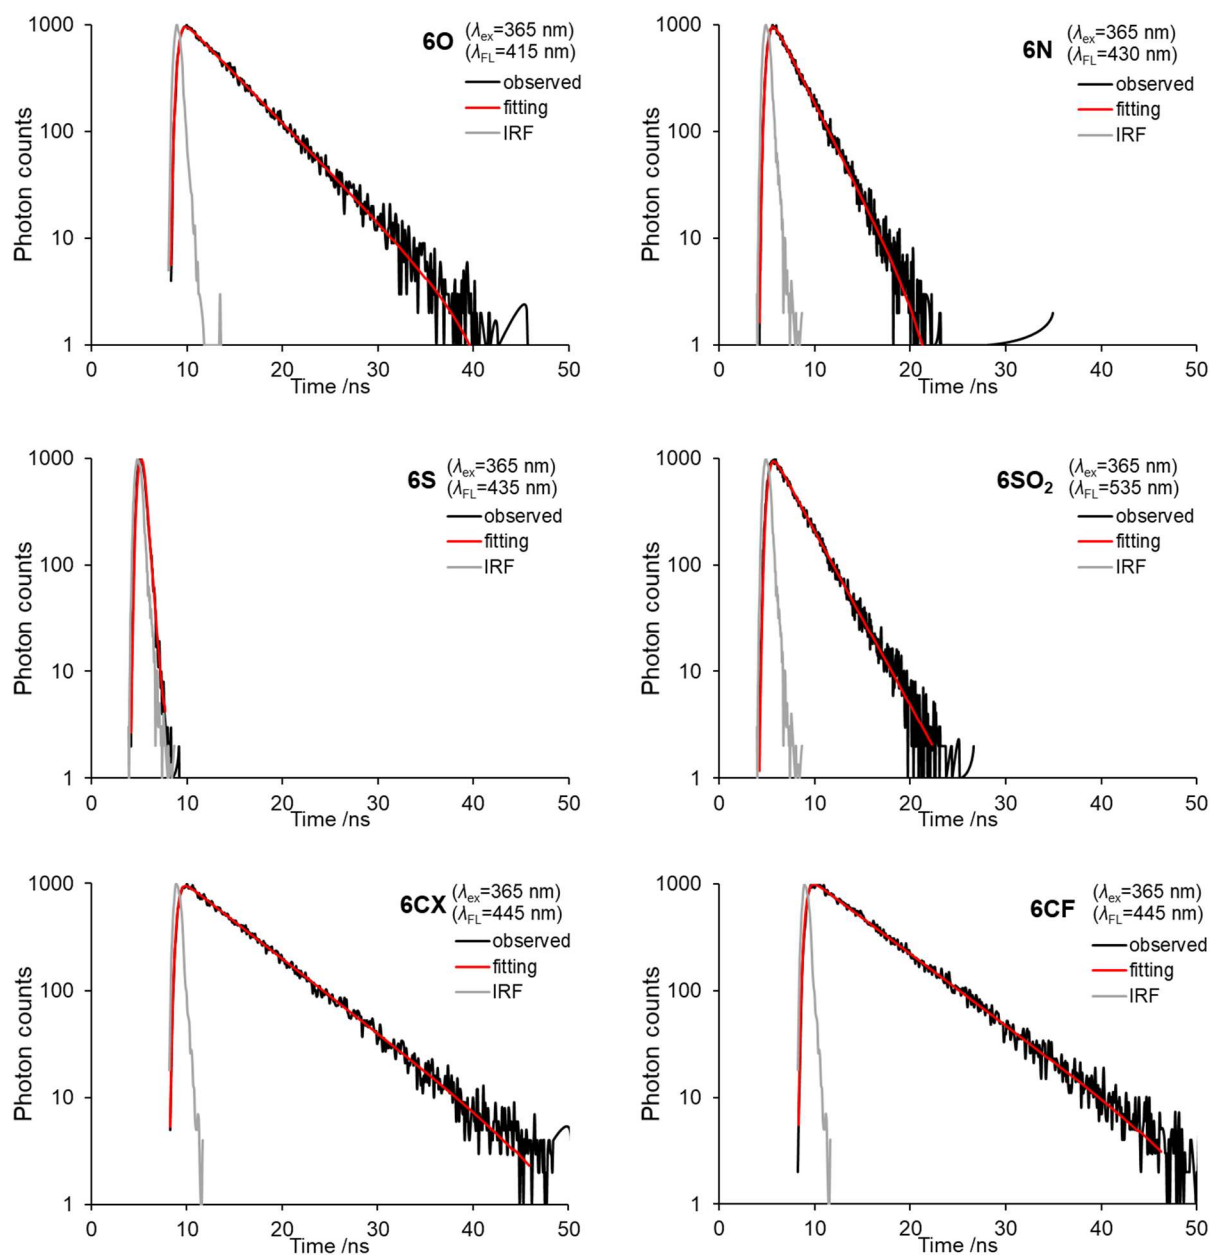

**Fig. S34** Fluorescence decay profiles of helicenes in  $\text{CH}_2\text{Cl}_2$  (IRF = instrumental response function). The concentration of samples was as same as that of fluorescence measurement.

## Circular Dichroism (CD) Spectra

$|g_{\text{abs}}|$  values shown in Table 1 are the average of the values of two isomers.

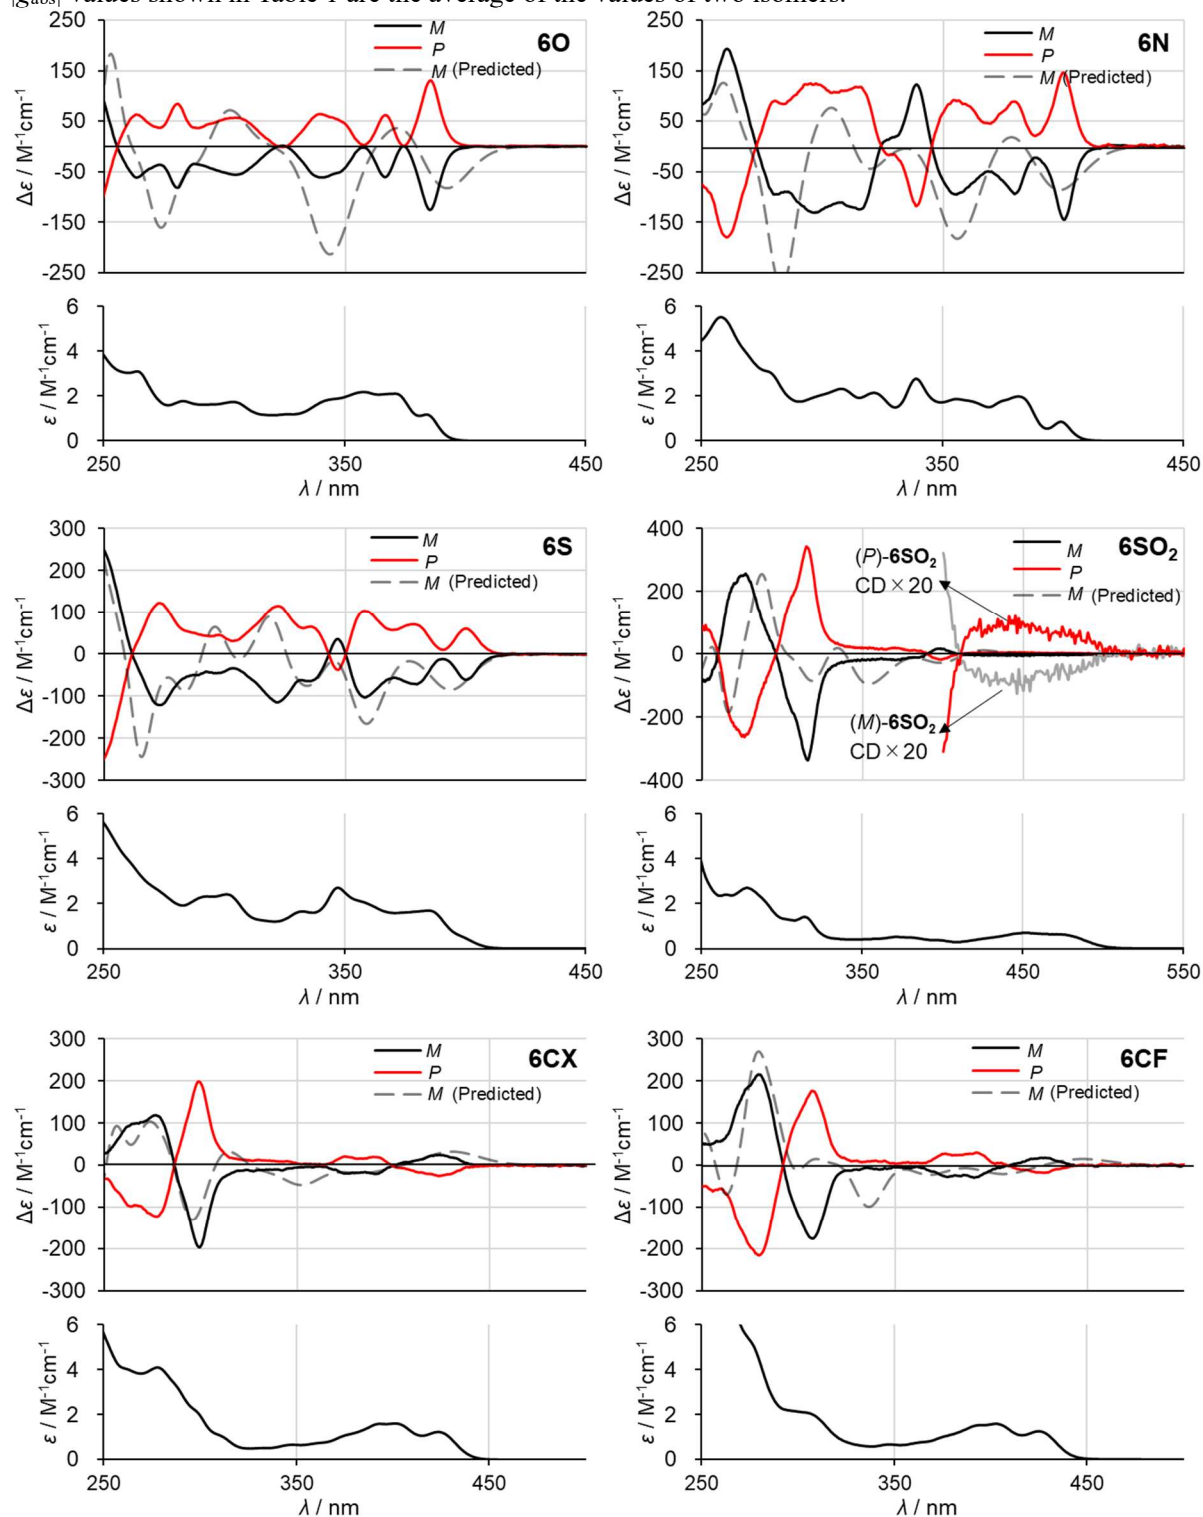

**Fig. S35** CD Spectra (top) and UV/Vis-absorption spectra (bottom) of helicenes in  $\text{CH}_2\text{Cl}_2$ . **6O** ( $M$ ):  $2.9 \times 10^{-5}$  M, ( $P$ ):  $2.7 \times 10^{-5}$  M), **6N** ( $M$ ):  $1.2 \times 10^{-5}$  M, ( $P$ ):  $8.6 \times 10^{-6}$  M), **6S** ( $M$ ):  $2.3 \times 10^{-5}$  M, ( $P$ ):  $2.4 \times 10^{-5}$  M), **6CF** ( $M$ ):  $1.3 \times 10^{-5}$  M, ( $P$ ):  $1.3 \times 10^{-5}$  M), **6CX** ( $M$ ):  $1.7 \times 10^{-5}$  M, ( $P$ ):  $1.7 \times 10^{-5}$  M), and **6SO<sub>2</sub>** ( $M$ ):  $2.6 \times 10^{-5}$  M, ( $P$ ):  $2.9 \times 10^{-5}$  M). Simulated CD spectra are shown as gray dashed lines (peak half-width: 0.1 eV).

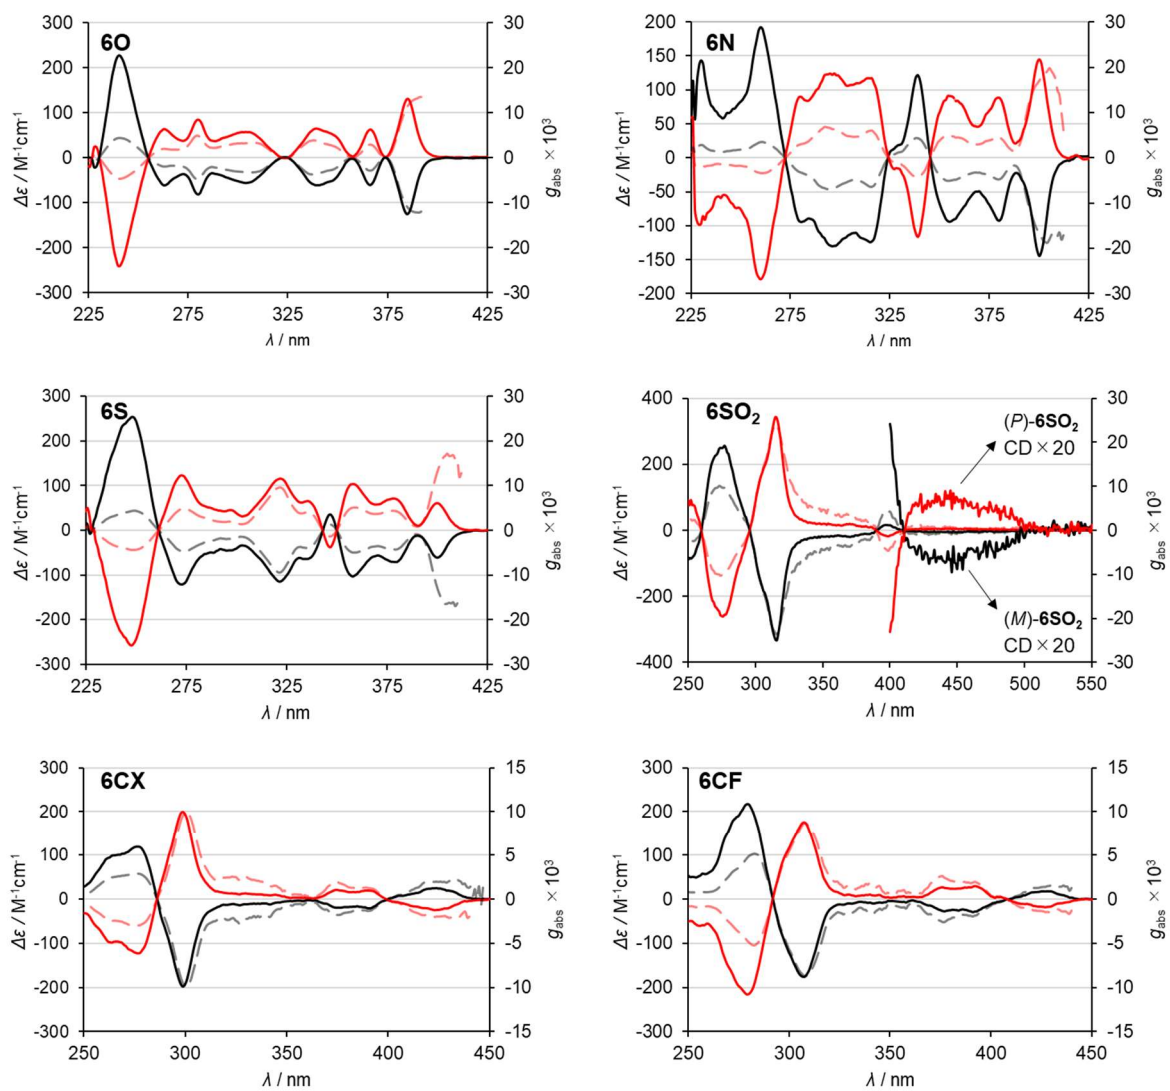

**Fig. S36** CD Spectra (solid lines) and  $g_{\text{abs}}$  values (dashed lines) of helicenes. The red lines were spectra from the (P)-isomers, and the black lines are the spectra of (M)-isomers.

### Circularly Polarized Luminescence (CPL) Spectra

$|g_{lum}|$  values shown in Table 1 are the average of the values of two isomers.

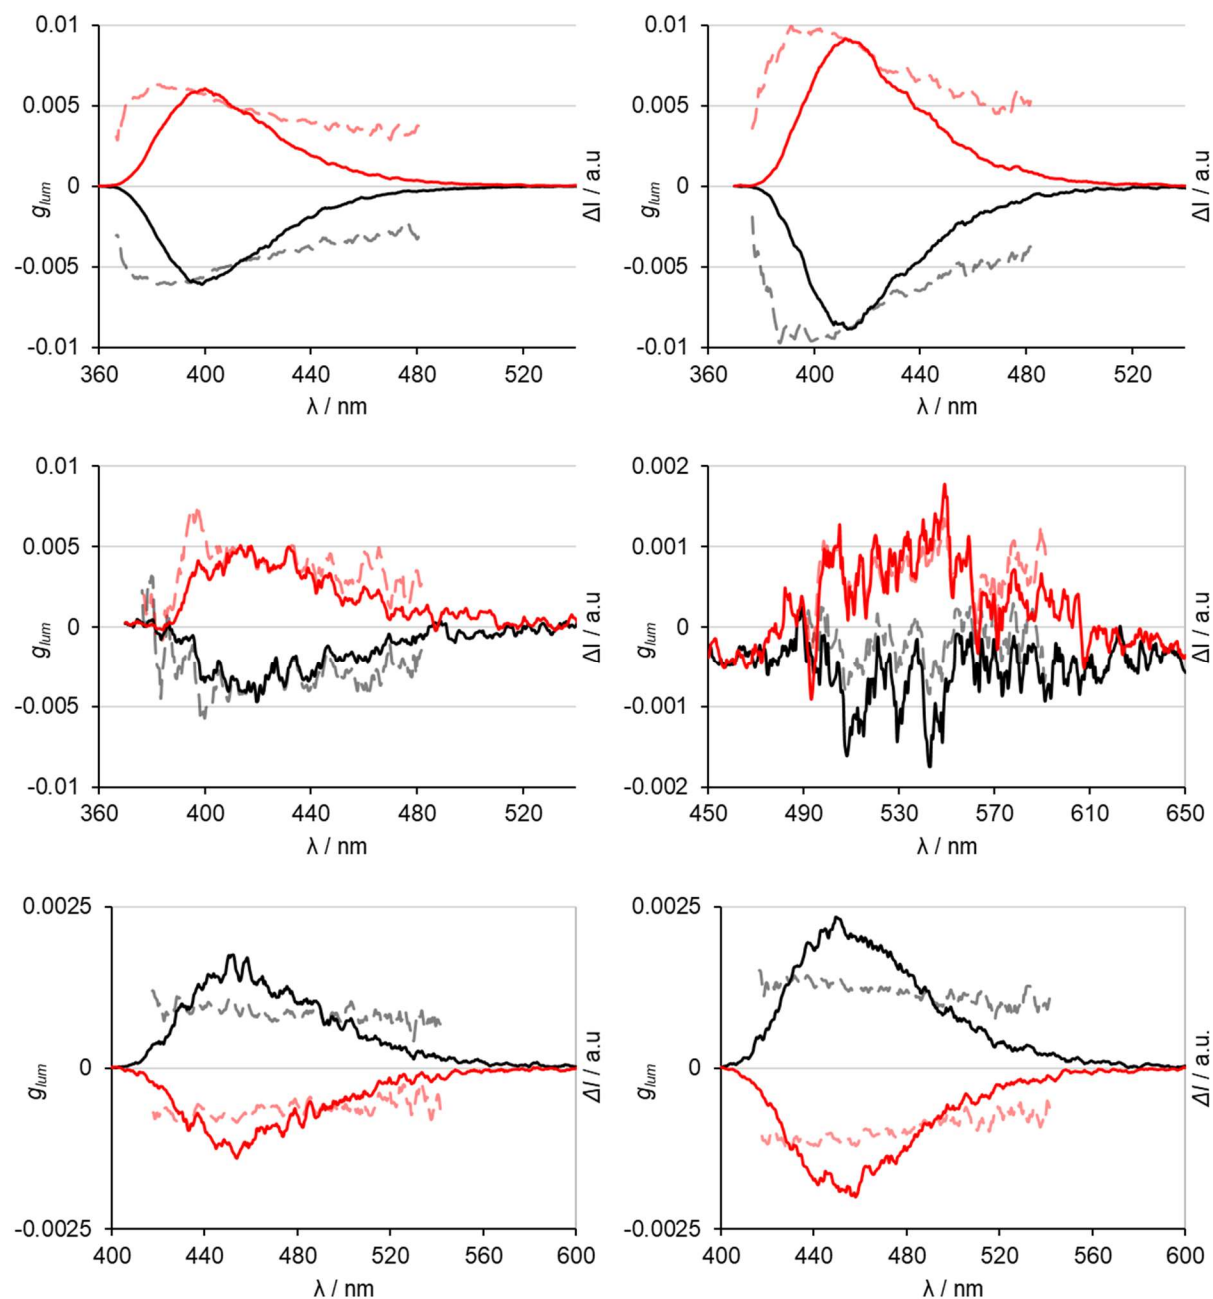

**Fig. S37** CPL Spectra (solid lines) and  $g_{lum}$  values (dashed lines) of helicenes in  $\text{CH}_2\text{Cl}_2$  ( $2.5 \times 10^{-6}$  M, excited at 300 nm). The red lines were spectra from the (*P*)-isomers, and the black lines are the spectra of (*M*)-isomers.

## Reference

---

- 1 (a) A. Altomare, M. C. Burla, M. Camalli, G. Cascarano, C. Giacovazzo, A. Guagliardi, A. G. G. Moliterni, G. Polidori, R. Spagna, R. *J. Appl. Cryst.*, 1999, **32**, 115; (b) G. M. Sheldrick, *Acta Cryst.*, 2008, **A64**, 112.
- 2 M. J. Frisch, G. W. Trucks, H. B. Schlegel, G. E. Scuseria, M. A. Robb, J. R. Cheeseman, G. Scalmani, V. Barone, G. A. Petersson, H. Nakatsuji, X. Li, M. Caricato, A. V. Marenich, J. Bloino, B. G. Janesko, R. Gomperts, B. Mennucci, H. P. Hratchian, J. V. Ortiz, A. F. Izmaylov, J. L. Sonnenberg, D. Williams-Young, F. Ding, F. Lipparini, F. Egidi, J. Goings, B. Peng, A. Petrone, T. Henderson, D. Ranasinghe, V. G. Zakrzewski, J. Gao, N. Rega, G. Zheng, W. Liang, M. Hada, M. Ehara, K. Toyota, R. Fukuda, J. Hasegawa, M. Ishida, T. Nakajima, Y. Honda, O. Kitao, H. Nakai, T. Vreven, K. Throssell, J. A. Montgomery, Jr., J. E. Peralta, F. Ogliaro, M. J. Bearpark, J. J. Heyd, E. N. Brothers, K. N. Kudin, V. N. Staroverov, T. A. Keith, R. Kobayashi, J. Normand, K. Raghavachari, A. P. Rendell, J. C. Burant, S. S. Iyengar, J. Tomasi, M. Cossi, J. M. Millam, M. Klene, C. Adamo, R. Cammi, J. W. Ochterski, R. L. Martin, K. Morokuma, O. Farkas, J. B. Foresman, and D. J. Fox, Gaussian, Inc., Wallingford CT, 2016.
- 3 (a) S. Maeda, Y. Harabuchi, Y. Sumiya, M. Takagi, K. Suzuki, M. Hatanaka, Y. Osada, T. Taketsugu, K. Morokuma, K. Ohno, GRRM17, see [http://iqce.jp/GRRM/index\\_e.shtml](http://iqce.jp/GRRM/index_e.shtml) (accessed date 17 Oct, 2020); (b) S. Maeda, K. Ohno, K. Morokuma, *Phys. Chem. Chem. Phys.*, 2013, **15**, 3683.
- 4 C. Y. Legault, CYLview, Version 1.0b, 2009, Université de Sherbrooke, (<http://www.cylview.org>).
- 5 T. Yanagi, S. Otsuka, Y. Kasuga, K. Fujimoto, K. Mukarami, K. Nogi, H. Yorimitsu, A. Osuka *J. Am. Chem. Soc.*, 2016, **138**, 14582.
- 6 H. Ghosh, R. Vavilala, A. M. Szpilman, *Tetrahedron Asymmetry*, 2015, **26**, 79.
- 7 A. Kaga, K. Nogi, H. Yorimitsu, *Chem. Eur. J.*, 2019, **25**, 14780.
- 8 R. H. Martin, M. J. Marchant, *Tetrahedron*, 1974, **30**, 347.
- 9 (a) H. Kubo, T. Hirose, T. Nakashima, T. Kawai, J. Hasegawa, K. Matsuda, *J. Phys. Chem. Lett.* 2021, **12**, 6868; (b) H. Tanaka, Y. Inoue, T. Mori, *ChemPhotoChem*, 2018, **2**, 386–402; (c) T. Mori, *Chem. Rev.* 2021, *in press* (DOI: 10.1021/acs.chemrev.0c01017).

## XYZ Coordinates and Energies

### • Structures of helicenes

6O

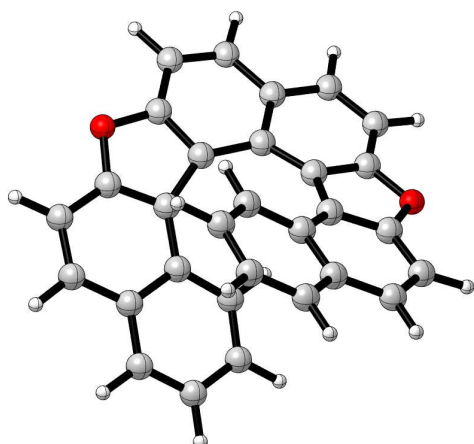

|   |             |             |             |
|---|-------------|-------------|-------------|
| C | 3.63061300  | 2.33777500  | 0.71831500  |
| C | 4.27414700  | 1.17234700  | 0.37770800  |
| C | 2.24420200  | 2.35910500  | 0.54404800  |
| C | 3.56033300  | -0.00000300 | -0.00000300 |
| C | 1.48557200  | 1.27635500  | 0.08329600  |
| C | 2.12036700  | -0.00000200 | -0.00000200 |
| O | 1.47397700  | 3.48066200  | 0.70251300  |
| C | 0.22194300  | 3.14903700  | 0.24784200  |
| C | 0.17687800  | 1.83625100  | -0.21940900 |
| H | 4.16036200  | 3.22179900  | 1.04717800  |
| H | 5.35621000  | 1.12288700  | 0.41164700  |
| C | -0.86861300 | 4.02692200  | 0.25599200  |
| C | -0.98843700 | 1.41257600  | -0.93075400 |
| C | -2.12561700 | 2.28493500  | -0.90864300 |
| C | -2.04210900 | 3.56457900  | -0.28656000 |
| H | -0.77213900 | 5.02031100  | 0.67403500  |
| H | -2.9224100  | 4.19718600  | -0.29102600 |
| C | 3.63060800  | -2.33778300 | -0.71831500 |
| C | 4.27414500  | -1.17235600 | -0.37771100 |
| C | 2.24419700  | -2.35911000 | -0.54404400 |
| C | 1.48556900  | -1.27635700 | -0.08329500 |
| O | 1.47397000  | -3.48066500 | -0.70250900 |
| C | 0.22193600  | -3.14903600 | -0.24783900 |
| C | 0.17687400  | -1.83625000 | 0.21941200  |
| H | 4.16035300  | -3.22181000 | -1.04717600 |
| H | 5.35620800  | -1.12289800 | -0.41165100 |
| C | -0.86862100 | -4.02692000 | -0.25599100 |
| C | -0.98844000 | -1.41257500 | 0.93075500  |
| C | -2.12562300 | -2.28493100 | 0.90864000  |
| C | -2.04211800 | -3.56457400 | 0.28655700  |
| H | -0.77214700 | -5.02030900 | -0.67403500 |
| H | -2.92250000 | -4.19718000 | 0.29102200  |
| C | -3.31372600 | -1.87378000 | 1.55998300  |
| C | -1.06017300 | -0.23248000 | 1.70334300  |
| C | -3.37033000 | -0.68757000 | 2.25151300  |
| C | -2.22303900 | 0.12491400  | 2.34480200  |
| H | -4.17923900 | -2.52613800 | 1.51801400  |
| H | -4.28654100 | -0.38775500 | 2.74637600  |
| H | -0.18303000 | 0.38836000  | 1.79840600  |
| H | -2.25502200 | 1.03875500  | 2.92614600  |
| C | -1.06017100 | 0.23248000  | -1.70333900 |
| H | -0.18303100 | -0.38836300 | -1.79839900 |
| C | -3.31372000 | 1.87378800  | -1.55998800 |
| H | -4.17923200 | 2.52614600  | -1.51801900 |
| C | -3.37032600 | 0.68757700  | -2.25151600 |
| C | -2.22303700 | -0.12491100 | -2.34480000 |

H -2.25502200 -1.03875100 -2.92614600  
H -4.28653700 0.38776300 -2.74638100

E(RB3LYP) = -1303.74580389  
Zero-point correction=0.367404 (Hartree/Particle)  
Thermal correction to Energy= 0.435525  
Thermal correction to Enthalpy= 0.437213  
Thermal correction to Gibbs Free Energy= 0.249813  
Sum of electronic and zero-point Energies  
= -1303.378400  
Sum of electronic and thermal Energies  
= -1303.310279  
Sum of electronic and thermal Enthalpies  
= -1303.308591  
Sum of electronic and thermal Free Energies  
= -1303.495991 (unit: a.u.)

6O-TS

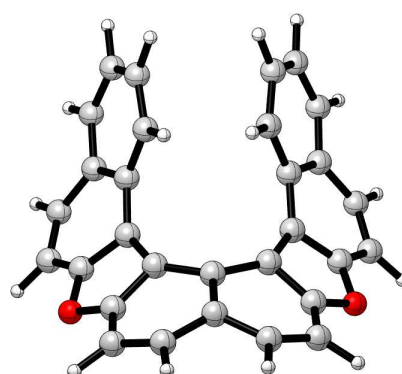

|   |             |             |             |
|---|-------------|-------------|-------------|
| C | -0.39852200 | 3.74824300  | 2.32994000  |
| C | -1.01145800 | 4.18938600  | 1.19232700  |
| C | 0.05983400  | 2.43285900  | 2.29780800  |
| C | -0.97215700 | 3.41027500  | 0.00000000  |
| C | -0.23707600 | 1.47453800  | 1.30895800  |
| C | -0.58924900 | 2.01227400  | 0.00000000  |
| O | 0.85950000  | 1.93326300  | 3.28598200  |
| C | 1.00169600  | 0.60210400  | 3.01780800  |
| C | 0.23554300  | 0.22092900  | 1.91674100  |
| H | -0.23749200 | 4.36948400  | 3.20038800  |
| H | -1.37742000 | 5.20673000  | 1.12662400  |
| C | 1.79691800  | -0.25747100 | 3.78915000  |
| C | -0.12778800 | -1.16866100 | 1.89851700  |
| C | 0.67267200  | -2.08602300 | 2.66066300  |
| C | 1.69163400  | -1.59888300 | 3.53119300  |
| H | 2.44644200  | 0.14312500  | 4.55625100  |
| H | 2.29413500  | -2.31288900 | 4.08026100  |
| C | -0.39852200 | 3.74824300  | -2.32994000 |
| C | -1.01145800 | 4.18938600  | -1.19232700 |
| C | 0.05983400  | 2.43285900  | -2.29780800 |
| C | -0.23707600 | 1.47453800  | -1.30895800 |
| O | 0.85950000  | 1.93326300  | -3.28598200 |
| C | 1.00169600  | 0.60210400  | -3.01780800 |
| C | 0.23554300  | 0.22092900  | -1.91674100 |
| H | -0.23749200 | 4.36948400  | -3.20038800 |
| H | -1.37742000 | 5.20673000  | -1.12662400 |
| C | 1.79691800  | -0.25747100 | -3.78915000 |
| C | -0.12778800 | -1.16866100 | -1.89851700 |
| C | 0.67267200  | -2.08602300 | -2.66066300 |
| C | 1.69163400  | -1.59888300 | -3.53119300 |
| H | 2.44644200  | 0.14312500  | -4.55625100 |
| H | 2.29413500  | -2.31288900 | -4.08026100 |

|   |             |             |             |
|---|-------------|-------------|-------------|
| C | 0.30332100  | -3.45075800 | -2.69616800 |
| C | -1.37487100 | -1.62229500 | -1.42981100 |
| C | -0.89316900 | -3.87321800 | -2.16428500 |
| C | -1.76311100 | -2.93394200 | -1.58547000 |
| H | 0.94423300  | -4.14656400 | -3.22669700 |
| H | -1.18922600 | -4.91264200 | -2.24074100 |
| H | -2.05984500 | -0.89625600 | -1.01784700 |
| H | -2.74635900 | -3.24558000 | -1.25559800 |
| C | -1.37487100 | -1.62229500 | 1.42981100  |
| H | -2.05984500 | -0.89625600 | 1.01784700  |
| C | 0.30332100  | -3.45075800 | 2.69616800  |
| H | 0.94423300  | -4.14656400 | 3.22669700  |
| C | -0.89316900 | -3.87321800 | 2.16428500  |
| C | -1.76311100 | -2.93394200 | 1.58547000  |
| H | -2.74635900 | -3.24558000 | 1.25559800  |
| H | -1.18922600 | -4.91264200 | 2.24074100  |

Imaginary frequency:  $-41.16 \text{ cm}^{-1}$   
 E(RB3LYP) = -1303.67164007  
 Zero-point correction= 0.366304 (Hartree/Particle)  
 Thermal correction to Energy= 0.433006  
 Thermal correction to Enthalpy= 0.434695  
 Thermal correction to Gibbs Free Energy= 0.252105  
 Sum of electronic and zero-point Energies  
 = -1303.305336  
 Sum of electronic and thermal Energies  
 = -1303.238634  
 Sum of electronic and thermal Enthalpies  
 = -1303.236945  
 Sum of electronic and thermal Free Energies  
 = -1303.419535 (unit: a.u.)

6S

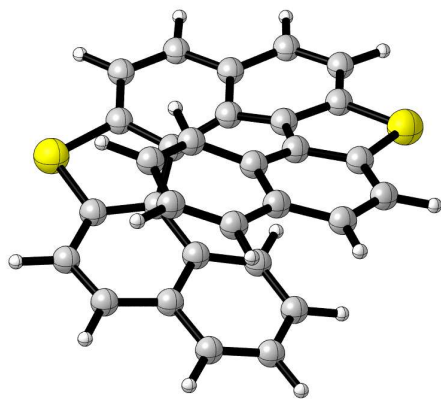

|   |             |             |             |
|---|-------------|-------------|-------------|
| C | -3.56362100 | 2.41075500  | -0.29822400 |
| C | -4.21578400 | 1.21568200  | -0.15652500 |
| C | -2.17090100 | 2.42680400  | -0.11587400 |
| C | -3.49882700 | -0.00013500 | -0.00001100 |
| C | -1.41602700 | 1.27458100  | 0.18190600  |
| C | -2.06131000 | -0.00007900 | -0.00000600 |
| S | -1.19505100 | 3.87812000  | -0.19936300 |
| C | 0.22126700  | 2.97660000  | 0.29805700  |
| C | -0.05895800 | 1.63165400  | 0.57542600  |
| H | -4.10373200 | 3.32885200  | -0.49281800 |
| H | -5.29799200 | 1.17360800  | -0.19782000 |
| C | 1.51588900  | 3.52392600  | 0.38024700  |
| C | 0.96848500  | 0.86180400  | 1.22090200  |
| C | 2.29716000  | 1.39102200  | 1.24156100  |
| C | 2.54316200  | 2.71457400  | 0.78234300  |
| H | 1.69095600  | 4.55639400  | 0.10367200  |
| H | 3.55864000  | 3.09279200  | 0.80980300  |

|   |             |             |             |
|---|-------------|-------------|-------------|
| C | -3.56343000 | -2.41103200 | 0.29820800  |
| C | -4.21568500 | -1.21600900 | 0.15649800  |
| C | -2.17070800 | -2.42697400 | 0.11587700  |
| C | -1.41592700 | -1.27469000 | -0.18190000 |
| S | -1.19473400 | -3.87820700 | 0.19940000  |
| C | 0.22151400  | -2.97657300 | -0.29802600 |
| C | -0.05882100 | -1.63165300 | -0.57540500 |
| H | -4.10348000 | -3.32916500 | 0.49280800  |
| H | -5.29789700 | -1.17402300 | 0.19778900  |
| C | 1.51617900  | -3.52379500 | -0.38021400 |
| C | 0.96855300  | -0.86172600 | -1.22090200 |
| C | 2.29727400  | -1.39083700 | -1.24155500 |
| C | 2.54338400  | -2.71436200 | -0.78232100 |
| H | 1.69133800  | -4.55624400 | -0.10362800 |
| H | 3.55889300  | -3.09249900 | -0.80977800 |
| C | 3.34605000  | -0.60202700 | -1.76994800 |
| C | 0.73381400  | 0.36948100  | -1.87418200 |
| C | 3.09482500  | 0.62946500  | -2.32567800 |
| C | 1.77095000  | 1.10024500  | -2.40772300 |
| H | 4.35446200  | -1.00012800 | -1.74641100 |
| H | 3.90648400  | 1.22517400  | -2.72636700 |
| H | -0.27763700 | 0.73616700  | -1.96253300 |
| H | 1.56365800  | 2.04730400  | -2.89112200 |
| C | 0.73384800  | -0.36944800 | 1.87413900  |
| H | -0.27757600 | -0.73621900 | 1.96246900  |
| C | 3.34600000  | 0.60228900  | 1.76994400  |
| H | 4.35437800  | 1.00047700  | 1.74642000  |
| C | 3.09487700  | -0.62923600 | 2.32564700  |
| C | 1.77104200  | -1.10013800 | 2.40766500  |
| H | 1.56383000  | -2.04723100 | 2.89103100  |
| H | 3.90658500  | -1.22488300 | 2.72632900  |

E(RB3LYP) = -1949.71950091  
 Zero-point correction= 0.361192 (Hartree/Particle)  
 Thermal correction to Energy= 0.431607  
 Thermal correction to Enthalpy= 0.433295  
 Thermal correction to Gibbs Free Energy= 0.241375  
 Sum of electronic and zero-point Energies  
 = -1949.358309  
 Sum of electronic and thermal Energies  
 = -1949.287894  
 Sum of electronic and thermal Enthalpies  
 = -1949.286206  
 Sum of electronic and thermal Free Energies  
 = -1949.478126 (unit: a.u.)

6S-TS

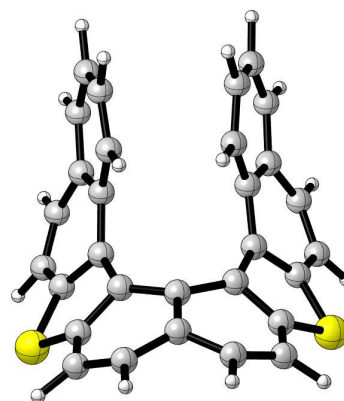

|   |            |            |             |
|---|------------|------------|-------------|
| C | 3.57644700 | 2.30393800 | -0.75614700 |
| C | 3.92044100 | 1.20192800 | -1.48495300 |
| C | 2.34319100 | 2.27783200 | -0.08538800 |

|   |             |             |             |
|---|-------------|-------------|-------------|
| C | 3.16646200  | 0.00159300  | -1.35202900 |
| C | 1.35898000  | 1.29367200  | -0.30774500 |
| C | 1.84738700  | 0.00086900  | -0.77551900 |
| S | 1.91830600  | 3.39647400  | 1.19999400  |
| C | 0.30984000  | 2.70402800  | 1.28685500  |
| C | 0.10097600  | 1.74129200  | 0.29249600  |
| H | 4.23836000  | 3.15594400  | -0.66628300 |
| H | 4.87049300  | 1.16174300  | -2.00446500 |
| C | -0.72738800 | 3.17483100  | 2.12246200  |
| C | -1.24322900 | 1.66727900  | -0.21058300 |
| C | -2.31238600 | 2.16156700  | 0.60189900  |
| C | -2.01535400 | 2.81596200  | 1.83287100  |
| H | -0.50036600 | 3.82597000  | 2.95766100  |
| H | -2.83297600 | 3.15021100  | 2.46117900  |
| C | 3.57856500  | -2.30061500 | -0.75709600 |
| C | 3.92153200  | -1.19799700 | -1.48546200 |
| C | 2.34534700  | -2.27587700 | -0.08621400 |
| C | 1.36021600  | -1.29252400 | -0.30808600 |
| S | 1.92167800  | -3.39535700 | 1.19882900  |
| C | 0.31262700  | -2.70435600 | 1.28623500  |
| C | 0.10272100  | -1.74144000 | 0.29227000  |
| H | 4.24125000  | -3.15206100 | -0.66761300 |
| H | 4.87152900  | -1.15673800 | -2.00499100 |
| C | -0.72399500 | -3.17634600 | 2.12192200  |
| C | -1.24168600 | -1.66829000 | -0.21039500 |
| C | -2.31022200 | -2.16378600 | 0.60217400  |
| C | -2.01233200 | -2.81844400 | 1.83279600  |
| H | -0.49621400 | -3.82760800 | 2.95681900  |
| H | -2.82951700 | -3.15361900 | 2.46118000  |
| C | -3.62234500 | -2.17939100 | 0.07651700  |
| C | -1.50683800 | -1.41343600 | -1.57198800 |
| C | -3.85334100 | -1.88633600 | -1.24797100 |
| C | -2.77458800 | -1.55772200 | -2.08684500 |
| H | -4.43435600 | -2.50676200 | 0.71663800  |
| H | -4.85564000 | -1.95080700 | -1.65447600 |
| H | -0.67899800 | -1.16128400 | -2.22126100 |
| H | -2.94569700 | -1.39566200 | -3.14431900 |
| C | -1.50777600 | 1.41287700  | -1.57238200 |
| H | -0.67954100 | 1.16170600  | -2.22153800 |
| C | -3.62437200 | 2.17635800  | 0.07587300  |
| H | -4.43682900 | 2.50278300  | 0.71590900  |
| C | -3.85474700 | 1.88375800  | -1.24882400 |
| C | -2.77548400 | 1.55642500  | -2.08754700 |
| H | -2.94614700 | 1.39479000  | -3.14516000 |
| H | -4.85697900 | 1.94763200  | -1.65559100 |

Imaginary frequency:  $-36.36 \text{ cm}^{-1}$   
 E(RB3LYP) = -1949.63724540  
 Zero-point correction = 0.359641 (Hartree/Particle)  
 Thermal correction to Energy = 0.428879  
 Thermal correction to Enthalpy = 0.430567  
 Thermal correction to Gibbs Free Energy = 0.241582  
 Sum of electronic and zero-point Energies  
 = -1949.277604  
 Sum of electronic and thermal Energies  
 = -1949.208366  
 Sum of electronic and thermal Enthalpies  
 = -1949.206678  
 Sum of electronic and thermal Free Energies  
 = -1949.395664 (unit: a.u.)

6N

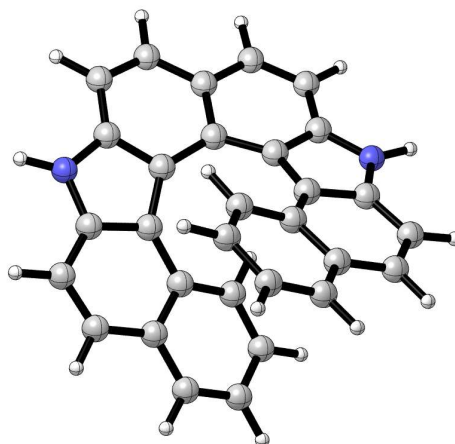

|   |             |             |             |
|---|-------------|-------------|-------------|
| C | 3.63966900  | -2.36534700 | -0.61838200 |
| C | 4.28803100  | -1.19097400 | -0.32423400 |
| C | 2.24599100  | -2.39668400 | -0.44068500 |
| C | 3.57928100  | -0.00001000 | 0.00000100  |
| C | 1.50020300  | -1.27554900 | -0.00328800 |
| C | 2.14162800  | -0.00000600 | 0.00000100  |
| N | 1.38850300  | -3.47087000 | -0.56069500 |
| C | 0.13178700  | -3.10803000 | -0.11222400 |
| C | 0.17548300  | -1.76692200 | 0.31765100  |
| H | 4.18501100  | -3.25125800 | -0.92189300 |
| H | 5.37057000  | -1.14670800 | -0.36458700 |
| C | -1.04432200 | -3.88154400 | -0.09236400 |
| C | -0.95311400 | -1.24285400 | 1.02357700  |
| C | -2.16108800 | -2.01195900 | 1.01265700  |
| C | -2.17941900 | -3.30923700 | 0.42094200  |
| H | -1.05014900 | -4.89319300 | -0.48188800 |
| H | -3.11014200 | -3.86518700 | 0.42946100  |
| C | 3.63968300  | 2.36532700  | 0.61838200  |
| C | 4.28803800  | 1.19095000  | 0.32423600  |
| C | 2.24600500  | 2.39667300  | 0.44068400  |
| C | 1.50021100  | 1.27554100  | 0.00328900  |
| N | 1.38852400  | 3.47086500  | 0.56069000  |
| C | 0.13180700  | 3.10803200  | 0.11221900  |
| C | 0.17549500  | 1.76692300  | -0.31765300 |
| H | 4.18503000  | 3.25123600  | 0.92189200  |
| H | 5.37057700  | 1.14667800  | 0.36458700  |
| C | -1.04429800 | 3.88155300  | 0.09235600  |
| C | -0.95310600 | 1.24285900  | -1.02357600 |
| C | -2.16107500 | 2.01197200  | -1.01266000 |
| C | -2.17939700 | 3.30925300  | -0.42095000 |
| H | -1.05011700 | 4.89320300  | 0.48187800  |
| H | -3.11011700 | 3.86520900  | -0.42947100 |
| C | -3.31312700 | 1.48824800  | -1.64528200 |
| C | -0.92528700 | 0.05348800  | -1.78613100 |
| C | -3.27156400 | 0.29016700  | -2.31918300 |
| C | -2.05674100 | -0.41514800 | -2.41409000 |
| H | -4.23231700 | 2.06302200  | -1.60456600 |
| H | -4.16241600 | -0.09769700 | -2.79925200 |
| H | 0.00411500  | -0.48572000 | -1.88273400 |
| H | -2.01025700 | -1.33539200 | -2.98451400 |
| C | -0.92528500 | -0.05348900 | 1.78614000  |
| H | 0.00412100  | 0.48571100  | 1.88274700  |
| C | -3.31313700 | -1.48823000 | 1.64528100  |
| H | -4.23233000 | -2.06299600 | 1.60456100  |
| C | -3.27156400 | -0.29015200 | 2.31919000  |
| C | -2.05673600 | 0.41515200  | 2.41410200  |
| H | -2.01024400 | 1.33539100  | 2.98453300  |
| H | -4.16241300 | 0.09771500  | 2.79926100  |
| H | 1.66376700  | -4.40527600 | -0.81131100 |
| H | 1.66379400  | 4.40526900  | 0.81130600  |



E(RB3LYP) = -1264.02961283  
 Zero-point correction= 0.392111 (Hartree/Particle)  
 Thermal correction to Energy= 0.462469  
 Thermal correction to Enthalpy= 0.464158  
 Thermal correction to Gibbs Free Energy= 0.272929  
 Sum of electronic and zero-point Energies  
 = -1263.637502  
 Sum of electronic and thermal Energies  
 = -1263.567143  
 Sum of electronic and thermal Enthalpies  
 = -1263.565455  
 Sum of electronic and thermal Free Energies  
 = -1263.756684 (unit: a.u.)

### 6N-TS

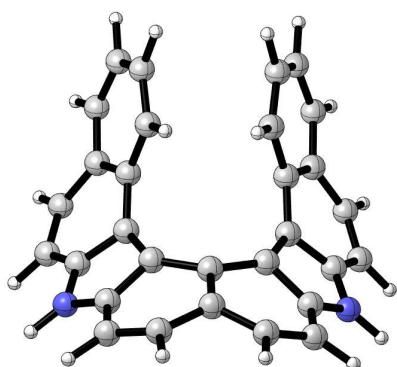

|   |             |             |             |
|---|-------------|-------------|-------------|
| C | 3.75973100  | 2.31960400  | -0.42654500 |
| C | 4.17789100  | 1.19289700  | -1.07140000 |
| C | 2.45352000  | 2.30070800  | 0.08207100  |
| C | 3.39884900  | 0.00000000  | -1.02275400 |
| C | 1.48217400  | 1.30587400  | -0.22754700 |
| C | 2.01572600  | 0.00000000  | -0.60143500 |
| N | 1.90005800  | 3.23380500  | 0.92688000  |
| C | 0.56355700  | 2.96173200  | 1.09550400  |
| C | 0.22640700  | 1.86374500  | 0.27654100  |
| H | 4.40386700  | 3.17956700  | -0.28766000 |
| H | 5.18297300  | 1.13191200  | -1.47180800 |
| C | -0.36642400 | 3.65325800  | 1.89988100  |
| C | -1.15060400 | 1.83060400  | -0.13301900 |
| C | -2.12011900 | 2.52414300  | 0.66627900  |
| C | -1.69227900 | 3.35435800  | 1.74550900  |
| H | -0.03164800 | 4.40294100  | 2.60760900  |
| H | -2.44165800 | 3.84653000  | 2.35469700  |
| C | 3.75973100  | -2.31960400 | -0.42654500 |
| C | 4.17789100  | -1.19289700 | -1.07140000 |
| C | 2.45352000  | -2.30070800 | 0.08207100  |
| C | 1.48217400  | -1.30587400 | -0.22754700 |
| N | 1.90005800  | -3.23380500 | 0.92688000  |
| C | 0.56355700  | -2.96173200 | 1.09550400  |
| C | 0.22640700  | -1.86374500 | 0.27654100  |
| H | 4.40386700  | -3.17956700 | -0.28766000 |
| H | 5.18297300  | -1.13191200 | -1.47180800 |
| C | -0.36642400 | -3.65325800 | 1.89988100  |
| C | -1.15060400 | -1.83060400 | -0.13301900 |
| C | -2.12011900 | -2.52414300 | 0.66627900  |
| C | -1.69227900 | -3.35435800 | 1.74550900  |
| H | -0.03164800 | -4.40294100 | 2.60760900  |
| H | -2.44165800 | -3.84653000 | 2.35469700  |
| C | -3.46843000 | -2.54985000 | 0.24389800  |
| C | -1.54375900 | -1.41923000 | -1.42120300 |
| C | -3.83016000 | -2.07645800 | -0.99736800 |
| C | -2.84218100 | -1.56755200 | -1.85583200 |
| H | -4.20234800 | -3.02843300 | 0.88368300  |

|   |             |             |             |
|---|-------------|-------------|-------------|
| H | -4.85854300 | -2.14565600 | -1.33165200 |
| H | -0.78215600 | -1.05284100 | -2.09448800 |
| H | -3.10538500 | -1.27975700 | -2.86640600 |
| C | -1.54375900 | 1.41923000  | -1.42120300 |
| H | -0.78215600 | 1.05284100  | -2.09448800 |
| C | -3.46843000 | 2.54985000  | 0.24389800  |
| H | -4.20234800 | 3.02843300  | 0.88368300  |
| C | -3.83016000 | 2.07645800  | -0.99736800 |
| C | -2.84218100 | 1.56755200  | -1.85583200 |
| H | -3.10538500 | 1.27975700  | -2.86640600 |
| H | -4.85854300 | 2.14565600  | -1.33165200 |
| H | 2.39483400  | -4.01121800 | 1.32983400  |
| H | 2.39483400  | 4.01121800  | 1.32983400  |

Imaginary frequency:  $-40.08 \text{ cm}^{-1}$   
 E(RB3LYP) = -1263.95187076  
 Zero-point correction= 0.390747 (Hartree/Particle)  
 Thermal correction to Energy= 0.459835  
 Thermal correction to Enthalpy= 0.461523  
 Thermal correction to Gibbs Free Energy= 0.274685  
 Sum of electronic and zero-point Energies  
 = -1263.561124  
 Sum of electronic and thermal Energies  
 = -1263.492036  
 Sum of electronic and thermal Enthalpies  
 = -1263.490348  
 Sum of electronic and thermal Free Energies  
 = -1263.677186 (unit: a.u.)

### 6SO<sub>2</sub>

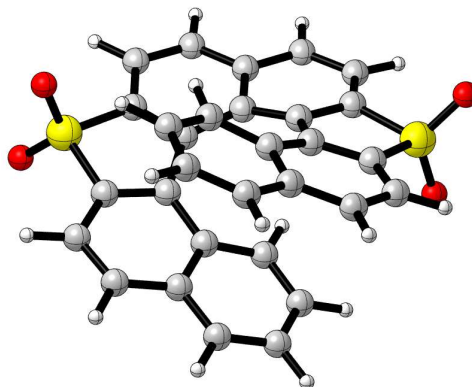

|   |             |             |             |
|---|-------------|-------------|-------------|
| C | 2.42336500  | 3.40111100  | -0.15570700 |
| C | 1.22382100  | 4.06680500  | -0.08401700 |
| C | 2.40191500  | 2.02005800  | 0.04757800  |
| C | 0.00004200  | 3.35441100  | -0.00004400 |
| C | 1.25506800  | 1.26807200  | 0.25673500  |
| C | 0.00002700  | 1.90773000  | -0.00001700 |
| S | 3.83977000  | 0.94929100  | -0.07221700 |
| C | 2.89209200  | -0.46233900 | 0.47327600  |
| C | 1.57009000  | -0.11806300 | 0.70073400  |
| H | 3.36112500  | 3.92268700  | -0.29755400 |
| H | 1.19148300  | 5.14901600  | -0.11831200 |
| C | 3.41355900  | -1.74767400 | 0.63565600  |
| C | 0.73396800  | -1.08133100 | 1.34078800  |
| C | 1.22319200  | -2.42771200 | 1.43624200  |
| C | 2.55412800  | -2.73418400 | 1.05626900  |
| H | 4.45235600  | -1.95297700 | 0.41137700  |
| H | 2.89788700  | -3.75794900 | 1.14564600  |
| C | -2.42327900 | 3.40116700  | 0.15563400  |
| C | -1.22372200 | 4.06683400  | 0.08391000  |
| C | -2.40186000 | 2.02010700  | -0.04760800 |
| C | -1.25503000 | 1.26809000  | -0.25674100 |
| S | -3.83973700 | 0.94936600  | 0.07224800  |
| C | -2.89207900 | -0.46230800 | -0.47318400 |

|   |             |             |             |
|---|-------------|-------------|-------------|
| C | -1.57008100 | -0.11805600 | -0.70069000 |
| H | -3.36102700 | 3.92276800  | 0.29747300  |
| H | -1.19136200 | 5.14904500  | 0.11816400  |
| C | -3.41360900 | -1.74760700 | -0.63563100 |
| C | -0.73399400 | -1.08133600 | -1.34076300 |
| C | -1.22327400 | -2.42769800 | -1.43626100 |
| C | -2.55422200 | -2.73413100 | -1.05630400 |
| H | -4.45241000 | -1.95287700 | -0.41134100 |
| H | -2.89802900 | -3.75787400 | -1.14575400 |
| C | -0.36674400 | -3.43194200 | -1.95411200 |
| C | 0.53250200  | -0.78632500 | -1.90196900 |
| C | 0.88761400  | -3.12112600 | -2.41500500 |
| C | 1.32726300  | -1.78006300 | -2.41762900 |
| H | -0.73249600 | -4.45152400 | -1.99604600 |
| H | 1.53316800  | -3.89828300 | -2.80625400 |
| H | 0.87522700  | 0.23654500  | -1.93869400 |
| H | 2.29939600  | -1.52565300 | -2.82169800 |
| C | -0.53250100 | -0.78627200 | 1.90202500  |
| H | -0.87518500 | 0.23661100  | 1.93876000  |
| C | 0.36662100  | -3.43193300 | 1.95406600  |
| H | 0.73231700  | -4.45153800 | 1.99594800  |
| C | -0.88771200 | -3.12107000 | 2.41499600  |
| C | -1.32729900 | -1.77998800 | 2.41767300  |
| H | -2.29941200 | -1.52555000 | 2.82177300  |
| H | -1.53328900 | -3.89820800 | 2.80624500  |
| O | -4.19463000 | 0.82301800  | 1.48971500  |
| O | -4.87558400 | 1.29069700  | -0.90069500 |
| O | 4.19466300  | 0.82282700  | -1.48967400 |
| O | 4.87562100  | 1.29069100  | 0.90069800  |

E(RB3LYP) = -2250.53152046  
 Zero-point correction= 0.377815 (Hartree/Particle)  
 Thermal correction to Energy= 0.458528  
 Thermal correction to Enthalpy= 0.460216  
 Thermal correction to Gibbs Free Energy= 0.242382  
 Sum of electronic and zero-point Energies  
 = -2250.153706  
 Sum of electronic and thermal Energies  
 = -2250.072993  
 Sum of electronic and thermal Enthalpies  
 = -2250.071304  
 Sum of electronic and thermal Free Energies  
 = -2250.289139 (unit: a.u.)

### 6SO<sub>2</sub>-TS

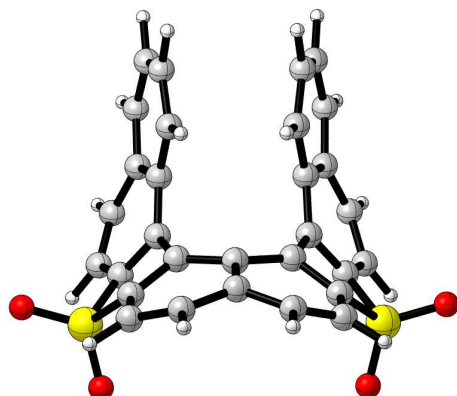

|   |             |             |             |
|---|-------------|-------------|-------------|
| C | -2.32444200 | -3.15558400 | 1.34155900  |
| C | -1.20371800 | -3.45735800 | 2.06875900  |
| C | -2.29636300 | -1.97937500 | 0.58985800  |
| C | -0.00019200 | -2.73803500 | 1.84132300  |
| C | -1.28286100 | -1.03264700 | 0.63297600  |
| C | -0.00010900 | -1.47279300 | 1.13319200  |
| S | -3.32028400 | -1.71959700 | -0.87873700 |

|   |             |             |             |
|---|-------------|-------------|-------------|
| C | -2.53818300 | -0.13138600 | -1.19982800 |
| C | -1.69878200 | 0.17563800  | -0.14243800 |
| H | -3.18750400 | -3.80828900 | 1.31787000  |
| H | -1.16300400 | -4.35845100 | 2.66839500  |
| C | -3.03500400 | 0.81865900  | -2.10402500 |
| C | -1.65580100 | 1.54192400  | 0.26090700  |
| C | -2.13349100 | 2.53581900  | -0.65712300 |
| C | -2.72922600 | 2.13906900  | -1.88352300 |
| H | -3.65328900 | 0.50995800  | -2.93703300 |
| H | -3.06322900 | 2.90289300  | -2.57586900 |
| C | 2.32400900  | -3.15588000 | 1.34158200  |
| C | 1.20324100  | -3.45751000 | 2.06877200  |
| C | 2.29608200  | -1.97967200 | 0.58987200  |
| C | 1.28270300  | -1.03281200 | 0.63298100  |
| S | 3.32003200  | -1.72005200 | -0.87872900 |
| C | 2.53814200  | -0.13174200 | -1.19983900 |
| C | 1.69878600  | 0.17541300  | -0.14244900 |
| H | 3.18698700  | -3.80869700 | 1.31789700  |
| H | 1.16240700  | -4.35859600 | 2.66841100  |
| C | 3.03510600  | 0.81822300  | -2.10404100 |
| C | 1.65601400  | 1.54170900  | 0.26088700  |
| C | 2.13384500  | 2.53552600  | -0.65715600 |
| C | 2.72952000  | 2.13867900  | -1.88355300 |
| H | 3.65334500  | 0.50942400  | -2.93704700 |
| H | 3.06363200  | 2.90244700  | -2.57590700 |
| C | 2.16516800  | 3.88876800  | -0.23955600 |
| C | 1.42344800  | 1.91955500  | 1.60309300  |
| C | 1.90572300  | 4.22481300  | 1.06652700  |
| C | 1.58677000  | 3.22187800  | 2.00410700  |
| H | 2.47464600  | 4.64532500  | -0.95155000 |
| H | 1.98392000  | 5.25633200  | 1.38831300  |
| H | 1.17160800  | 1.15230900  | 2.32302800  |
| H | 1.44767500  | 3.48614600  | 3.04530700  |
| C | -1.42315900 | 1.91972300  | 1.60311400  |
| H | -1.17142300 | 1.15243300  | 2.32303900  |
| C | -2.16460900 | 3.88906100  | -0.23951000 |
| H | -2.47398300 | 4.64567100  | -0.95149300 |
| C | -1.90509800 | 4.22505600  | 1.06657300  |
| C | -1.58628000 | 3.22206700  | 2.00414100  |
| H | -1.44712300 | 3.48630700  | 3.04534000  |
| H | -1.98313600 | 5.25658500  | 1.38836800  |
| O | 4.72585300  | -1.46209300 | -0.56717000 |
| O | 2.97806600  | -2.77457300 | -1.83161300 |
| O | -2.97846900 | -2.77415000 | -1.83164100 |
| O | -4.72606700 | -1.46145000 | -0.56716400 |

Imaginary frequency: -32.84 cm<sup>-1</sup>  
 E(RB3LYP) = -2250.45558332  
 Zero-point correction= 0.377024 (Hartree/Particle)  
 Thermal correction to Energy= 0.456176  
 Thermal correction to Enthalpy= 0.457864  
 Thermal correction to Gibbs Free Energy= 0.245068  
 Sum of electronic and zero-point Energies  
 = -2250.078559  
 Sum of electronic and thermal Energies  
 = -2249.999407  
 Sum of electronic and thermal Enthalpies  
 = -2249.997719  
 Sum of electronic and thermal Free Energies  
 = -2250.210515 (unit: a.u.)

## 6CF

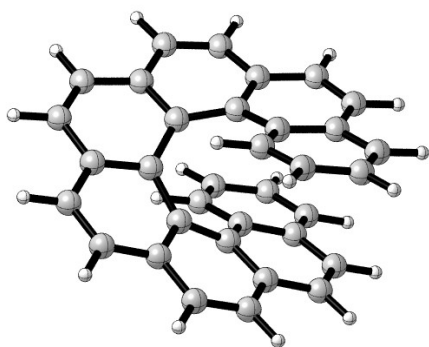

|   |             |             |             |
|---|-------------|-------------|-------------|
| C | -2.43411500 | -2.89930400 | -0.08399000 |
| C | -1.23193900 | -3.56791600 | -0.04933000 |
| C | -2.43054400 | -1.51053600 | 0.09120500  |
| C | -0.00001700 | -2.86386800 | 0.00019000  |
| C | -1.25218200 | -0.78538900 | 0.26288900  |
| C | -0.00001000 | -1.42082000 | 0.00011100  |
| C | -2.98642700 | 0.74656500  | 0.48348400  |
| C | -1.61943800 | 0.58428200  | 0.67933200  |
| H | -3.37144600 | -3.43256300 | -0.18923100 |
| H | -1.20419000 | -4.65117600 | -0.08412500 |
| C | -3.61088400 | 1.99330300  | 0.60730100  |
| C | -0.86530000 | 1.64519900  | 1.26086400  |
| C | -1.48648400 | 2.93471700  | 1.33026800  |
| C | -2.84974600 | 3.08335200  | 0.96471600  |
| H | -4.67057900 | 2.09267500  | 0.40305400  |
| H | -3.29677000 | 4.06948700  | 1.02280200  |
| C | 2.43407900  | -2.89931300 | 0.08437400  |
| C | 1.23189800  | -3.56791900 | 0.04979100  |
| C | 2.43052100  | -1.51056500 | -0.09098400 |
| C | 1.25216400  | -0.78542600 | -0.26274200 |
| C | 2.98642700  | 0.74648200  | -0.48353200 |
| C | 1.61943200  | 0.58419300  | -0.67934600 |
| H | 3.37140400  | -3.43257200 | 0.18967500  |
| H | 1.20414200  | -4.65117600 | 0.08471500  |
| C | 3.61089500  | 1.99319900  | -0.60749400 |
| C | 0.86530400  | 1.64505800  | -1.26099000 |
| C | 1.48649900  | 2.93456100  | -1.33053700 |
| C | 2.84976700  | 3.08321900  | -0.96501700 |
| H | 4.67059400  | 2.09258400  | -0.40327000 |
| H | 3.29680600  | 4.06934100  | -1.02321200 |
| C | 0.72442500  | 4.03313300  | -1.80320800 |
| C | -0.43318900 | 1.49264400  | -1.80306900 |
| C | -0.56116900 | 3.86208800  | -2.25355500 |
| C | -1.13352600 | 2.57258200  | -2.28276200 |
| H | 1.18639900  | 5.01421800  | -1.81906800 |
| H | -1.13157800 | 4.71171500  | -2.61025200 |
| H | -0.86588800 | 0.50457900  | -1.84196800 |
| H | -2.13316100 | 2.43516300  | -2.67723600 |
| C | 0.43318500  | 1.49283200  | 1.80297400  |
| H | 0.86588500  | 0.50477000  | 1.84197800  |
| C | -0.72440700 | 4.03333100  | 1.80283700  |
| H | -1.18637500 | 5.01442100  | 1.81858900  |
| C | 0.56117600  | 3.86232200  | 2.25322400  |
| C | 1.13352100  | 2.57281400  | 2.28257300  |
| H | 2.13314500  | 2.43542100  | 2.67708300  |
| H | 1.13158700  | 4.71198300  | 2.60983800  |
| C | 3.63634900  | -0.58378700 | -0.13444600 |
| C | -3.63636400 | -0.58373200 | 0.13454500  |
| C | 4.71466200  | -0.98998500 | -1.13478200 |
| C | 4.41986900  | -0.57291500 | 1.17696700  |
| C | 5.76502400  | -0.91014100 | 0.94859500  |
| C | 5.94685800  | -1.17340800 | -0.48511800 |

|   |             |             |             |
|---|-------------|-------------|-------------|
| C | 3.96630800  | -0.27898400 | 2.45255200  |
| C | 6.66810800  | -0.94745100 | 2.00911600  |
| C | 4.59317700  | -1.17328000 | -2.50203000 |
| C | 7.07396400  | -1.54780900 | -1.21372400 |
| C | -4.71472300 | -0.98981600 | 1.13486000  |
| C | -4.41981600 | -0.57302000 | -1.17692400 |
| C | -5.76497600 | -0.91024400 | -0.94858000 |
| C | -5.94688200 | -1.17334000 | 0.48515500  |
| C | -3.96619500 | -0.27924000 | -2.45252200 |
| C | -6.66800300 | -0.94771200 | -2.00914400 |
| C | -4.59331000 | -1.17294000 | 2.50213800  |
| C | -7.07402000 | -1.54767100 | 1.21374600  |
| H | -2.92658400 | -0.02988200 | -2.62627900 |
| C | -4.87290700 | -0.31807800 | -3.51382700 |
| H | -4.53436100 | -0.09227200 | -4.51821700 |
| H | -7.70789900 | -1.20542400 | -1.84344900 |
| C | -6.21166600 | -0.64819900 | -3.29186900 |
| H | -6.90216700 | -0.67355500 | -4.12689100 |
| H | -3.63890100 | -1.02481800 | 2.99422400  |
| C | -5.72418000 | -1.54865200 | 3.22988200  |
| H | -5.64970700 | -1.69695300 | 4.30080500  |
| H | -8.02984600 | -1.69282900 | 0.72323000  |
| C | -6.95197600 | -1.73375500 | 2.58992800  |
| H | -7.81937100 | -2.02505100 | 3.17092000  |
| H | 2.92670000  | -0.02962900 | 2.62633000  |
| C | 4.87307700  | -0.31766800 | 3.51381600  |
| H | 4.53457700  | -0.09174400 | 4.51819400  |
| H | 7.70800100  | -1.20516000 | 1.84339900  |
| C | 6.21183100  | -0.64778400 | 3.29182700  |
| H | 6.90237800  | -0.67301700 | 4.12681600  |
| H | 3.63873900  | -1.02523700 | -2.99408200 |
| C | 5.72401500  | -1.54906200 | -3.22978800 |
| H | 5.64948800  | -1.69749900 | -4.30068800 |
| H | 8.02981800  | -1.69289200 | -0.72324100 |
| C | 6.95184800  | -1.73406400 | -2.58987600 |
| H | 7.81921700  | -2.02541700 | -3.17088000 |

E(RB3LYP) = -2154.05465992

Zero-point correction= 0.693669 (Hartree/Particle)

Thermal correction to Energy= 0.817972

Thermal correction to Enthalpy= 0.819660

Thermal correction to Gibbs Free Energy= 0.513063

Sum of electronic and zero-point Energies

= -2153.360991

Sum of electronic and thermal Energies

= -2153.236688

Sum of electronic and thermal Enthalpies

= -2153.235000

Sum of electronic and thermal Free Energies

= -2153.541597 (unit: a.u.)

## 6CF-TS

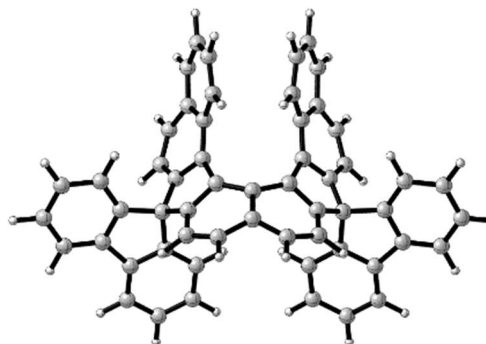

|   |             |             |            |
|---|-------------|-------------|------------|
| C | -0.02255900 | -0.94636400 | 2.75419900 |
| C | -0.01102000 | 0.04380000  | 1.69381600 |

|   |             |             |             |
|---|-------------|-------------|-------------|
| C | 2.29474200  | -1.53010600 | 2.40866600  |
| C | 1.17265400  | -1.57708700 | 3.19320300  |
| C | 2.28489700  | -0.66713700 | 1.31038200  |
| C | 1.28773700  | 0.29053100  | 1.09821900  |
| C | 2.77524900  | 0.46316600  | -0.69587100 |
| C | 1.80728600  | 1.16776400  | 0.01099000  |
| H | 3.14784600  | -2.17147000 | 2.59432900  |
| H | 1.11793900  | -2.25053900 | 4.04058700  |
| C | 3.36052100  | 0.96452600  | -1.86897900 |
| C | 1.77797800  | 2.58278100  | -0.17694400 |
| C | 2.37845900  | 3.11721500  | -1.36642100 |
| C | 3.07731000  | 2.25360200  | -2.25252100 |
| H | 4.04907200  | 0.34842300  | -2.43539300 |
| H | 3.50035200  | 2.66669700  | -3.16122500 |
| C | 2.42707100  | 4.52319200  | -1.53270500 |
| C | 1.47039100  | 3.47633400  | 0.87290600  |
| C | 2.07766100  | 5.36543300  | -0.50452600 |
| C | 1.65537700  | 4.83001800  | 0.72805200  |
| H | 2.82584400  | 4.92252000  | -2.45891800 |
| H | 2.16899900  | 6.43863200  | -0.62393600 |
| H | 1.14952800  | 3.06568800  | 1.82070800  |
| H | 1.45516100  | 5.49331800  | 1.56093100  |
| C | 3.22837500  | -0.73553000 | 0.11747200  |
| C | 3.13338700  | -2.09120900 | -0.57779400 |
| C | 4.71487300  | -0.66364300 | 0.45188600  |
| C | 5.37678300  | -1.82147800 | 0.00851900  |
| C | 4.39509800  | -2.70652900 | -0.63408100 |
| C | 5.40259400  | 3.35328600  | 1.09276100  |
| C | 6.74684100  | -1.96647600 | 0.21600500  |
| C | 2.01081200  | -2.71136600 | -1.09808400 |
| C | 4.53539300  | -3.95813300 | -1.23008900 |
| H | 4.88313800  | 1.24601600  | 1.42192400  |
| C | 6.77565600  | 0.20511600  | 1.29900600  |
| H | 7.33230400  | 0.98952600  | 1.79824600  |
| H | 7.26878400  | -2.85523500 | -0.12010400 |
| C | 7.43920300  | -0.94484500 | 0.86480200  |
| H | 8.50546800  | -1.04260200 | 1.03314900  |
| H | 1.04277600  | -2.22998100 | -1.03489200 |
| C | 2.15294900  | -3.96622400 | -1.69263500 |
| H | 1.28519100  | -4.46947800 | -2.10259400 |
| H | 5.50334300  | -4.44357500 | -1.28193100 |
| C | 3.40529600  | -4.58135300 | -1.75849700 |
| H | 3.49865600  | -5.55598500 | -2.22339500 |
| C | -2.34121500 | -1.50384300 | 2.38043300  |
| C | -1.22906100 | -1.56550900 | 3.17775300  |
| C | -2.31039900 | -0.63740000 | 1.28531000  |
| C | -1.30037900 | 0.30906000  | 1.08341500  |
| C | -2.79612200 | 0.52497500  | -0.70123800 |
| C | -1.80449900 | 1.20197400  | 0.00030300  |
| H | -3.20498400 | -2.13355100 | 2.55629400  |
| H | -1.19195800 | -2.24049200 | 4.02486100  |
| C | -3.37638000 | 1.04045700  | -1.87038700 |
| C | -1.72762200 | 2.61400100  | -0.19813300 |
| C | -2.32194300 | 3.16220600  | -1.38497300 |
| C | -3.05900200 | 2.31946900  | -2.25960700 |
| H | -4.08504900 | 0.44179500  | -2.43062300 |
| H | -3.47746900 | 2.74308200  | -3.16558300 |
| C | -2.31928800 | 4.56743400  | -1.56285300 |
| C | -1.36763800 | 3.50385100  | 0.83718900  |
| C | -1.91986900 | 5.40406500  | -0.54855100 |
| C | -1.49802200 | 4.86271000  | 0.68125600  |
| H | -2.71596900 | 4.97388500  | -2.48686100 |
| H | -1.96947400 | 6.47900600  | -0.67650600 |
| H | -1.04828100 | 3.08933900  | 1.78353900  |
| H | -1.25440500 | 5.52481300  | 1.50324900  |
| C | -3.25933600 | -0.67770900 | 0.09536700  |
| C | -3.17674100 | -2.01994400 | -0.62743300 |
| C | -4.73994500 | -0.61125200 | 0.45454900  |
| C | -5.40388700 | -1.77382900 | 0.02644800  |

|   |             |             |             |
|---|-------------|-------------|-------------|
| C | -4.43380200 | -2.64656900 | -0.64980900 |
| C | -5.41920700 | 0.39888300  | 1.11486400  |
| C | -6.76696000 | -1.93017800 | 0.26877700  |
| C | -2.07150100 | -2.61093500 | -1.21439400 |
| C | -4.58352800 | -3.88880100 | -1.26301300 |
| H | -4.89827900 | 1.29438200  | 1.43397600  |
| C | -6.78569400 | 0.24014300  | 1.35440000  |
| H | -7.33589900 | 1.01992000  | 1.86784400  |
| H | -7.29020200 | -2.82260200 | -0.05538400 |
| C | -7.45083900 | -0.91470400 | 0.93595400  |
| H | -8.51174300 | -1.02100200 | 1.13087000  |
| H | -1.11174900 | -2.10911900 | -1.19914200 |
| C | -2.22389500 | -3.85453700 | -1.82981700 |
| H | -1.37132300 | -4.33178100 | -2.29858600 |
| H | -5.54795100 | -4.38326600 | -1.28858600 |
| C | -3.46910100 | -4.48720000 | -1.85011200 |
| H | -3.57048300 | -5.45299900 | -2.33144800 |

Imaginary frequency: -33.04 cm<sup>-1</sup>  
E(RB3LYP) = -2153.97745482  
Zero-point correction= 0.691850 (Hartree/Particle)  
Thermal correction to Energy= 815110  
Thermal correction to Enthalpy= 0.816798  
Thermal correction to Gibbs Free Energy= 0.509876  
Sum of electronic and zero-point Energies=  
-2153.285605  
Sum of electronic and thermal Energies=  
-2153.162345  
Sum of electronic and thermal Enthalpies=  
-2153.160657  
Sum of electronic and thermal Free Energies=  
-2153.467578

## 6CX

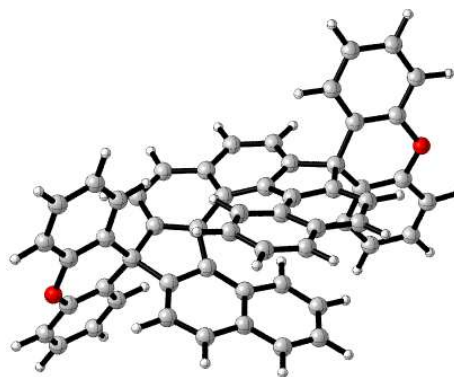

|   |             |             |             |
|---|-------------|-------------|-------------|
| C | -2.43181700 | -2.98886700 | -0.12834800 |
| C | -1.23155900 | -3.66018400 | -0.07220700 |
| C | -2.43206000 | -1.60041900 | 0.05091800  |
| C | 0.00002500  | -2.95708900 | 0.00033300  |
| C | -1.25591200 | -0.87790800 | 0.24348000  |
| C | 0.00001100  | -1.51442000 | 0.00021300  |
| C | -2.98492500 | 0.66188800  | 0.42877000  |
| C | -1.62431600 | 0.49318400  | 0.65212900  |
| H | -3.36721100 | -3.52111000 | -0.25324400 |
| H | -1.20480900 | -4.74339200 | -0.10796100 |
| C | -3.60644600 | 1.91127300  | 0.53978100  |
| C | -0.87595100 | 1.54969000  | 1.24867600  |
| C | -1.49156700 | 2.84227200  | 1.30531000  |
| C | -2.84654900 | 2.99714400  | 0.91247900  |
| H | -4.66108900 | 2.01968600  | 0.31537400  |
| H | -3.28998800 | 3.98538700  | 0.96119900  |
| C | 2.43187100  | -2.98880200 | 0.12897600  |
| C | 1.23162400  | -3.66014900 | 0.07297800  |

|   |             |             |             |
|---|-------------|-------------|-------------|
| C | 2.43208500  | -1.60038500 | -0.05053000 |
| C | 1.25591800  | -0.87792700 | -0.24318000 |
| C | 2.98489000  | 0.66187300  | -0.42875300 |
| C | 1.62428300  | 0.49310300  | -0.65206600 |
| H | 3.36728000  | -3.52100800 | 0.25392500  |
| H | 1.20489400  | -4.74335200 | 0.10890600  |
| C | 3.60637800  | 1.91125600  | -0.53996500 |
| C | 0.87588000  | 1.54949600  | -1.24876500 |
| C | 1.49146200  | 2.84208600  | -1.30559900 |
| C | 2.84644600  | 2.99705200  | -0.91281000 |
| H | 4.66102600  | 2.01972500  | -0.31560800 |
| H | 3.28986100  | 3.98529800  | -0.96169300 |
| C | 0.73333700  | 3.93617000  | -1.79466800 |
| C | -0.40921400 | 1.39025400  | -1.81836800 |
| C | -0.54126400 | 3.75747900  | -2.27337400 |
| C | -1.10567600 | 2.46474000  | -2.31513500 |
| H | 1.19015000  | 4.91976100  | -1.80147200 |
| H | -1.10787800 | 4.60390800  | -2.64352400 |
| H | -0.83894800 | 0.40258100  | -1.86844200 |
| H | -2.09358600 | 2.31544100  | -2.73403000 |
| C | 0.40913900  | 1.39056600  | 1.81831600  |
| H | 0.83889500  | 0.40291100  | 1.86853100  |
| C | -0.73347600 | 3.93644800  | 1.79422400  |
| H | -1.19031200 | 4.92002900  | 1.80087400  |
| C | 0.54112400  | 3.75786100  | 2.27297200  |
| C | 1.10556900  | 2.46514300  | 2.31493100  |
| H | 2.09347900  | 2.31593200  | 2.73385800  |
| H | 1.10771300  | 4.60436000  | 2.64300100  |
| C | 3.63930100  | -0.67344600 | -0.06194200 |
| C | -3.63928000 | -0.67349200 | 0.06207300  |
| C | 4.67526600  | -1.03392400 | -1.11766500 |
| C | 4.30172500  | -0.58924400 | 1.30896000  |
| C | 5.66732000  | -0.32303200 | 1.40236600  |
| C | 6.02309500  | -0.76103000 | -0.89308800 |
| O | 6.47921700  | -0.23844900 | 0.29565700  |
| C | 3.56856700  | -0.67206700 | 2.49629000  |
| C | 6.28635300  | -0.11747800 | 2.63451400  |
| C | 4.30783500  | -1.55944900 | -2.35893400 |
| C | 6.98612200  | -0.99591000 | -1.87279800 |
| C | -4.67536700 | -1.03383400 | 1.11772200  |
| C | -4.30154600 | -0.58946600 | -1.30891600 |
| C | -5.66711700 | -0.32318500 | -1.40249800 |
| C | -6.02315700 | -0.76088700 | 0.89297100  |
| O | -6.47911100 | -0.23838200 | -0.29587400 |
| C | -3.56826600 | -0.67247700 | -2.49615700 |
| C | -6.28601200 | -0.11776100 | -2.63473500 |
| C | -4.30810300 | -1.55928400 | 2.35907200  |
| C | -6.98630500 | -0.99562500 | 1.87259300  |
| H | -2.51212300 | -0.90146300 | -2.44176400 |
| C | -4.16920300 | -0.46824200 | -3.73150800 |
| H | -3.57772700 | -0.53191000 | -4.63657800 |
| H | -7.34958200 | 0.08424300  | -2.65171400 |
| C | -5.53371400 | -0.18272400 | -3.79864500 |
| H | -6.01277100 | -0.02224500 | -4.75708600 |
| H | -3.26193000 | -1.77023600 | 2.54466000  |
| C | -5.25500800 | -1.79820000 | 3.34622100  |
| H | -4.94856000 | -2.20223600 | 4.30328800  |
| H | -8.02114300 | -0.77128300 | 1.64676200  |
| C | -6.59883400 | -1.51106300 | 3.10123700  |
| H | -7.34503800 | -1.69433600 | 3.86513700  |
| H | 2.51241100  | -0.90102100 | 2.44203800  |
| C | 4.16963900  | -0.46769900 | 3.73155100  |
| H | 3.57825300  | -0.53122200 | 4.63669100  |
| H | 7.34993700  | 0.08446400  | 2.65135600  |
| C | 5.53417300  | -0.18224200 | 3.79851000  |
| H | 6.01333800  | -0.02166600 | 4.75688000  |
| H | 3.26162800  | -1.77035100 | -2.54438900 |
| C | 5.25461400  | -1.79850500 | -3.34616800 |
| H | 4.94803500  | -2.20259900 | -4.30316800 |
| H | 8.02099700  | -0.77160900 | -1.64710000 |

|   |            |             |             |
|---|------------|-------------|-------------|
| C | 6.59848500 | -1.51143100 | -3.10135400 |
| H | 7.34459500 | -1.69481600 | -3.86531900 |

E(RB3LYP) = -2304.52694748  
 Zero-point correction= 0.702831 (Hartree/Particle)  
 Thermal correction to Energy= 0.831671  
 Thermal correction to Enthalpy= 0.833360  
 Thermal correction to Gibbs Free Energy= 0.516402  
 Sum of electronic and zero-point Energies  
 = -2303.824116  
 Sum of electronic and thermal Energies  
 = -2303.695276  
 Sum of electronic and thermal Enthalpies  
 = -2303.693588  
 Sum of electronic and thermal Free Energies  
 = -2304.010545 (unit: a.u.)

carbo[8]helicene

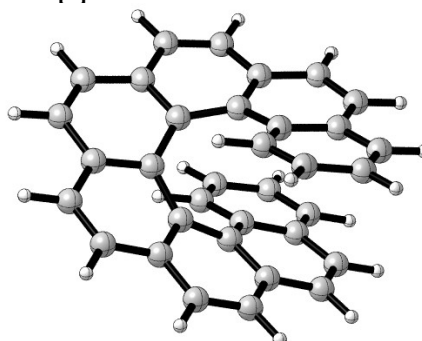

|   |             |             |             |
|---|-------------|-------------|-------------|
| C | -3.39550500 | 2.38058600  | 0.44250000  |
| C | -4.08007300 | 1.22033400  | 0.23620100  |
| C | -1.98192600 | 2.36662400  | 0.62843800  |
| C | -3.38018000 | 0.00100200  | 0.00013600  |
| C | -1.28503500 | 1.13184900  | 0.59370600  |
| C | -1.96333200 | 0.00062700  | -0.00016500 |
| C | -1.25596900 | 3.57494700  | 0.82664200  |
| C | 0.09894700  | 3.55021600  | 0.97419500  |
| C | 0.78687000  | 2.31488900  | 1.13836600  |
| C | 0.06506500  | 1.10094300  | 1.09979900  |
| H | -3.91814300 | 3.32755600  | 0.51920300  |
| H | -5.16342200 | 1.21372000  | 0.19178700  |
| H | -1.79666100 | 4.51465600  | 0.80648600  |
| H | 0.66753500  | 4.47155200  | 1.03208800  |
| C | 2.19914800  | 2.29287700  | 1.35207100  |
| C | 0.71532400  | -0.09093100 | 1.60403500  |
| C | 2.12846000  | -0.08787300 | 1.77507800  |
| C | 2.85513200  | 1.12688900  | 1.58875800  |
| H | 2.73968400  | 3.23112500  | 1.29763900  |
| H | 3.93313700  | 1.11058900  | 1.70446400  |
| C | -3.39692300 | -2.37866200 | -0.44166600 |
| C | -4.08082000 | -1.21799000 | -0.23551100 |
| C | -1.98338800 | -2.36551700 | -0.62801800 |
| C | -1.28583700 | -1.13109700 | -0.59401500 |
| C | -1.25814500 | -3.57429900 | -0.82603200 |
| C | 0.09671900  | -3.55036800 | -0.97424300 |
| C | 0.78523700  | -2.31546500 | -1.13906200 |
| C | 0.06411300  | -1.10112200 | -1.10046400 |
| H | -3.92007700 | -3.32538300 | -0.51792200 |
| H | -5.16414800 | -1.21080300 | -0.19070800 |
| H | -1.79934300 | -4.51370600 | -0.80531400 |
| H | 0.66476400  | -4.47203700 | -1.03214700 |
| C | 2.19748500  | -2.29426300 | -1.35317000 |
| C | 0.71499200  | 0.09036900  | -1.60471500 |
| C | 2.12820200  | 0.08674200  | -1.77507700 |
| C | 2.85414600  | -1.12854900 | -1.58932100 |
| H | 2.73745700  | -3.23286100 | -1.29917100 |
| H | 3.93216300  | -1.11281600 | -1.70499000 |

|   |             |             |             |
|---|-------------|-------------|-------------|
| C | 2.78171000  | 1.26811400  | -2.19376400 |
| C | 0.00412400  | 1.24113700  | -2.01980700 |
| C | 2.06619500  | 2.39886000  | -2.51025400 |
| C | 0.66008200  | 2.36892800  | -2.45567100 |
| H | 3.86248900  | 1.25721500  | -2.28399900 |
| H | 2.57792600  | 3.29788400  | -2.83357100 |
| H | 0.08802000  | 3.23695400  | -2.76077500 |
| H | -1.07533600 | 1.22982400  | -2.00247600 |
| C | 2.78125200  | -1.26924900 | 2.19488300  |
| C | 0.00381700  | -1.24149800 | 2.01870900  |
| C | 2.06514500  | -2.39957400 | 2.51147200  |
| C | 0.65909100  | -2.36932400 | 2.45548800  |
| H | 3.86197400  | -1.25869700 | 2.28585400  |
| H | 2.57634100  | -3.29855700 | 2.83575000  |
| H | 0.08653000  | -3.23712400 | 2.76031100  |
| H | -1.07561800 | -1.23000200 | 2.00034500  |

E(RB3LYP) = -1308.17349560  
 Zero-point correction= 0.426811 (Hartree/Particle)  
 Thermal correction to Energy= 0.501228  
 Thermal correction to Enthalpy= 0.502916  
 Thermal correction to Gibbs Free Energy= 0.305336  
 Sum of electronic and zero-point Energies  
 = -1307.746684  
 Sum of electronic and thermal Energies  
 = -1307.672268  
 Sum of electronic and thermal Enthalpies  
 = -1307.670580  
 Sum of electronic and thermal Free Energies  
 = -1307.868160 (unit: a.u.)

#### carbo[8]helicene-TS1

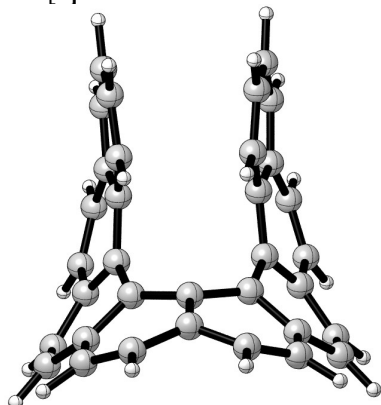

|   |             |             |             |
|---|-------------|-------------|-------------|
| C | 0.84383400  | 3.55855100  | -2.28336300 |
| C | 1.63780600  | 3.81444900  | -1.20970500 |
| C | -0.02539000 | 2.43257900  | -2.27405500 |
| C | 1.41590600  | 3.09275500  | 0.00000000  |
| C | 0.13936000  | 1.42882900  | -1.28224500 |
| C | 0.69644300  | 1.86078500  | 0.00000000  |
| C | -1.11981500 | 2.35158100  | -3.18587400 |
| C | -2.00947400 | 1.32060800  | -3.10810800 |
| C | -1.65438900 | 0.15581600  | -2.36942700 |
| C | -0.45537700 | 0.15231400  | -1.62007400 |
| H | 0.82314600  | 4.22689400  | -3.13684600 |
| H | 2.28086800  | 4.68667500  | -1.18651500 |
| H | -1.27428900 | 3.17397000  | -3.87515900 |
| H | -2.91393600 | 1.31157300  | -3.70548400 |
| C | -2.38574100 | -1.06450700 | -2.51970300 |
| C | 0.24515600  | -1.10523400 | -1.53498100 |
| C | -0.45185000 | -2.31808100 | -1.80921900 |
| C | -1.82959200 | -2.25870400 | -2.18075800 |
| H | -3.37545000 | -1.01878700 | -2.96081500 |
| H | -2.37849100 | -3.18451600 | -2.31231000 |

|   |             |             |             |
|---|-------------|-------------|-------------|
| C | 0.84383400  | 3.55855100  | 2.28336300  |
| C | 1.63780600  | 3.81444900  | 1.20970500  |
| C | -0.02539000 | 2.43257900  | 2.27405500  |
| C | 0.13936000  | 1.42882900  | 1.28224500  |
| C | -1.11981500 | 2.35158100  | 3.18587400  |
| C | -2.00947400 | 1.32060800  | 3.10810800  |
| C | -1.65438900 | 0.15581600  | 2.36942700  |
| C | -0.45537700 | 0.15231400  | 1.62007400  |
| H | 0.82314600  | 4.22689400  | 3.13684600  |
| H | 2.28086800  | 4.68667500  | 1.18651500  |
| H | -1.27428900 | 3.17397000  | 3.87515900  |
| H | -2.91393600 | 1.31157300  | 3.70548400  |
| C | -2.38574100 | -1.06450700 | 2.51970300  |
| C | 0.24515600  | -1.10523400 | 1.53498100  |
| C | -0.45185000 | -2.31808100 | 1.80921900  |
| C | -1.82959200 | -2.25870400 | 2.18075800  |
| H | -3.37545000 | -1.01878700 | 2.96081500  |
| H | -2.37849100 | -3.18451600 | 2.31231000  |
| C | 0.26562300  | -3.53169400 | 1.86067600  |
| C | 1.65423000  | -1.14993300 | 1.45396200  |
| C | 1.63901800  | -3.54399800 | 1.76525100  |
| C | 2.33691900  | -2.33644800 | 1.59561500  |
| H | -0.28130600 | -4.45185400 | 2.03581700  |
| H | 2.18311300  | -4.47779700 | 1.84444100  |
| H | 2.19743000  | -0.22314800 | 1.32209500  |
| H | 3.41995700  | -2.34039600 | 1.55880100  |
| C | 1.65423000  | -1.14993300 | -1.45396200 |
| H | 2.19743000  | -0.22314800 | -1.32209500 |
| C | 0.26562300  | -3.53169400 | -1.86067600 |
| H | -0.28130600 | -4.45185400 | -2.03581700 |
| C | 1.63901800  | -3.54399800 | -1.76525100 |
| C | 2.33691900  | -2.33644800 | -1.59561500 |
| H | 3.41995700  | -2.34039600 | -1.55880100 |
| H | 2.18311300  | -4.47779700 | -1.84444100 |

Imaginary frequency: -37.79 cm<sup>-1</sup>  
 E(RB3LYP) = -1308.10062050  
 Zero-point correction= 0.424988 (Hartree/Particle)  
 Thermal correction to Energy= 0.498315  
 Thermal correction to Enthalpy= 0.500004  
 Thermal correction to Gibbs Free Energy= 0.305543  
 Sum of electronic and zero-point Energies=  
 -1307.675632  
 Sum of electronic and thermal Energies  
 = -1307.602305  
 Sum of electronic and thermal Enthalpies  
 = -1307.600617  
 Sum of electronic and thermal Free Energies  
 = -1307.795078 (unit: a.u.)

#### carbo[8]helicene-INT

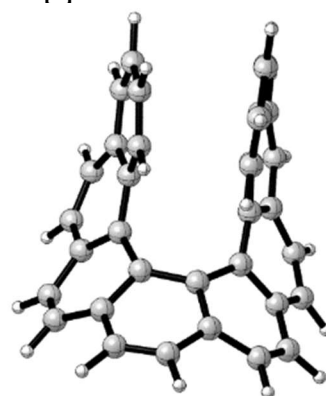

|   |            |            |             |
|---|------------|------------|-------------|
| C | 3.91110600 | 0.80451300 | -1.70719400 |
|---|------------|------------|-------------|

|   |             |             |             |
|---|-------------|-------------|-------------|
| C | 3.87147800  | -0.54880100 | -1.82952600 |
| C | 2.95446400  | 1.46844300  | -0.89081700 |
| C | 2.92944800  | -1.28649800 | -1.05814100 |
| C | 1.74504500  | 0.80977500  | -0.53009200 |
| C | 1.76767200  | -0.65335000 | -0.52964900 |
| C | 3.31437500  | 2.70260600  | -0.26998300 |
| C | 2.56435000  | 3.19497200  | 0.75522600  |
| C | 1.24718400  | 2.69244400  | 0.96213600  |
| C | 0.76300500  | 1.66168100  | 0.12510500  |
| H | 4.73260700  | 1.37830000  | -2.12125400 |
| H | 4.65796600  | -1.08473200 | -2.34859000 |
| H | 4.26304800  | 3.15387700  | -0.53709800 |
| H | 2.90698900  | 4.03313900  | 1.35123700  |
| C | 0.35700400  | 3.30358900  | 1.89989400  |
| C | -0.64928300 | 1.69342000  | -0.15425400 |
| C | -1.53260500 | 2.35679600  | 0.74649300  |
| C | -0.98227100 | 3.06209100  | 1.85871200  |
| H | 0.77506300  | 3.98697300  | 2.63097800  |
| H | -1.65292700 | 3.51903000  | 2.57777300  |
| C | 2.81683400  | -3.05300800 | 0.57314500  |
| C | 3.34749600  | -2.56600000 | -0.58064700 |
| C | 1.64131900  | -2.46240800 | 1.12000200  |
| C | 0.95748900  | -1.46756000 | 0.37495100  |
| C | 1.12752400  | -2.85848100 | 2.38906900  |
| C | -0.04879900 | -2.34495200 | 2.85339000  |
| C | -0.91115900 | -1.66208500 | 1.95042000  |
| C | -0.45241700 | -1.36652200 | 0.64448400  |
| H | 3.25682100  | -3.90504900 | 1.07882200  |
| H | 4.21327500  | -3.03126700 | -1.03755200 |
| H | 1.71610900  | -3.54111500 | 2.99167400  |
| H | -0.40259700 | -2.56909900 | 3.85322300  |
| C | -2.28020100 | -1.42335800 | 2.28092900  |
| C | -1.44091600 | -1.31140700 | -0.40810700 |
| C | -2.81908700 | -1.20957300 | -0.06410500 |
| C | -3.19443900 | -1.14948600 | 1.31201100  |
| H | -2.58342100 | -1.51804100 | 3.31783900  |
| H | -4.23685900 | -0.98776000 | 1.56186900  |
| C | -3.79243600 | -1.26564100 | -1.08409000 |
| C | -1.10712600 | -1.55853400 | -1.76006100 |
| C | -3.43635400 | -1.49621200 | -2.39437700 |
| C | -2.08104700 | -1.66356600 | -2.72848700 |
| H | -4.83648300 | -1.16097500 | -0.80976400 |
| H | -4.19773500 | -1.56676400 | -3.16253500 |
| H | -0.06798600 | -1.69693700 | -2.02671900 |
| H | -1.79946800 | -1.88016100 | -3.75250100 |
| C | -1.13837400 | 1.35178800  | -1.43545000 |
| H | -0.44314600 | 0.96345000  | -2.16612100 |
| C | -2.90123900 | 2.46987500  | 0.41331000  |
| H | -3.57341100 | 2.93429500  | 1.12671800  |
| C | -3.35353700 | 2.09578700  | -0.83147600 |
| C | -2.45102200 | 1.57931200  | -1.77847700 |
| H | -2.79347800 | 1.34261100  | -2.77694300 |
| H | -4.39526300 | 2.23232000  | -1.09711000 |

E(RB3LYP) = -1308.10838284  
 Zero-point correction= 0.425601 (Hartree/Particle)  
 Thermal correction to Energy= 0.500284  
 Thermal correction to Enthalpy= 0.501972  
 Thermal correction to Gibbs Free Energy= 0.303129  
 Sum of electronic and zero-point Energies  
 = -1307.682782  
 Sum of electronic and thermal Energies  
 = -1307.608099  
 Sum of electronic and thermal Enthalpies  
 = -1307.606411  
 Sum of electronic and thermal Free Energies  
 = -1307.805254 (unit: a.u.)

carbo[8]helicene-TS2

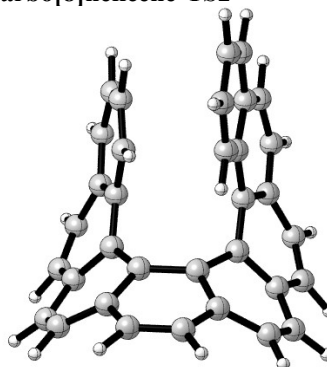

|   |             |             |             |
|---|-------------|-------------|-------------|
| C | 3.82113200  | -0.53062300 | -1.85064500 |
| C | 3.50157800  | -1.81266000 | -1.53389200 |
| C | 3.13313500  | 0.53726800  | -1.21244700 |
| C | 2.48233500  | -2.05999200 | -0.57426100 |
| C | 1.85744900  | 0.32267100  | -0.60986400 |
| C | 1.51086100  | -1.06142700 | -0.27524100 |
| C | 3.86465500  | 1.73818100  | -0.96999400 |
| C | 3.43751000  | 2.60822400  | -0.01513700 |
| C | 2.10502500  | 2.51085700  | 0.47667000  |
| C | 1.24099300  | 1.52049600  | -0.04532200 |
| H | 4.69428300  | -0.30500200 | -2.45225900 |
| H | 4.11330200  | -2.64106200 | -1.87280200 |
| H | 4.83494600  | 1.85270100  | -1.43919200 |
| H | 4.06295200  | 3.42701800  | 0.32185500  |
| C | 1.59491600  | 3.46854600  | 1.40958500  |
| C | -0.15617000 | 1.88112300  | -0.07786900 |
| C | -0.65786900 | 2.85996700  | 0.83197600  |
| C | 0.26222100  | 3.56407100  | 1.66549000  |
| H | 2.30360500  | 4.12528400  | 1.90216900  |
| H | -0.11809700 | 4.27395600  | 2.39144500  |
| C | 1.98048600  | -3.26095100 | 1.45205400  |
| C | 2.62678100  | -3.21286700 | 0.25762100  |
| C | 0.89545100  | -2.36990500 | 1.70195200  |
| C | 0.47901500  | -1.47692300 | 0.67826700  |
| C | 0.16359100  | -2.42799900 | 2.92005300  |
| C | -1.00804600 | -1.74261800 | 3.05734400  |
| C | -1.62918200 | -1.19621600 | 1.90252000  |
| C | -0.92701200 | -1.16902000 | 0.67028400  |
| H | 2.21970300  | -4.01301900 | 2.19506000  |
| H | 3.38385100  | -3.94368500 | -0.00190300 |
| H | 0.56230800  | -3.02426600 | 3.73309800  |
| H | -1.54518600 | -1.73335100 | 3.99882200  |
| C | -3.00663300 | -0.82237500 | 1.94489300  |
| C | -1.71295600 | -1.14144100 | -0.54650800 |
| C | -3.11330500 | -0.88510500 | -0.46670600 |
| C | -3.71764400 | -0.64338800 | 0.80222700  |
| H | -3.48465000 | -0.73653900 | 2.91448100  |
| H | -4.76860900 | -0.37952100 | 0.83693900  |
| C | -3.89286200 | -0.89632500 | -1.64331800 |
| C | -1.17861800 | -1.48260500 | -1.81054400 |
| C | -3.33313900 | -1.18955000 | -2.86606700 |
| C | -1.96420500 | -1.50330400 | -2.94216500 |
| H | -4.95250400 | -0.67885900 | -1.56250800 |
| H | -3.94488500 | -1.20200800 | -3.76059400 |
| H | -0.13081500 | -1.73372500 | -1.89082700 |
| H | -1.52400200 | -1.77410400 | -3.89485000 |
| C | -0.96296100 | 1.53399800  | -1.18008600 |
| H | -0.53651500 | 0.92345700  | -1.96075900 |
| C | -2.01033300 | 3.25490700  | 0.74330200  |
| H | -2.39523000 | 3.95997100  | 1.47219900  |
| C | -2.79609600 | 2.83900500  | -0.30919300 |
| C | -2.24462600 | 2.02177400  | -1.31020900 |
| H | -2.82763400 | 1.76309100  | -2.18407700 |
| H | -3.81967100 | 3.18490300  | -0.39490800 |

Imaginary frequency:  $-24.71 \text{ cm}^{-1}$   
 E(RB3LYP) =  $-1308.10669621$   
 Zero-point correction=  $0.425558$  (Hartree/Particle)  
 Thermal correction to Energy=  $0.498724$   
 Thermal correction to Enthalpy=  $0.500413$   
 Thermal correction to Gibbs Free Energy=  $0.306635$   
 Sum of electronic and zero-point Energies  
 =  $1307.681138$   
 Sum of electronic and thermal Energies  
 =  $-1307.607972$   
 Sum of electronic and thermal Enthalpies  
 =  $-1307.606284$   
 Sum of electronic and thermal Free Energies  
 =  $-1307.800061$  (unit: a.u.)

• Cyclization of ( $R_a, R_a$ )-5 into ( $M$ )-6O

( $R_a, R_a$ )-5'

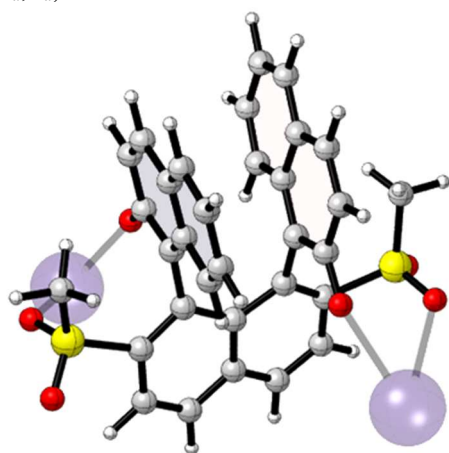

|   |             |             |             |
|---|-------------|-------------|-------------|
| C | 0.72887000  | 4.33363300  | -2.27126600 |
| H | 1.01688900  | 5.37394200  | -2.12735300 |
| C | -0.07989000 | 3.97195400  | -3.33464800 |
| H | -0.44057700 | 4.72049300  | -4.03566300 |
| C | -0.43310400 | 2.60973800  | -3.49972300 |
| H | -1.07253600 | 2.31687300  | -4.32994300 |
| C | 0.00530100  | 1.65141100  | -2.60757700 |
| H | -0.30316600 | 0.61922400  | -2.73518200 |
| C | 0.84093500  | 1.98880100  | -1.50256200 |
| C | 1.21248400  | 3.36903300  | -1.35384400 |
| C | 2.09272800  | 3.71923700  | -0.28655800 |
| H | 2.36981700  | 4.76568800  | -0.16454700 |
| C | 2.59242800  | 2.76829700  | 0.56284100  |
| H | 3.26764400  | 3.04636000  | 1.36987000  |
| C | 2.24871700  | 1.36203700  | 0.45367800  |
| C | 1.34388500  | 1.02155700  | -0.59457300 |
| C | 1.04355900  | -0.43057800 | -0.74937800 |
| C | 1.88202800  | -1.20857400 | -1.54242900 |
| C | 1.78745600  | -2.62220200 | -1.63142100 |
| H | 2.45230400  | -3.17375600 | -2.28671400 |
| C | 0.88324100  | -3.27694000 | -0.84075600 |
| H | 0.82737200  | -4.36216400 | -0.84755600 |
| C | 0.00014600  | -2.55077500 | 0.00000500  |
| C | -0.00010400 | -1.11158400 | -0.00005300 |
| C | -1.04392600 | -0.43087500 | 0.74927600  |
| C | -1.88213900 | -1.20910300 | 1.54241300  |
| C | -1.78705100 | -2.62267000 | 1.63153300  |
| H | -2.45164400 | -3.17439200 | 2.28694000  |
| C | -0.88264800 | -3.27716700 | 0.84086500  |

|    |             |             |             |
|----|-------------|-------------|-------------|
| H  | -0.82638800 | -4.36237000 | 0.84779000  |
| C  | -1.34438500 | 1.02125600  | 0.59473700  |
| C  | -2.24903300 | 1.36210300  | -0.45354000 |
| C  | -2.59280000 | 2.76839100  | -0.56220700 |
| H  | -3.26797000 | 3.04671300  | -1.36918400 |
| C  | -2.09316600 | 3.71905200  | 0.28753900  |
| H  | -2.37027100 | 4.76553900  | 0.16587200  |
| C  | -1.21295200 | 3.36850800  | 1.35474100  |
| C  | -0.84144400 | 1.98822300  | 1.50305000  |
| C  | -0.00577800 | 1.65050100  | 2.60793900  |
| H  | 0.30267400  | 0.61827400  | 2.73525700  |
| C  | 0.43270800  | 2.60856800  | 3.50033100  |
| H  | 1.07218400  | 2.31544800  | 4.33042800  |
| C  | 0.07951200  | 3.97083500  | 3.33566600  |
| H  | 0.44025900  | 4.71916900  | 4.03687000  |
| C  | -0.72928900 | 4.33283300  | 2.27242300  |
| H  | -1.01728800 | 5.37318900  | 2.12881600  |
| O  | 2.75978600  | 0.49687900  | 1.25417600  |
| O  | -2.75991600 | 0.49725000  | -1.25449500 |
| S  | -3.40692200 | -0.64873800 | 2.38214700  |
| C  | -3.40776200 | 1.07470600  | 2.88294000  |
| H  | -2.51354600 | 1.29042500  | 3.46681900  |
| H  | -3.49598400 | 1.72534900  | 2.01629900  |
| H  | -4.29949900 | 1.14345900  | 3.51513200  |
| O  | -4.52831100 | -0.83431400 | 1.42213100  |
| O  | -3.47379900 | -1.43583200 | 3.64205800  |
| Cs | -4.44509200 | -1.88918400 | -1.62082400 |
| S  | 3.40659300  | -0.64780800 | -2.38228500 |
| O  | 4.52822400  | -0.83343900 | -1.42258100 |
| O  | 3.47329600  | -1.43463300 | -3.64236700 |
| C  | 3.40718300  | 1.07574600  | -2.88270500 |
| H  | 2.51290200  | 1.29148000  | -3.46647400 |
| H  | 3.49539200  | 1.72623300  | -2.01594400 |
| H  | 4.29885600  | 1.14471600  | -3.51496300 |
| Cs | 4.44580700  | -1.88914700 | 1.62016700  |

E(RB3LYP) =  $-2521.044395$   
 Zero-point correction=  $0.462143$  (Hartree/Particle)  
 Thermal correction to Energy=  $0.527039$   
 Thermal correction to Enthalpy=  $0.528316$   
 Thermal correction to Gibbs Free Energy=  $0.346211$   
 Sum of electronic and zero-point Energies  
 =  $-2520.582252$   
 Sum of electronic and thermal Energies  
 =  $-2520.517356$   
 Sum of electronic and thermal Enthalpies  
 =  $-2520.516079$   
 Sum of electronic and thermal Free Energies  
 =  $-2520.698184$   
 E(RB3LYP/Single point) =  $-2521.669067$   
 G =  $-2521.322856$  (unit: a.u.)



TS5<sup>+</sup>→INT1

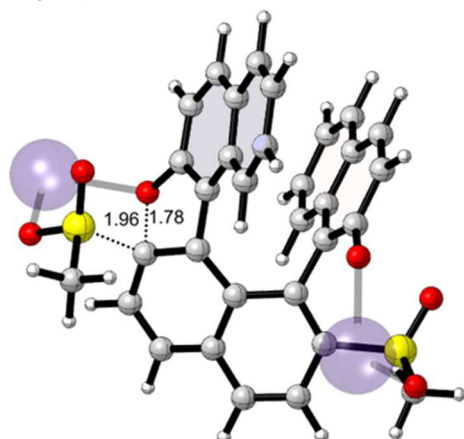

|   |             |             |             |
|---|-------------|-------------|-------------|
| C | 0.17959100  | 4.10763200  | 2.06781400  |
| H | 0.13536900  | 5.18167700  | 1.89243300  |
| C | 1.09061600  | 3.58368200  | 2.96924700  |
| H | 1.77459600  | 4.23410800  | 3.50875800  |
| C | 1.11040000  | 2.18414200  | 3.18747800  |
| H | 1.81151500  | 1.76092800  | 3.90425700  |
| C | 0.25311800  | 1.34644400  | 2.49992200  |
| H | 0.29557700  | 0.27792100  | 2.68620800  |
| C | -0.67925100 | 1.84729800  | 1.53901900  |
| C | -0.71642200 | 3.27503800  | 1.35498500  |
| C | -1.67586600 | 3.81161200  | 0.44516700  |
| H | -1.69730600 | 4.88965600  | 0.28840000  |
| C | -2.55218800 | 2.99719000  | -0.21870100 |
| H | -3.28242300 | 3.41569700  | -0.90880600 |
| C | -2.55510400 | 1.55482300  | -0.06461200 |
| C | -1.55749100 | 1.00994800  | 0.79791400  |
| C | -1.47729400 | -0.46220100 | 0.96056200  |
| C | -2.51548800 | -1.18495200 | 1.54660000  |
| C | -2.45943800 | -2.58509400 | 1.79107400  |
| H | -3.32373500 | -3.12475000 | 2.16116600  |
| C | -1.25284200 | -3.22280600 | 1.63835100  |
| H | -1.13986000 | -4.26431900 | 1.93146500  |
| C | -0.12962200 | -2.53118100 | 1.12848700  |
| C | -0.27060400 | -1.19644600 | 0.58524400  |
| C | 0.82585600  | -0.67806800 | -0.17065500 |
| C | 2.09621500  | -1.33627800 | -0.10487600 |
| C | 2.26949200  | -2.52307800 | 0.67571300  |
| H | 3.24929600  | -2.98264800 | 0.75012700  |
| C | 1.15767500  | -3.12836400 | 1.19980200  |
| H | 1.25334200  | -4.08923000 | 1.70149200  |
| C | 1.11423800  | 0.67755500  | -0.67712300 |
| C | 2.39821000  | 1.03754400  | -0.23087400 |
| C | 2.86992600  | 2.36341600  | -0.37657300 |
| H | 3.81207300  | 2.65539300  | 0.08031300  |
| C | 2.14939500  | 3.24812300  | -1.15726800 |
| H | 2.51662300  | 4.26066200  | -1.31116900 |
| C | 0.96258100  | 2.84157300  | -1.82950000 |
| C | 0.43295500  | 1.52504200  | -1.58622600 |
| C | -0.68851800 | 1.09605800  | -2.34558200 |
| H | -1.09080600 | 0.10481300  | -2.16539900 |
| C | -1.26687700 | 1.91861500  | -3.28842300 |
| H | -2.12085300 | 1.56625200  | -3.86180100 |
| C | -0.77912800 | 3.23545400  | -3.49263000 |
| H | -1.25902900 | 3.88474200  | -4.22091600 |
| C | 0.30809500  | 3.68451200  | -2.76939000 |
| H | 0.69920900  | 4.68796200  | -2.92730000 |
| O | -3.40852500 | 0.83815700  | -0.69945300 |
| O | 3.14271000  | 0.04964200  | 0.29420200  |
| S | 3.04853100  | -1.61589900 | -1.79415200 |
| C | 1.98324900  | -2.85645800 | -2.56264800 |
| H | 1.90232400  | -3.72550100 | -1.90757400 |

|    |             |             |             |
|----|-------------|-------------|-------------|
| H  | 1.00153300  | -2.40934200 | -2.73703000 |
| H  | 2.45565700  | -3.12801000 | -3.51094300 |
| O  | 3.11573700  | -0.46435100 | -2.73463700 |
| O  | 4.35361300  | -2.27832600 | -1.46785000 |
| Cs | 6.17984200  | -0.67239500 | 0.60843700  |
| S  | -4.01861200 | -0.45322700 | 2.26093000  |
| O  | -3.99973800 | 1.01794800  | 2.37087100  |
| O  | -5.18555800 | -1.09373800 | 1.58898600  |
| C  | -3.98823900 | -1.05559300 | 3.96449200  |
| H  | -4.08738400 | -2.14033800 | 3.99863100  |
| H  | -3.05292400 | -0.73424100 | 4.42903300  |
| H  | -4.84107800 | -0.57938000 | 4.45728900  |
| Cs | -5.15183800 | -1.30400100 | -1.61543300 |

Imaginary frequency:  $-389.85 \text{ cm}^{-1}$

E(RB3LYP) = -2520.990202

Zero-point correction = 0.459066 (Hartree/Particle)

Thermal correction to Energy = 0.523848

Thermal correction to Enthalpy = 0.525125

Thermal correction to Gibbs Free Energy = 0.341587

Sum of electronic and zero-point Energies =

-2520.531136

Sum of electronic and thermal Energies =

-2520.466354

Sum of electronic and thermal Enthalpies =

-2520.465077

Sum of electronic and thermal Free Energies =

-2520.648615E(RB3LYP/Single point) =

-2521.612753

G = -2521.271166 (unit: a.u.)

(M, R<sub>a</sub>)-INT1

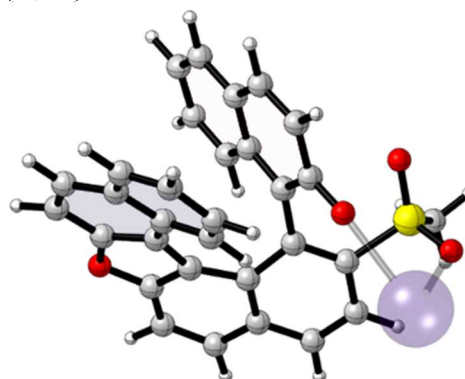

|   |             |             |             |
|---|-------------|-------------|-------------|
| C | -3.18182600 | -3.79077500 | -0.43446500 |
| H | -4.02694000 | -4.45247700 | -0.25887200 |
| C | -1.89400600 | -4.29024800 | -0.46761800 |
| H | -1.71409400 | -5.34879900 | -0.29816800 |
| C | -0.81174100 | -3.42701700 | -0.75242700 |
| H | 0.19791400  | -3.82416900 | -0.80933800 |
| C | -1.02163500 | -2.07364000 | -0.93665100 |
| H | -0.18057000 | -1.42583700 | -1.14584200 |
| C | -2.32364200 | -1.52513500 | -0.87095300 |
| C | -3.43727800 | -2.41468600 | -0.67767600 |
| C | -4.77885900 | -1.94039700 | -0.82167300 |
| H | -5.59563300 | -2.63786300 | -0.65566200 |
| C | -5.04332700 | -0.65613000 | -1.24527900 |
| H | -6.05222400 | -0.30677300 | -1.44165900 |
| C | -3.93727400 | 0.18973800  | -1.42823400 |
| C | -2.61383200 | -0.14517200 | -1.12832900 |
| C | -1.83663800 | 1.05861900  | -1.38942400 |
| C | -2.74286500 | 1.93832700  | -1.99905500 |
| C | -2.39576400 | 3.12866900  | -2.65342300 |
| H | -3.14626400 | 3.73502800  | -3.15074000 |
| C | -1.05532500 | 3.44166900  | -2.67902900 |

|    |             |             |             |
|----|-------------|-------------|-------------|
| H  | -0.70374600 | 4.31061400  | -3.22818300 |
| C  | -0.10593500 | 2.69153600  | -1.91974600 |
| C  | -0.50620500 | 1.55440600  | -1.13205400 |
| C  | 0.33937400  | 1.12837500  | -0.03664800 |
| C  | 1.62090800  | 1.68649200  | 0.02463100  |
| C  | 2.11027900  | 2.59196200  | -0.95015900 |
| H  | 3.13977900  | 2.93195300  | -0.92200300 |
| C  | 1.24520100  | 3.11949300  | -1.87661000 |
| H  | 1.57469200  | 3.90168700  | -2.55524500 |
| C  | -0.17704300 | 0.21408500  | 1.00573100  |
| C  | 0.54518300  | -0.99134000 | 1.27081600  |
| C  | -0.03151900 | -1.89079300 | 2.25094000  |
| H  | 0.49998500  | -2.82345100 | 2.42894500  |
| C  | -1.20173900 | -1.61833900 | 2.90224100  |
| H  | -1.61698900 | -2.33154400 | 3.61336400  |
| C  | -1.90446100 | -0.39499500 | 2.67825200  |
| C  | -1.35629200 | 0.54629100  | 1.73838100  |
| C  | -2.03115400 | 1.80087900  | 1.62095900  |
| H  | -1.62094300 | 2.56581100  | 0.97033700  |
| C  | -3.19445200 | 2.07019700  | 2.31747600  |
| H  | -3.67944600 | 3.03615900  | 2.19285900  |
| C  | -3.75613000 | 1.11147800  | 3.19455600  |
| H  | -4.67557100 | 1.32949800  | 3.73176400  |
| C  | -3.10070900 | -0.09440900 | 3.37387100  |
| H  | -3.49504700 | -0.83755700 | 4.06517200  |
| O  | -4.02554800 | 1.44974700  | -1.96708700 |
| O  | 1.61991500  | -1.31505900 | 0.65468200  |
| S  | 2.75536200  | 1.53360200  | 1.43701800  |
| C  | 3.08683600  | 3.25822800  | 1.86061400  |
| H  | 3.62796000  | 3.76036900  | 1.05876200  |
| H  | 2.13573800  | 3.75627500  | 2.06386600  |
| H  | 3.69862400  | 3.22225200  | 2.76679600  |
| O  | 2.13399100  | 0.95098300  | 2.64118400  |
| O  | 4.03209300  | 0.95253000  | 0.93789200  |
| Cs | 4.00753800  | -1.58306600 | -0.99247100 |

E(RB3LYP) = -1912.261639  
 Zero-point correction= 0.415312 (Hartree/Particle)  
 Thermal correction to Energy= 0.467359  
 Thermal correction to Enthalpy= 0.468636  
 Thermal correction to Gibbs Free Energy= 0.317677  
 Sum of electronic and zero-point Energies  
 = -1911.846328  
 Sum of electronic and thermal Energies  
 = -1911.794280  
 Sum of electronic and thermal Enthalpies  
 = -1911.793004  
 Sum of electronic and thermal Free Energies  
 = -1911.943962  
 E(RB3LYP/Single point) = -1912.759717  
 G = -1912.44204 (unit: a.u.)

TS<sub>INT1</sub>→60

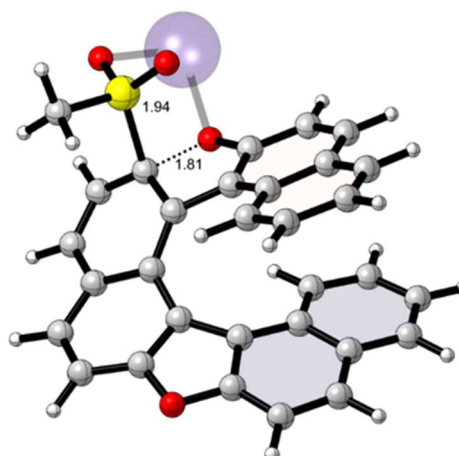

|   |             |             |             |
|---|-------------|-------------|-------------|
| C | -4.43935700 | -2.68880200 | -1.43173400 |
| H | -5.36736200 | -3.25110800 | -1.35462500 |
| C | -3.30146000 | -3.28201400 | -1.94144700 |
| H | -3.32066400 | -4.32393800 | -2.25073900 |
| C | -2.11695000 | -2.52285100 | -2.09515600 |
| H | -1.23849600 | -2.97717700 | -2.54449700 |
| C | -2.07011400 | -1.20762200 | -1.67517700 |
| H | -1.16425600 | -0.62893500 | -1.80404600 |
| C | -3.20365800 | -0.58875000 | -1.09238000 |
| C | -4.43989900 | -1.32197100 | -1.03803500 |
| C | -5.65313000 | -0.66628600 | -0.66650300 |
| H | -6.56876400 | -1.25067000 | -0.62990100 |
| C | -5.69293300 | 0.69657600  | -0.43750900 |
| H | -6.62292900 | 1.22003600  | -0.23684000 |
| C | -4.47152000 | 1.38184600  | -0.47692900 |
| C | -3.22387700 | 0.77195600  | -0.64897400 |
| C | -2.24262200 | 1.82920500  | -0.48164600 |
| C | -2.99352400 | 3.01344700  | -0.42520300 |
| C | -2.46532800 | 4.30775600  | -0.55298800 |
| H | -3.10319500 | 5.18547100  | -0.54763700 |
| C | -1.10041600 | 4.37521200  | -0.77975900 |
| H | -0.63333700 | 5.33359700  | -0.99526700 |
| C | -0.26644800 | 3.22744500  | -0.69880500 |
| C | -0.80976000 | 1.93222200  | -0.33468000 |
| C | 0.07735200  | 0.95124500  | 0.16816500  |
| C | 1.49243000  | 1.15377500  | 0.06125200  |
| C | 1.99753700  | 2.28854400  | -0.65141700 |
| H | 3.06597300  | 2.39882200  | -0.80511600 |
| C | 1.13196800  | 3.31832500  | -0.93965100 |
| H | 1.52900100  | 4.25087300  | -1.33593600 |
| C | -0.14360800 | -0.45228500 | 0.52617400  |
| C | 0.93227100  | -1.20804900 | 0.01695700  |
| C | 0.88362700  | -2.62003300 | 0.02060000  |
| H | 1.68330200  | -3.18844700 | -0.44729400 |
| C | -0.17158900 | -3.25750800 | 0.64966900  |
| H | -0.21057900 | -4.34440300 | 0.67395900  |
| C | -1.20002600 | -2.52605000 | 1.30359700  |
| C | -1.17747100 | -1.08732600 | 1.25948400  |
| C | -2.17321700 | -0.37215500 | 1.98178400  |
| H | -2.13535600 | 0.71208200  | 1.99371300  |
| C | -3.17296200 | -1.03698700 | 2.66207600  |
| H | -3.92565800 | -0.47057900 | 3.20516700  |
| C | -3.22985200 | -2.45468500 | 2.65640500  |
| H | -4.03238300 | -2.96647600 | 3.18138200  |
| C | -2.25651400 | -3.17786400 | 1.99633200  |
| H | -2.27922700 | -4.26588800 | 2.00215300  |
| O | -4.34289200 | 2.74629000  | -0.35159500 |
| O | 1.97446000  | -0.51355400 | -0.46307900 |

|    |            |             |             |
|----|------------|-------------|-------------|
| S  | 2.54649400 | 0.95149800  | 1.67429900  |
| C  | 2.10104800 | 2.46579400  | 2.55259400  |
| H  | 2.39557600 | 3.33334200  | 1.96065700  |
| H  | 1.02236000 | 2.46179300  | 2.72713900  |
| H  | 2.64261700 | 2.44230500  | 3.50243500  |
| O  | 2.16632100 | -0.18484400 | 2.55468400  |
| O  | 3.99156500 | 1.05485700  | 1.29702800  |
| Cs | 5.04734300 | -0.85762400 | -0.98731600 |

Imaginary frequency:  $-388.69\text{ cm}^{-1}$   
 $E(\text{RB3LYP}) = -1912.22275$   
Zero-point correction = 0.413143 (Hartree/Particle)  
Thermal correction to Energy = 0.464538  
Thermal correction to Enthalpy = 0.465815  
Thermal correction to Gibbs Free Energy = 0.317362  
Sum of electronic and zero-point Energies = -1911.809608  
Sum of electronic and thermal Energies = -1911.758213  
Sum of electronic and thermal Enthalpies = -1911.756936  
Sum of electronic and thermal Free Energies = -1911.905388  
 $E(\text{RB3LYP}/\text{Single point}) = -1912.717925$   
 $G = -1912.400563$  (unit: a.u.)

• Stereo-inversion of (*M*, *R<sub>h</sub>*)-INT1

TS<sub>A</sub>

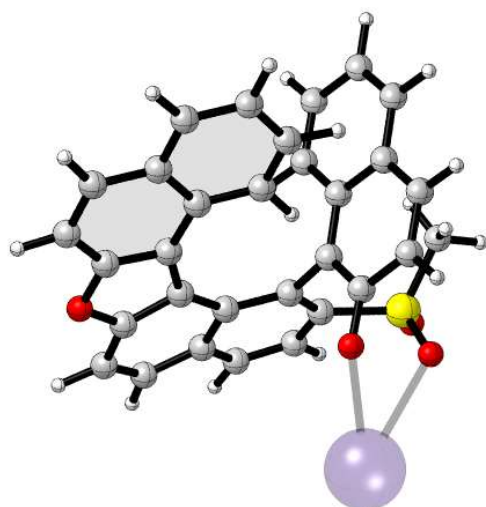

|   |             |             |             |
|---|-------------|-------------|-------------|
| C | -5.60520000 | -0.27642700 | -1.45693400 |
| H | -6.65570300 | -0.06896800 | -1.64649400 |
| C | -5.05125500 | -1.48459200 | -1.82175400 |
| H | -5.65602400 | -2.25602300 | -2.29099500 |
| C | -3.67640800 | -1.68479900 | -1.60043100 |
| H | -3.20580500 | -2.60886300 | -1.91754100 |
| C | -2.90549200 | -0.71233500 | -0.98704500 |
| H | -1.85842800 | -0.87610900 | -0.85244800 |
| C | -3.42831300 | 0.52011200  | -0.54658100 |
| C | -4.82867900 | 0.74576500  | -0.85087800 |
| C | -5.46355900 | 1.99646000  | -0.60576800 |
| H | -6.51292500 | 2.11439500  | -0.86065500 |
| C | -4.74083900 | 3.03011400  | -0.08495100 |
| H | -5.15914900 | 4.01379500  | 0.10343100  |
| C | -3.40172300 | 2.77059200  | 0.24928300  |
| C | -2.66760700 | 1.57970500  | 0.12068300  |
| C | -1.33061200 | 1.87973700  | 0.78715400  |
| C | -1.49311400 | 3.23017000  | 1.17617700  |
| C | -0.64746800 | 4.06659300  | 1.91329700  |

|    |             |             |             |
|----|-------------|-------------|-------------|
| H  | -0.93685900 | 5.09391700  | 2.10852500  |
| C  | 0.48251800  | 3.49420200  | 2.39899700  |
| H  | 1.17399700  | 4.05089200  | 3.02327700  |
| C  | 0.78593100  | 2.13615900  | 2.09179000  |
| C  | -0.03043900 | 1.28396100  | 1.22696300  |
| C  | 0.57405300  | -0.00017200 | 0.91287700  |
| C  | 1.80564200  | -0.34890200 | 1.49682800  |
| C  | 2.49567900  | 0.44510000  | 2.42669500  |
| H  | 3.41926200  | 0.10251200  | 2.87448700  |
| C  | 1.98050700  | 1.68094700  | 2.69572100  |
| H  | 2.50066800  | 2.35379100  | 3.37139000  |
| C  | 0.04180900  | -1.04974000 | 0.00509000  |
| C  | 0.37119200  | -0.97918300 | -1.38305900 |
| C  | 0.04337300  | -2.16029500 | -2.16618800 |
| H  | 0.32180900  | -2.14467300 | -3.21821800 |
| C  | -0.59800500 | -3.24643000 | -1.63274000 |
| H  | -0.83353700 | -4.10562300 | -2.25930200 |
| C  | -0.99307700 | -3.28064500 | -0.26095600 |
| C  | -0.65486900 | -2.15699400 | 0.56779100  |
| C  | -1.06050800 | -2.20276900 | 1.93425500  |
| H  | -0.82976500 | -1.36302600 | 2.58348800  |
| C  | -1.74438500 | -3.29076600 | 2.44487400  |
| H  | -2.04284700 | -3.29339000 | 3.49086700  |
| C  | -2.06386600 | -4.39898800 | 1.62327700  |
| H  | -2.60107500 | -5.24889200 | 2.03588000  |
| C  | -1.68821600 | -4.38199100 | 0.29078700  |
| H  | -1.92815700 | -5.22145800 | -0.35960800 |
| O  | -2.69236700 | 3.76104900  | 0.83686200  |
| O  | 0.91874900  | 0.04042900  | -1.93012800 |
| S  | 2.88358400  | -1.73726000 | 0.94236900  |
| C  | 2.08025500  | -3.34278300 | 0.89993100  |
| H  | 1.46459800  | -3.47079500 | 1.79115900  |
| H  | 1.50170900  | -3.45328600 | -0.01232200 |
| H  | 2.91869600  | -4.04622700 | 0.91316700  |
| O  | 3.36493900  | -1.42198000 | -0.42706400 |
| O  | 3.92704700  | -1.86544600 | 1.99545900  |
| Cs | 3.54747800  | 1.47165400  | -1.79905700 |

Imaginary frequency:  $-37.71\text{ cm}^{-1}$   
 $E(\text{RB3LYP}) = -1912.236333$   
Zero-point correction = 0.415625 (Hartree/Particle)  
Thermal correction to Energy = 0.466546  
Thermal correction to Enthalpy = 0.467823  
Thermal correction to Gibbs Free Energy = 0.319425  
Sum of electronic and zero-point Energies = -1911.820708  
Sum of electronic and thermal Energies = -1911.769786  
Sum of electronic and thermal Enthalpies = -1911.768510  
Sum of electronic and thermal Free Energies = -1911.916908  
 $E(\text{RB3LYP}/\text{Single point}) = -1912.733841$   
 $G = -1912.414416$  (unit: a.u.)

(P, R)-INT2

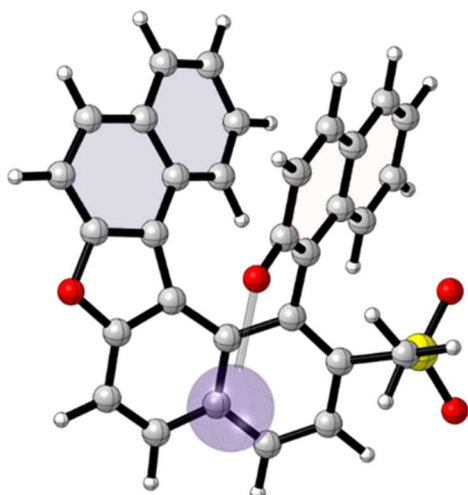

|   |             |             |             |
|---|-------------|-------------|-------------|
| C | 4.79811500  | -2.21802800 | -0.42065500 |
| H | 5.46837500  | -2.84780600 | -1.00129000 |
| C | 5.27448700  | -1.09278200 | 0.22377900  |
| H | 6.32132400  | -0.81388000 | 0.13584900  |
| C | 4.40594400  | -0.32497900 | 1.03232000  |
| H | 4.79012000  | 0.53188800  | 1.57707100  |
| C | 3.06461900  | -0.64363200 | 1.11921900  |
| H | 2.40613400  | -0.05671400 | 1.74570600  |
| C | 2.53500500  | -1.76105900 | 0.43342800  |
| C | 3.43943800  | -2.61244500 | -0.29152500 |
| C | 3.00492900  | -3.88611500 | -0.77521300 |
| H | 3.71019600  | -4.49854300 | -1.33080100 |
| C | 1.75615700  | -4.37884600 | -0.46440900 |
| H | 1.44466900  | -5.38219300 | -0.73809200 |
| C | 0.89593700  | -3.52299900 | 0.24318900  |
| C | 1.17290400  | -2.19022900 | 0.56282400  |
| C | -0.04080300 | -1.67391100 | 1.18432400  |
| C | -0.84800400 | -2.80825000 | 1.36105600  |
| C | -2.01324300 | -2.86298500 | 2.13913900  |
| H | -2.54629800 | -3.79741400 | 2.28478300  |
| C | -2.40505200 | -1.68600100 | 2.73366900  |
| H | -3.26788700 | -1.66232800 | 3.39338600  |
| C | -1.76377800 | -0.44917300 | 2.41193400  |
| C | -0.62351400 | -0.39479500 | 1.52836000  |
| C | -0.31158200 | 0.85918200  | 0.87778800  |
| C | -1.06441800 | 1.97916000  | 1.25258100  |
| C | -2.01455000 | 1.95829000  | 2.30059800  |
| H | -2.52619100 | 2.87119900  | 2.57982000  |
| C | -2.35827200 | 0.75555700  | 2.86590800  |
| H | -3.15430100 | 0.70311000  | 3.60423800  |
| C | 0.63194700  | 0.91151700  | -0.27131400 |
| C | 0.26740400  | 0.19100400  | -1.45112500 |
| C | 1.21587800  | 0.22208700  | -2.54780200 |
| H | 0.95428700  | -0.34773500 | -3.43753500 |
| C | 2.38059000  | 0.93917700  | -2.49244300 |
| H | 3.06572800  | 0.94254300  | -3.33943900 |
| C | 2.72625100  | 1.69819000  | -1.33582700 |
| C | 1.83353600  | 1.67907700  | -0.21206200 |
| C | 2.23027600  | 2.41900400  | 0.94160900  |
| H | 1.58458500  | 2.41928100  | 1.81396300  |
| C | 3.41192500  | 3.12881000  | 0.97823600  |
| H | 3.67965700  | 3.67845700  | 1.87833600  |
| C | 4.28133400  | 3.15105200  | -0.14107400 |
| H | 5.21112900  | 3.71301900  | -0.10284000 |
| C | 3.93239900  | 2.44030100  | -1.27439300 |
| H | 4.58834200  | 2.43166700  | -2.14345000 |
| O | -0.32243600 | -3.91337100 | 0.73955700  |
| O | -0.85319600 | -0.42573200 | -1.58466300 |

|    |             |             |             |
|----|-------------|-------------|-------------|
| S  | -1.21376800 | 3.45763900  | 0.19457600  |
| C  | -2.07259400 | 2.80134200  | -1.24440700 |
| H  | -1.48451700 | 1.99492300  | -1.68396000 |
| H  | -3.05010400 | 2.44117700  | -0.91655100 |
| H  | -2.18506800 | 3.63456900  | -1.94477800 |
| O  | -2.15174000 | 4.38017300  | 0.88814400  |
| O  | 0.07260600  | 4.03546500  | -0.24391300 |
| Cs | 3.74566100  | -0.90281500 | -1.29976200 |

E(RB3LYP) = -1912.261631  
Zero-point correction= 0.415413 (Hartree/Particle)  
Thermal correction to Energy= 0.467295  
Thermal correction to Enthalpy= 0.468572  
Thermal correction to Gibbs Free Energy= 0.319411  
Sum of electronic and zero-point Energies  
= -1911.846218  
Sum of electronic and thermal Energies  
= -1911.794336  
Sum of electronic and thermal Enthalpies  
= -1911.793059  
Sum of electronic and thermal Free Energies  
= -1911.942220  
E(RB3LYP/Single point) = -1912.759795  
G = -1912.440384 (unit: a.u.)

TS<sub>B</sub>

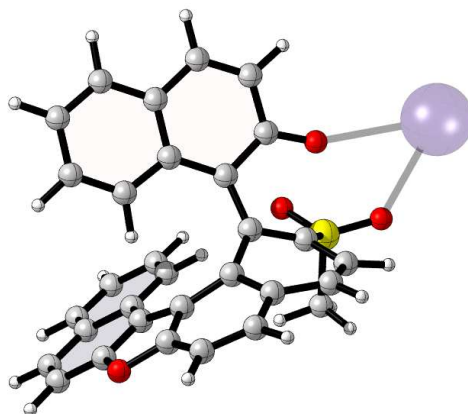

|   |             |             |             |
|---|-------------|-------------|-------------|
| C | 4.61152800  | 0.51408400  | 3.18617900  |
| H | 5.57097500  | 0.64068700  | 3.68256900  |
| C | 3.44636400  | 0.93383200  | 3.79695100  |
| H | 3.47906100  | 1.39747400  | 4.77938500  |
| C | 2.20814000  | 0.75519600  | 3.13865600  |
| H | 1.28497200  | 1.07693200  | 3.61221700  |
| C | 2.15510700  | 0.17183300  | 1.88726400  |
| H | 1.19726800  | 0.05605200  | 1.40342900  |
| C | 3.32999800  | -0.26874900 | 1.23062000  |
| C | 4.59142700  | -0.09691800 | 1.90356100  |
| C | 5.80768600  | -0.54435900 | 1.30179000  |
| H | 6.73879800  | -0.39261900 | 1.84122800  |
| C | 5.81354700  | -1.17264800 | 0.07676000  |
| H | 6.72663800  | -1.53725100 | -0.38352300 |
| C | 4.57324500  | -1.33598100 | -0.56022600 |
| C | 3.34555700  | -0.88934500 | -0.06379100 |
| C | 2.35012600  | -1.26569700 | -1.07608200 |
| C | 3.08287200  | -1.99367100 | -2.03133300 |
| C | 2.52712500  | -2.74695100 | -3.06943900 |
| H | 3.15123700  | -3.27519100 | -3.78313500 |
| C | 1.15394000  | -2.87277400 | -3.04739100 |
| H | 0.65835900  | -3.55083000 | -3.73738000 |
| C | 0.34923300  | -2.19290500 | -2.08547900 |
| C | 0.92348700  | -1.18341400 | -1.22506800 |
| C | -0.03510000 | -0.31732500 | -0.50918500 |

|    |             |             |             |
|----|-------------|-------------|-------------|
| C  | -1.12609700 | -1.09973400 | -0.01588100 |
| C  | -1.62723200 | -2.21576500 | -0.71943800 |
| H  | -2.53734000 | -2.69818400 | -0.37373900 |
| C  | -0.99200700 | -2.62639900 | -1.87155300 |
| H  | -1.42197300 | -3.38319800 | -2.52141700 |
| C  | -0.16618100 | 1.13900200  | -0.52475100 |
| C  | -1.55028000 | 1.60590200  | -0.41452400 |
| C  | -1.87481400 | 2.96405200  | -0.80402200 |
| H  | -2.92788600 | 3.22986800  | -0.75925900 |
| C  | -0.92649500 | 3.87715800  | -1.13218900 |
| H  | -1.19421400 | 4.90675200  | -1.36191200 |
| C  | 0.44821900  | 3.49471400  | -1.19697800 |
| C  | 0.82955600  | 2.13140700  | -0.92765200 |
| C  | 2.20871800  | 1.86043800  | -1.09394000 |
| H  | 2.57276000  | 0.87149500  | -0.92492700 |
| C  | 3.14012600  | 2.81934300  | -1.46231500 |
| H  | 4.18299300  | 2.52648700  | -1.56155600 |
| C  | 2.74983700  | 4.14916600  | -1.69769500 |
| H  | 3.47745500  | 4.90516200  | -1.98034000 |
| C  | 1.40892400  | 4.46535100  | -1.56483700 |
| H  | 1.06114400  | 5.47950600  | -1.75068800 |
| O  | 4.42982600  | -1.98940100 | -1.75537200 |
| O  | -2.52362600 | 0.88113100  | -0.03691500 |
| S  | -1.69295500 | -0.94289800 | 1.68716400  |
| C  | -0.81747700 | -2.33323900 | 2.43857200  |
| H  | 0.25699000  | -2.17832100 | 2.31708400  |
| H  | -1.08563700 | -2.33892000 | 3.49943800  |
| H  | -1.13151800 | -3.26242200 | 1.95840600  |
| O  | -1.17223600 | 0.27186300  | 2.35417300  |
| O  | -3.14225400 | -1.26763100 | 1.80660700  |
| Cs | -5.36983500 | -0.08924400 | -0.01996300 |

Imaginary frequency:  $-24.39 \text{ cm}^{-1}$   
 E(RB3LYP) = -1912.218765 Zero-point correction=  
 0.414178 (Hartree/Particle)  
 Thermal correction to Energy= 0.465266  
 Thermal correction to Enthalpy= 0.466542  
 Thermal correction to Gibbs Free Energy= 0.319219  
 Sum of electronic and zero-point Energies  
 = -1911.804587  
 Sum of electronic and thermal Energies  
 = -1911.753499  
 Sum of electronic and thermal Enthalpies  
 = -1911.752223  
 Sum of electronic and thermal Free Energies  
 = -1911.899546  
 E(RB3LYP/Single point) = -1912.715892  
 G = -1912.396673 (unit: a.u.)

(P)-INT3

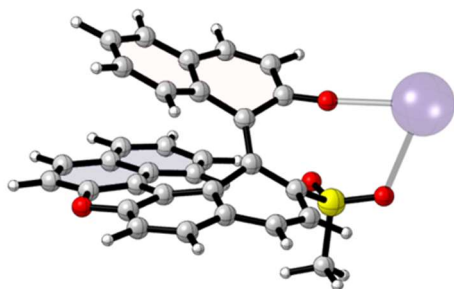

|   |             |             |            |
|---|-------------|-------------|------------|
| C | -4.25358500 | -2.56675000 | 1.78482600 |
| H | -5.18809300 | -3.12035900 | 1.84190500 |

|    |             |             |             |
|----|-------------|-------------|-------------|
| C  | -3.08833600 | -3.10387100 | 2.29536000  |
| H  | -3.09205600 | -4.09346500 | 2.74501700  |
| C  | -1.89459500 | -2.34765600 | 2.25758400  |
| H  | -0.98232100 | -2.74806000 | 2.69070900  |
| C  | -1.87065100 | -1.09647100 | 1.67174800  |
| H  | -0.94626800 | -0.53987500 | 1.67218100  |
| C  | -3.03386000 | -0.54151500 | 1.08179400  |
| C  | -4.26860300 | -1.27530100 | 1.19270100  |
| C  | -5.50120700 | -0.70224900 | 0.75256900  |
| H  | -6.41109500 | -1.28695800 | 0.85928300  |
| C  | -5.55621100 | 0.57414400  | 0.23824600  |
| H  | -6.48995000 | 1.03801400  | -0.06445500 |
| C  | -4.33698900 | 1.25539900  | 0.10333600  |
| C  | -3.07996600 | 0.73297900  | 0.42541500  |
| C  | -2.11771000 | 1.75261800  | 0.01234300  |
| C  | -2.90487600 | 2.83432000  | -0.41673800 |
| C  | -2.41148200 | 4.08560100  | -0.80193000 |
| H  | -3.07913000 | 4.87865000  | -1.12420100 |
| C  | -1.04908200 | 4.26777200  | -0.68705100 |
| H  | -0.61079200 | 5.24205400  | -0.88709000 |
| C  | -0.17964300 | 3.20769800  | -0.28842600 |
| C  | -0.69522000 | 1.87767200  | -0.09245900 |
| C  | 0.26746400  | 0.77155200  | -0.03236000 |
| C  | 1.45144300  | 1.16457200  | 0.68681600  |
| C  | 1.93007100  | 2.48943700  | 0.61361500  |
| H  | 2.89714400  | 2.72941700  | 1.04849400  |
| C  | 1.19280800  | 3.47128700  | -0.01836700 |
| H  | 1.59647500  | 4.46586000  | -0.18362000 |
| C  | 0.05129000  | -0.50373600 | -0.63297900 |
| C  | 1.05654800  | -1.56258400 | -0.52180900 |
| C  | 0.58136800  | -2.93678400 | -0.64973200 |
| H  | 1.27362200  | -3.71755000 | -0.34377600 |
| C  | -0.66028100 | -3.22850600 | -1.11696400 |
| H  | -1.00740100 | -4.25826200 | -1.18022300 |
| C  | -1.49882000 | -2.18800500 | -1.64992000 |
| C  | -1.09379700 | -0.82426900 | -1.49418600 |
| C  | -1.77871200 | 0.12536400  | -2.29258200 |
| H  | -1.42652200 | 1.14766000  | -2.32842700 |
| C  | -2.88441800 | -0.21841000 | -3.06008900 |
| H  | -3.37793700 | 0.54848000  | -3.65253600 |
| C  | -3.36260300 | -1.54088600 | -3.08081900 |
| H  | -4.24625200 | -1.80148900 | -3.65731000 |
| C  | -2.64877800 | -2.51608300 | -2.39827700 |
| H  | -2.94689300 | -3.56093300 | -2.45725100 |
| O  | -4.24438700 | 2.52985900  | -0.39399500 |
| O  | 2.28474500  | -1.35228600 | -0.32973500 |
| S  | 2.19952900  | 0.19200500  | 1.99936200  |
| C  | 1.95111900  | 1.27687200  | 3.42579100  |
| H  | 2.51722300  | 2.20119600  | 3.30293000  |
| H  | 0.88366100  | 1.48511700  | 3.52740900  |
| H  | 2.31714600  | 0.71790800  | 4.29251300  |
| O  | 1.40262500  | -1.02079100 | 2.29679500  |
| O  | 3.67753300  | 0.07358600  | 1.84683800  |
| Cs | 5.05975900  | -0.37541200 | -0.89627800 |

E(RB3LYP) = -1912.231396  
 Zero-point correction= 0.414415 (Hartree/Particle)  
 Thermal correction to Energy= 0.466536  
 Thermal correction to Enthalpy= 0.467813  
 Thermal correction to Gibbs Free Energy= 0.317295  
 Sum of electronic and zero-point Energies  
 = -1911.816981  
 Sum of electronic and thermal Energies  
 = -1911.764860  
 Sum of electronic and thermal Enthalpies

= -1911.763584  
 Sum of electronic and thermal Free Energies  
 = -1911.914102  
 E(RB3LYP/Single point) = -1912.728753  
 G = -1912.411458 (unit: a.u.)

**TSc**

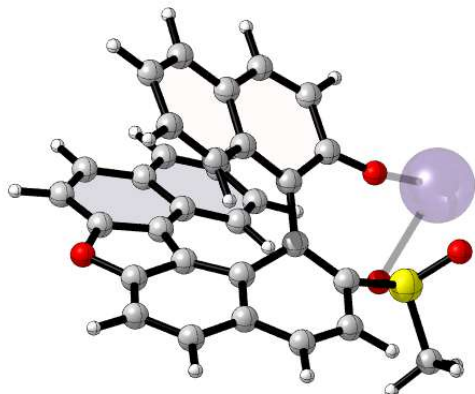

|   |             |             |             |
|---|-------------|-------------|-------------|
| C | 0.96415500  | -3.92500900 | -1.77349700 |
| H | 1.30877300  | -4.94629400 | -1.91890600 |
| C | -0.38351500 | -3.62625000 | -1.81896300 |
| H | -1.11369300 | -4.41410300 | -1.98557200 |
| C | -0.80953500 | -2.28608500 | -1.67710300 |
| H | -1.86554700 | -2.04315600 | -1.75295200 |
| C | 0.10288200  | -1.27618300 | -1.43584200 |
| H | -0.25337600 | -0.26003600 | -1.33586000 |
| C | 1.49102700  | -1.55450800 | -1.34608400 |
| C | 1.93342900  | -2.90545800 | -1.57397200 |
| C | 3.32760300  | -3.21006800 | -1.66538300 |
| H | 3.62062900  | -4.24297100 | -1.83402800 |
| C | 4.28689700  | -2.22287800 | -1.60352300 |
| H | 5.34427900  | -2.43445300 | -1.72891800 |
| C | 3.83446000  | -0.91566400 | -1.36415900 |
| C | 2.50197500  | -0.55956000 | -1.13658900 |
| C | 2.52966700  | 0.86530000  | -0.83531700 |
| C | 3.85956700  | 1.25592200  | -1.04026600 |
| C | 4.32086100  | 2.57732700  | -0.98169500 |
| H | 5.36444000  | 2.81752100  | -1.15968600 |
| C | 3.37233200  | 3.54890700  | -0.73662000 |
| H | 3.65152100  | 4.59911800  | -0.74477300 |
| C | 2.01634000  | 3.21267400  | -0.44055700 |
| C | 1.60709800  | 1.84249800  | -0.34591000 |
| C | 0.35458400  | 1.49234800  | 0.32540300  |
| C | -0.66293100 | 2.48250400  | 0.10867900  |
| C | -0.27431300 | 3.83621700  | -0.06900300 |
| H | -1.02903100 | 4.61179800  | -0.05474600 |
| C | 1.04162200  | 4.21579500  | -0.21078000 |
| H | 1.31992000  | 5.26533000  | -0.23543000 |
| C | 0.37798700  | 0.30749600  | 1.16526700  |
| C | -0.81053400 | -0.45750700 | 1.45820800  |
| C | -0.64254900 | -1.80405500 | 1.99366600  |
| H | -1.54463600 | -2.40793300 | 2.06511000  |
| C | 0.57158400  | -2.30090900 | 2.34470900  |
| H | 0.67580300  | -3.32284100 | 2.70563400  |
| C | 1.73480300  | -1.46133600 | 2.32107700  |
| C | 1.62313200  | -0.12994700 | 1.80207500  |
| C | 2.74101900  | 0.71867800  | 2.03903100  |
| H | 2.68121500  | 1.76732400  | 1.77600200  |
| C | 3.91496700  | 0.25712300  | 2.61226000  |
| H | 4.73761600  | 0.95178800  | 2.76576800  |
| C | 4.04813100  | -1.09064700 | 3.00382100  |
| H | 4.97834400  | -1.45482800 | 3.43185400  |

|    |             |             |             |
|----|-------------|-------------|-------------|
| C  | 2.95037700  | -1.92478000 | 2.87596700  |
| H  | 2.99508700  | -2.95420000 | 3.22638700  |
| O  | 4.66436700  | 0.17862900  | -1.32804500 |
| O  | -1.97765200 | -0.03775600 | 1.22098100  |
| S  | -2.43677700 | 2.22125100  | -0.21300100 |
| C  | -2.89613200 | 3.63846800  | -1.25326000 |
| H  | -2.98209100 | 4.55737800  | -0.67269100 |
| H  | -2.19831200 | 3.74857200  | -2.08500700 |
| H  | -3.88289200 | 3.35361300  | -1.62976200 |
| O  | -2.58726100 | 1.07181900  | -1.14869100 |
| O  | -3.33797400 | 2.33530100  | 0.96325000  |
| Cs | -4.56497100 | -1.06760200 | 0.04483300  |

Imaginary frequency:  $-45.54 \text{ cm}^{-1}$   
 E(RB3LYP) = -1912.228993  
 Zero-point correction= 0.415232 (Hartree/Particle)  
 Thermal correction to Energy= 0.465797  
 Thermal correction to Enthalpy= 0.467074  
 Thermal correction to Gibbs Free Energy= 0.322899  
 Sum of electronic and zero-point Energies  
 = -1911.813761  
 Sum of electronic and thermal Energies  
 = -1911.763196  
 Sum of electronic and thermal Enthalpies  
 = -1911.761920  
 Sum of electronic and thermal Free Energies  
 = -1911.906095  
 E(RB3LYP/Single point) = -1912.725761  
 G = -1912.402862 (unit: a.u.)

**TS5<sup>+</sup>→INT4**

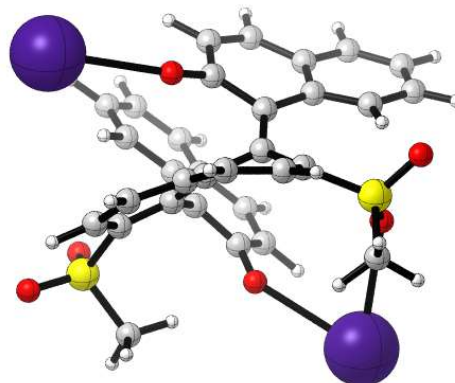

|   |             |             |             |
|---|-------------|-------------|-------------|
| C | -1.04188100 | 4.95910100  | 1.16904300  |
| H | -0.57847800 | 5.64126600  | 1.87911600  |
| C | -2.36080000 | 5.14012900  | 0.77865200  |
| H | -2.96116300 | 5.94455000  | 1.19527400  |
| C | -2.87745600 | 4.29066700  | -0.21323200 |
| H | -3.87813000 | 4.45208700  | -0.60782300 |
| C | -2.11823300 | 3.24066200  | -0.71425000 |
| H | -2.55178400 | 2.66950000  | -1.50772900 |
| C | -0.80649500 | 2.95641100  | -0.27462000 |
| C | -0.24880600 | 3.92352700  | 0.63092700  |
| C | 1.15737100  | 3.90193900  | 0.91281400  |
| H | 1.56226300  | 4.64730500  | 1.59470600  |
| C | 1.96762500  | 3.02573100  | 0.27454300  |
| H | 3.04382500  | 3.04610800  | 0.41024700  |
| C | 1.45937900  | 1.96496900  | -0.58609300 |
| C | -0.00427300 | 1.81190400  | -0.71689400 |
| C | -0.42812700 | 0.61616500  | -1.40409100 |
| C | -1.44308400 | 0.36382800  | -2.39862700 |
| C | -1.07689400 | -0.37874200 | -3.55817900 |
| H | -1.74083600 | -0.35911400 | -4.41738400 |
| C | 0.08359500  | -1.10648400 | -3.63087000 |

|    |             |             |             |
|----|-------------|-------------|-------------|
| H  | 0.37300300  | -1.62243500 | -4.54143600 |
| C  | 0.77035300  | -1.35641100 | -2.40871100 |
| C  | 0.44090400  | -0.58235500 | -1.25211900 |
| C  | 0.83154500  | -1.06627500 | 0.04562600  |
| C  | 1.61803400  | -2.22708500 | 0.09068900  |
| C  | 2.10299400  | -2.87257800 | -1.07066600 |
| H  | 2.74129600  | -3.74302900 | -0.97399300 |
| C  | 1.68409200  | -2.43309400 | -2.30498400 |
| H  | 1.98397600  | -2.95978000 | -3.20786900 |
| C  | 0.32615800  | -0.42059300 | 1.29693200  |
| C  | -1.04329600 | -0.62477200 | 1.63518600  |
| C  | -1.55260500 | 0.13723500  | 2.76110200  |
| H  | -2.61136900 | 0.02646600  | 2.99091200  |
| C  | -0.75990300 | 0.96137400  | 3.51548000  |
| H  | -1.18150300 | 1.52361900  | 4.34805700  |
| C  | 0.63381400  | 1.08536200  | 3.24336900  |
| C  | 1.17971600  | 0.36114800  | 2.12745300  |
| C  | 2.58568900  | 0.46685300  | 1.91737600  |
| H  | 3.02768600  | -0.07761900 | 1.09236600  |
| C  | 3.38953200  | 1.23709000  | 2.73130100  |
| H  | 4.45890400  | 1.28841000  | 2.53515300  |
| C  | 2.83698900  | 1.97745500  | 3.80563600  |
| H  | 3.47423500  | 2.59658300  | 4.43230400  |
| C  | 1.47728600  | 1.89363600  | 4.04695700  |
| H  | 1.02947200  | 2.44458300  | 4.87272700  |
| O  | 2.31318400  | 1.27066000  | -1.20865500 |
| O  | -1.81283400 | -1.45283100 | 1.01694300  |
| S  | 1.82651500  | -3.19829100 | 1.60705900  |
| C  | 0.18174000  | -3.88279600 | 1.85564000  |
| H  | -0.55835700 | -3.07700400 | 1.82602300  |
| H  | -0.00641400 | -4.59401800 | 1.04724400  |
| H  | 0.19241700  | -4.39303900 | 2.82363000  |
| O  | 2.74011200  | -4.32605200 | 1.27342700  |
| O  | 2.19030800  | -2.39278000 | 2.79295100  |
| Cs | 5.01737400  | 0.03559300  | -1.58178500 |
| S  | -3.21552700 | 0.64110800  | -2.34723000 |
| O  | -3.67989100 | 0.72194900  | -0.93924200 |
| O  | -3.65587800 | 1.72399800  | -3.27101500 |
| C  | -3.91895100 | -0.89518600 | -2.99538300 |
| H  | -3.76412400 | -0.97385600 | -4.07133500 |
| H  | -3.47862000 | -1.74708400 | -2.47395500 |
| H  | -4.98922700 | -0.81925300 | -2.78063300 |
| Cs | -4.77008200 | -1.71144300 | 0.71272800  |

E(RB3LYP) = -2520.980692  
 Zero-point correction= 0.460068 (Hartree/Particle)  
 Thermal correction to Energy= 0.524424  
 Thermal correction to Enthalpy= 0.525701  
 Thermal correction to Gibbs Free Energy= 0.344968  
 Sum of electronic and zero-point Energies  
 = -2520.520624  
 Sum of electronic and thermal Energies  
 = -2520.456268  
 Sum of electronic and thermal Enthalpies  
 = -2520.454991  
 Sum of electronic and thermal Free Energies  
 = -2520.635724  
 E(RB3LYP/Single point) = -2521.607367  
 G = -2521.262399 (unit: a.u.)

(*R<sub>a</sub>*)-INT4

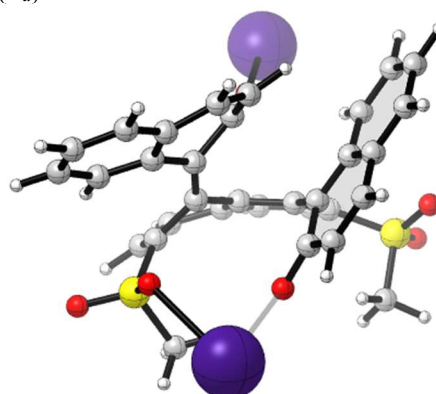

|   |             |             |             |
|---|-------------|-------------|-------------|
| C | -2.64171100 | 3.27398400  | 3.07600200  |
| H | -2.78175600 | 3.20201100  | 4.15265200  |
| C | -3.43014900 | 4.13341500  | 2.32062500  |
| H | -4.21272800 | 4.72251300  | 2.79163300  |
| C | -3.16850800 | 4.25910700  | 0.94583300  |
| H | -3.73290100 | 4.96928200  | 0.34603900  |
| C | -2.19693300 | 3.47466800  | 0.33566700  |
| H | -2.02492600 | 3.59204200  | -0.72676100 |
| C | -1.41974500 | 2.54950900  | 1.06427700  |
| C | -1.61142600 | 2.51909300  | 2.47845900  |
| C | -0.67265800 | 1.79366500  | 3.30820100  |
| H | -0.88707200 | 1.70986800  | 4.37222400  |
| C | 0.50009800  | 1.34180400  | 2.80122600  |
| H | 1.27197200  | 0.90733800  | 3.42853600  |
| C | 0.80300300  | 1.50570700  | 1.37863700  |
| C | -0.35194700 | 1.71653000  | 0.47564300  |
| C | -0.29467700 | 1.25840300  | -0.83879100 |
| C | -1.20914300 | 1.63465800  | -1.90795700 |
| C | -0.66780900 | 1.96371300  | -3.17156900 |
| H | -1.32111500 | 2.41656400  | -3.91383000 |
| C | 0.65169900  | 1.69627900  | -3.47399600 |
| H | 1.08938500  | 1.99721500  | -4.42129300 |
| C | 1.32480500  | 0.73825900  | -2.65158500 |
| C | 0.79072000  | 0.38157200  | -1.36610800 |
| C | 1.19013500  | -0.85296800 | -0.75639000 |
| C | 2.14744300  | -1.62990200 | -1.44125400 |
| C | 2.81815100  | -1.16996600 | -2.59430900 |
| H | 3.58122500  | -1.78763100 | -3.05330000 |
| C | 2.42634900  | 0.01601300  | -3.17366800 |
| H | 2.88083800  | 0.34639300  | -4.10480400 |
| C | 0.60711400  | -1.36353400 | 0.52244600  |
| C | -0.75644700 | -1.79081900 | 0.53459100  |
| C | -1.26290600 | -2.28996000 | 1.80274000  |
| H | -2.29877900 | -2.62115200 | 1.82662200  |
| C | -0.49413800 | -2.37740200 | 2.93115700  |
| H | -0.91859500 | -2.75960200 | 3.85898900  |
| C | 0.87524400  | -1.98765200 | 2.91582100  |
| C | 1.42944200  | -1.49011300 | 1.68728900  |
| C | 2.80959200  | -1.13034900 | 1.71333300  |
| H | 3.26923200  | -0.76557100 | 0.80445300  |
| C | 3.57161400  | -1.23293300 | 2.85814300  |
| H | 4.62021900  | -0.94216000 | -2.83029700 |
| C | 3.00944000  | -1.71366500 | 4.06805000  |
| H | 3.61762600  | -1.78949500 | 4.96607500  |
| C | 1.67877400  | -2.08706800 | 4.08052700  |
| H | 1.21930200  | -2.46561600 | 4.99240900  |
| O | 1.98711900  | 1.55174400  | 0.98620600  |
| O | -1.52102000 | -1.79072400 | -0.50152100 |
| S | 2.35399500  | -3.40530200 | -1.13931100 |
| C | 0.75722000  | -4.06274400 | -1.64861700 |
| H | -0.03838600 | -3.57506600 | -1.08123500 |
| H | 0.63783200  | -3.86376100 | -2.71654000 |
| H | 0.78363900  | -5.13977900 | -1.45642700 |

O 3.36724200 -3.89065700 -2.11695900  
 O 2.58461600 -3.77962700 0.27316100  
 Cs 4.67871600 2.03962900 -0.28845300  
 S -2.94118800 1.31366800 -1.93610400  
 O -3.49247100 1.02329600 -0.58850400  
 O -3.62860400 2.36152400 -2.74352200  
 C -3.04528900 -0.22625400 -2.87326000  
 H -2.60438400 -0.06310700 -3.85937800  
 H -2.48664600 -0.97997900 -2.31010500  
 H -4.10437800 -0.48572900 -2.97378100  
 Cs -4.77951100 -1.67725000 0.11711300  
 E(RB3LYP) = -2520.98903  
 Zero-point correction= 0.460283 (Hartree/Particle)  
 Thermal correction to Energy= 0.525682  
 Thermal correction to Enthalpy= 0.526958  
 Thermal correction to Gibbs Free Energy= 0.342838  
 Sum of electronic and zero-point Energies  
 = -2520.528747  
 Sum of electronic and thermal Energies  
 = -2520.463348  
 Sum of electronic and thermal Enthalpies  
 = -2520.462071  
 Sum of electronic and thermal Free Energies  
 = -2520.646191  
 E(RB3LYP/Single point) = -2521.615531  
 G = -2521.272693 (unit: a.u.)

**TS<sub>INT4→INT5</sub>**

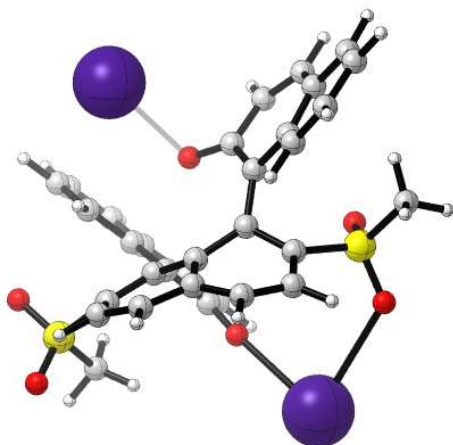

C 0.16180300 5.78742400 0.47623600  
 H 0.44297200 6.55660600 1.19327500  
 C -0.36976300 6.13634100 -0.75385500  
 H -0.53096200 7.17923400 -1.01374600  
 C -0.65344200 5.11122200 -1.68406300  
 H -1.01244300 5.36585100 -2.67874400  
 C -0.47367500 3.78109800 -1.34877300  
 H -0.68991300 3.02538600 -2.09464300  
 C -0.00211200 3.37820800 -0.06335600  
 C 0.39167600 4.43371600 0.82202600  
 C 1.08633300 4.08881000 2.02782600  
 H 1.31993200 4.87765700 2.74147000  
 C 1.52326000 2.81504700 2.22455000  
 H 2.12624400 2.55058600 3.09095000  
 C 1.27264300 1.73596400 1.26737800  
 C 0.23305400 1.97493200 0.28671400  
 C -0.59238000 0.99512400 -0.41050200  
 C -1.94734200 1.39460800 -0.59312100  
 C -2.64858400 1.19891300 -1.80461500  
 H -3.64806100 1.60336700 -1.93249100  
 C -2.00452700 0.55339500 -2.83081200  
 H -2.44173800 0.47965600 -3.82241700

C -0.83629100 -0.21221300 -2.52862700  
 C -0.24489400 -0.19979500 -1.21480100  
 C 0.47115200 -1.38204700 -0.79195200  
 C 0.76607100 -2.34544300 -1.77355300  
 C 0.46949200 -2.15710100 -3.14302800  
 H 0.76709300 -2.90023800 -3.87271800  
 C -0.34762700 -1.11645700 -3.50495900  
 H -0.71807100 -1.03766600 -4.52390300  
 C 0.58976600 -1.71841500 0.65041300  
 C -0.64885200 -1.91681600 1.34244000  
 C -0.55363100 -2.32907900 2.73116000  
 H -1.49289600 -2.45459300 3.26726700  
 C 0.64107300 -2.60126800 3.34154700  
 H 0.66749500 -2.93189800 4.37945600  
 C 1.87486500 -2.46610900 2.63754300  
 C 1.83840300 -2.01549500 1.27433400  
 C 3.09128100 -1.86856000 0.61317200  
 H 3.09696400 -1.52786300 -0.41612300  
 C 4.28695100 -2.13801000 1.24431700  
 H 5.22180900 -2.01066200 0.70129100  
 C 4.31346000 -2.58148400 2.59150400  
 H 5.26048000 -2.79227800 3.08251900  
 C 3.11712900 -2.73966100 3.26693300  
 H 3.10828400 -3.07472400 4.30310000  
 O 1.95806500 0.68289200 1.34586600  
 O -1.80341900 -1.82024800 0.78807200  
 S 1.29389300 -4.06277900 -1.44205600  
 C 0.38138400 -4.68152700 -0.61524500  
 H 0.86608200 -4.38276300 0.91105100  
 H -0.64750000 -4.31978600 -0.06625000  
 H 0.41002500 -5.76923400 -0.13515100  
 O 0.79805400 -4.85597900 -2.60098600  
 O 2.74760500 -4.16112100 -1.16900800  
 Cs 4.19968900 1.62790400 -0.78568600  
 S -2.91521100 2.11286900 0.73571100  
 O -4.25686500 1.46657400 0.60585600  
 O -2.22934700 1.98527500 2.03983800  
 C -3.22033400 3.86357500 0.43082100  
 H -2.31881000 4.43878400 0.63230300  
 H -3.54981700 3.99205800 -0.60212600  
 H -4.01981600 4.14479500 1.12299800  
 Cs -4.66854500 -1.68001800 0.24661700

Imaginary frequency: -26.85 cm<sup>-1</sup>  
 E(RB3LYP) = -2520.97390296  
 Zero-point correction= 0.459556 (Hartree/Particle)  
 Thermal correction to Energy= 0.523976  
 Thermal correction to Enthalpy= 0.525253  
 Thermal correction to Gibbs Free Energy= 0.342441  
 Sum of electronic and zero-point Energies  
 = -2520.514347  
 Sum of electronic and thermal Energies  
 = -2520.449927  
 Sum of electronic and thermal Enthalpies  
 = -2520.448650  
 Sum of electronic and thermal Free Energies  
 = -2520.631462  
 E(RB3LYP/Single point) = -2521.59967783  
 G = -2521.257237 (unit: a.u.)



(*meso*)-INT5

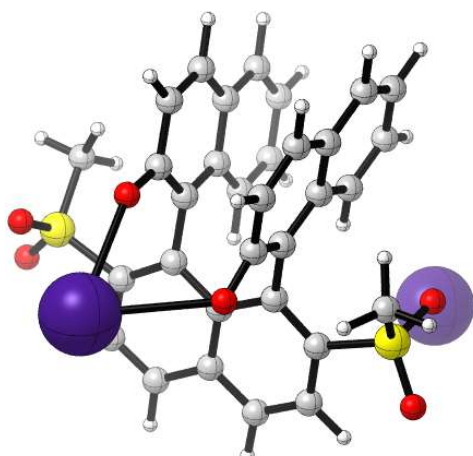

|   |             |             |             |
|---|-------------|-------------|-------------|
| C | 0.58767700  | 4.40162500  | 1.46192400  |
| H | 0.61144400  | 5.03919300  | 2.34441300  |
| C | 1.42953600  | 4.65803300  | 0.39309100  |
| H | 2.12135800  | 5.49602900  | 0.42118000  |
| C | 1.37195800  | 3.81547700  | -0.74483500 |
| H | 2.02271200  | 4.01291500  | -1.59444600 |
| C | 0.50375100  | 2.74232000  | -0.78775600 |
| H | 0.48706400  | 2.11199300  | -1.67176900 |
| C | -0.36680000 | 2.43605700  | 0.30606200  |
| C | -0.31761000 | 3.31417800  | 1.44556600  |
| C | -1.20010400 | 3.05462200  | 2.53466600  |
| H | -1.15828300 | 3.71032800  | 3.40371100  |
| C | -2.08074800 | 2.00578100  | 2.49955500  |
| H | -2.74909600 | 1.81532900  | 3.33737200  |
| C | -2.18276900 | 1.09824400  | 1.36774900  |
| C | -1.28013800 | 1.34840700  | 0.28788100  |
| C | -1.34639900 | 0.53198700  | -0.95927700 |
| C | -2.24494000 | 0.89427000  | -1.96197000 |
| C | -2.24325900 | 0.31745400  | -3.25585000 |
| H | -2.96451100 | 0.64749500  | -3.99380500 |
| C | -1.28706600 | -0.60969500 | -3.57327600 |
| H | -1.23579900 | -1.02999300 | -4.57403900 |
| C | -0.34259700 | -1.03292200 | -2.60381500 |
| C | -0.39189300 | -0.52029800 | -1.25946700 |
| C | 0.51380900  | -1.08607500 | -0.27597400 |
| C | 1.45849700  | -2.00640200 | -0.72502700 |
| C | 1.55557500  | -2.43826800 | -2.07065500 |
| H | 2.31084100  | -3.16220900 | -2.35256900 |
| C | 0.64949800  | -1.97250300 | -2.98527800 |
| H | 0.67205500  | -2.32285800 | -4.01360900 |
| C | 0.33056900  | -0.88151500 | 1.19006000  |
| C | -0.62214900 | -1.75219600 | 1.80582600  |
| C | -0.79527800 | -1.58934800 | 3.23589300  |
| H | -1.54474500 | -2.21901100 | 3.71234200  |
| C | -0.05678100 | -0.70415400 | 3.97603000  |
| H | -0.21610200 | -0.61792500 | 5.05049300  |
| C | 0.94133500  | 0.11639800  | 3.36920400  |
| C | 1.13045700  | 0.01473200  | 1.94756100  |
| C | 2.13439600  | 0.84068700  | 1.36411500  |
| H | 2.28295900  | 0.78947200  | 0.29195400  |
| C | 2.90467500  | 1.69806600  | 2.12356700  |
| H | 3.66050500  | 2.31318800  | 1.63994900  |
| C | 2.70412700  | 1.80076000  | 3.52300800  |
| H | 3.30422400  | 2.48848700  | 4.11369000  |
| C | 1.73232900  | 1.01879800  | 4.12365100  |
| H | 1.55958200  | 1.08418600  | 5.19693100  |
| O | -3.03426600 | 0.14891700  | 1.37079500  |
| O | -1.25929100 | -2.66844000 | 1.16776500  |
| S | 2.73353500  | -2.76406000 | 0.33690200  |

|    |             |             |             |
|----|-------------|-------------|-------------|
| C  | 2.03980500  | -3.32533600 | 1.89686900  |
| H  | 1.96295800  | -2.49521800 | 2.59495000  |
| H  | 1.06654200  | -3.78144100 | 1.70518400  |
| H  | 2.75519500  | -4.07342600 | 2.25329900  |
| O  | 3.17998000  | -3.98978400 | -0.37648600 |
| O  | 3.78165500  | -1.74637300 | 0.61579800  |
| Cs | 4.89265400  | 0.31064400  | -1.61174700 |
| S  | -3.59385700 | 2.11429800  | -1.76444800 |
| O  | -3.92642600 | 2.56039200  | -3.14536200 |
| O  | -4.69135100 | 1.50076500  | -0.98192100 |
| C  | -3.02671800 | 3.59447600  | -0.91325500 |
| H  | -2.93674300 | 3.41320600  | 0.15474400  |
| H  | -2.08002200 | 3.91805100  | -1.34832200 |
| H  | -3.81092200 | 4.32977800  | -1.12119700 |
| Cs | -4.12856200 | -2.27822800 | 0.11484700  |

E(RB3LYP) = -2521.04457460  
Zero-point correction= 0.461832 (Hartree/Particle)  
Thermal correction to Energy= 0.526845  
Thermal correction to Enthalpy= 0.528122  
Thermal correction to Gibbs Free Energy= 0.344823  
Sum of electronic and zero-point Energies  
= -2520.582743  
Sum of electronic and thermal Energies  
= -2520.517729  
Sum of electronic and thermal Enthalpies  
= -2520.516452  
Sum of electronic and thermal Free Energies  
= -2520.699752  
E(RB3LYP/Single point) = -2521.66949398  
G = -2521.324671 (unit: a.u.)

MeSO<sub>2</sub>Cs

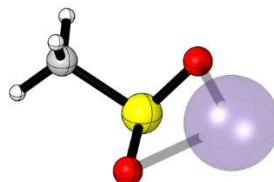

|    |             |             |             |
|----|-------------|-------------|-------------|
| S  | -2.20543500 | 0.00001100  | -0.52558400 |
| C  | -3.08486600 | -0.00003900 | 1.09252500  |
| H  | -3.70904600 | 0.89743400  | 1.16546500  |
| H  | -3.70902100 | -0.89753300 | 1.16542200  |
| H  | -2.32403700 | -0.00004800 | 1.88252800  |
| O  | -1.32637200 | -1.27077100 | -0.39959100 |
| O  | -1.32640100 | 1.27080700  | -0.39952800 |
| Cs | 1.54109900  | -0.00000100 | 0.07334100  |

E(RB3LYP) = -608.789286851  
Zero-point correction= 0.044659 (Hartree/Particle)  
Thermal correction to Energy= 0.055555  
Thermal correction to Enthalpy= 0.056832  
Thermal correction to Gibbs Free Energy  
= -0.005859  
Sum of electronic and zero-point Energies  
= -608.744628  
Sum of electronic and thermal Energies  
= -608.733732  
Sum of electronic and thermal Enthalpies  
= -608.732455  
Sum of electronic and thermal Free Energies  
= -608.795146  
E(RB3LYP/Single point) = -608.9094733  
G = -608.9153323 (unit: a.u.)

## NMR Spectra

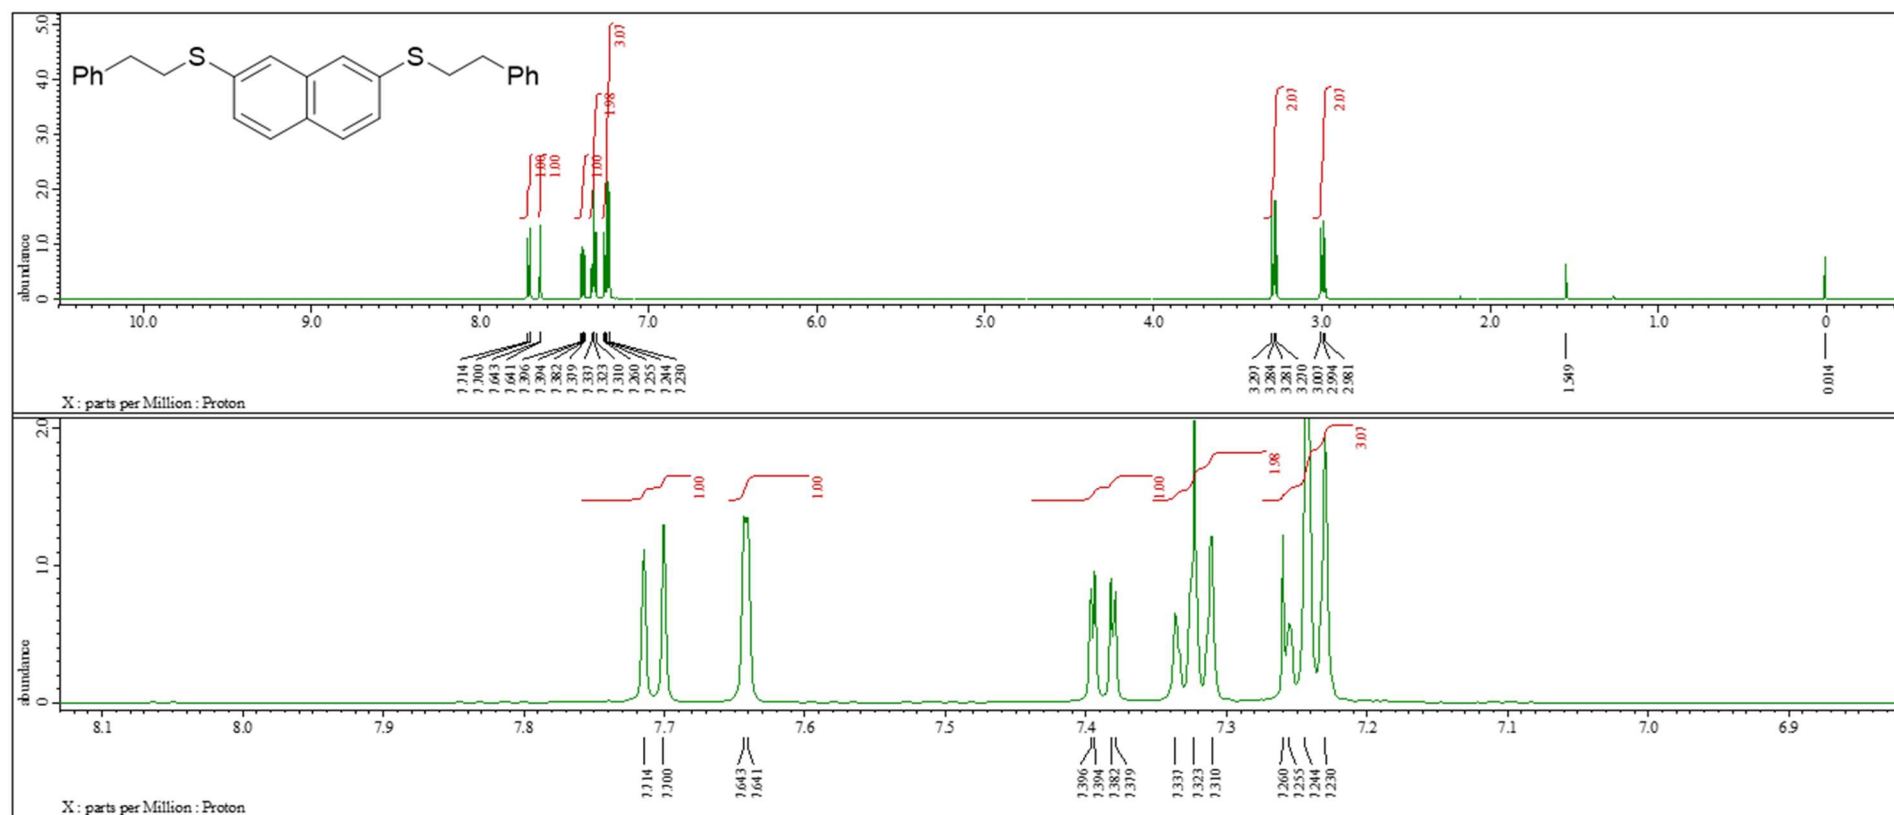

**Fig. S38**  $^1\text{H}$  NMR spectrum of **2** in  $\text{CDCl}_3$ .

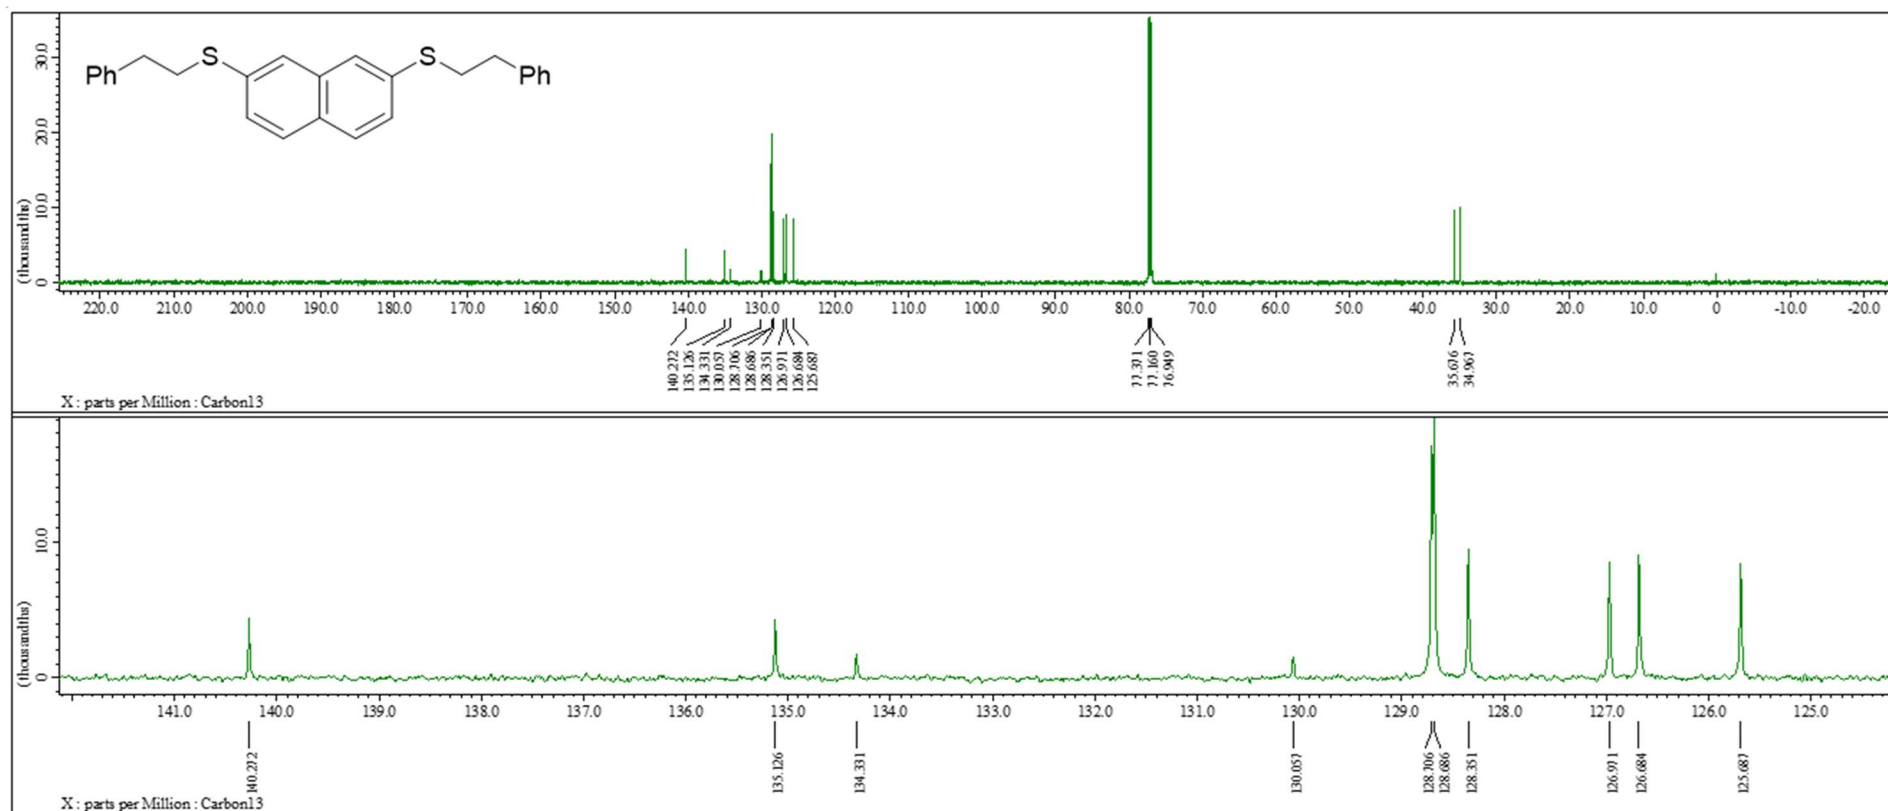

Fig. S39  $^{13}\text{C}$  NMR spectrum of **2** in  $\text{CDCl}_3$ .

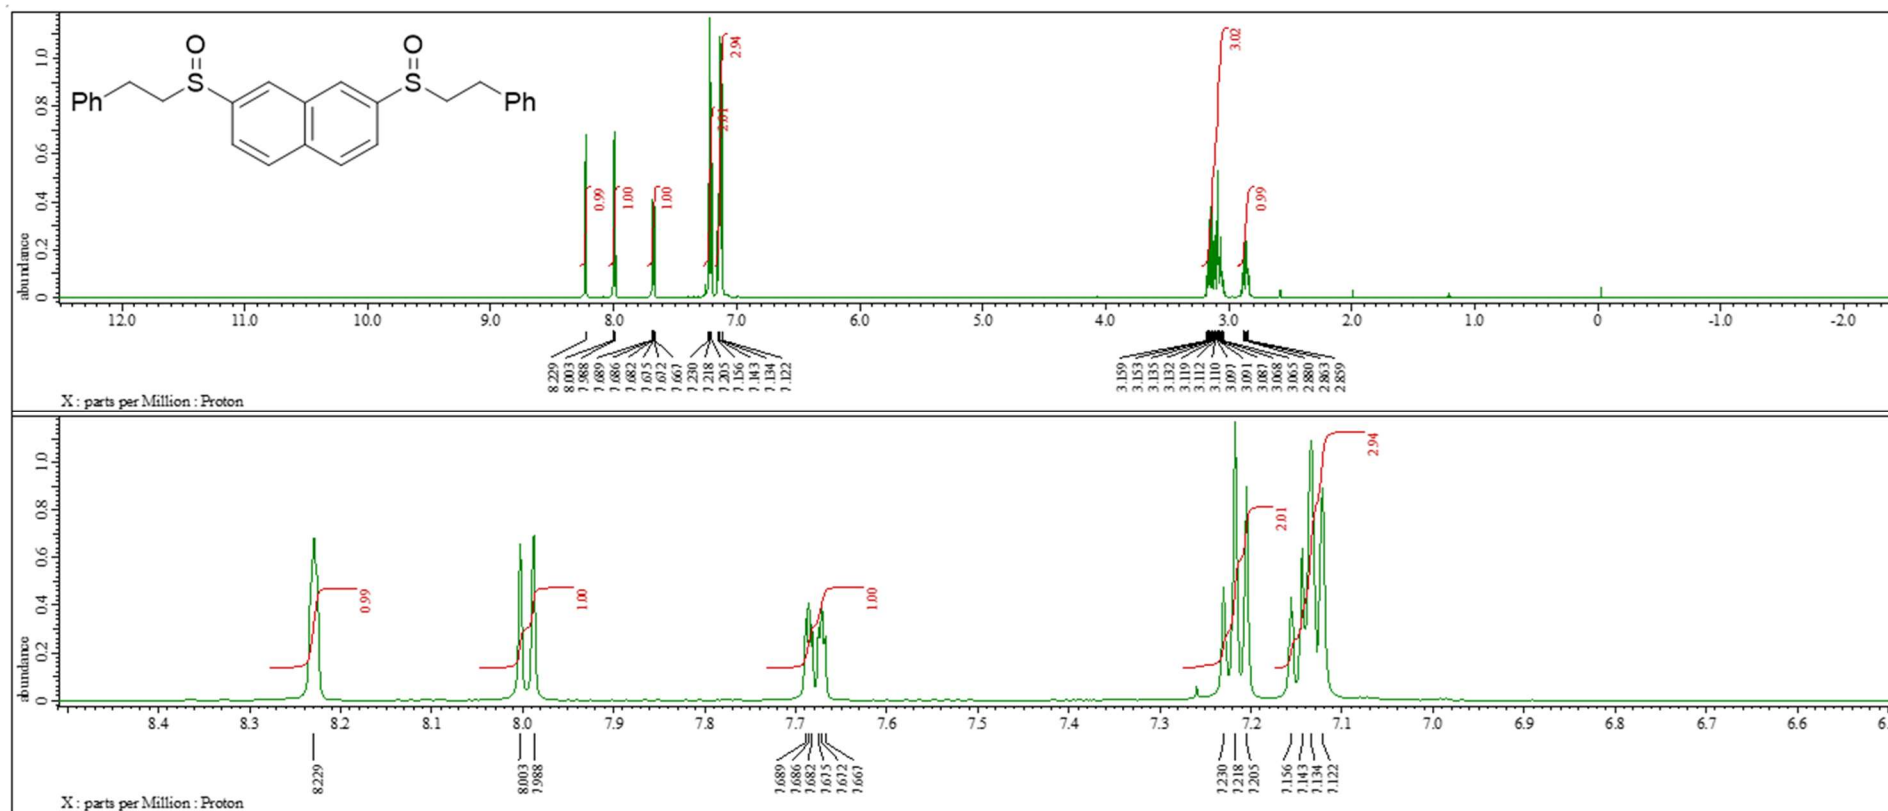

Fig. S40  $^1\text{H}$  NMR spectrum of **3** in  $\text{CDCl}_3$ .

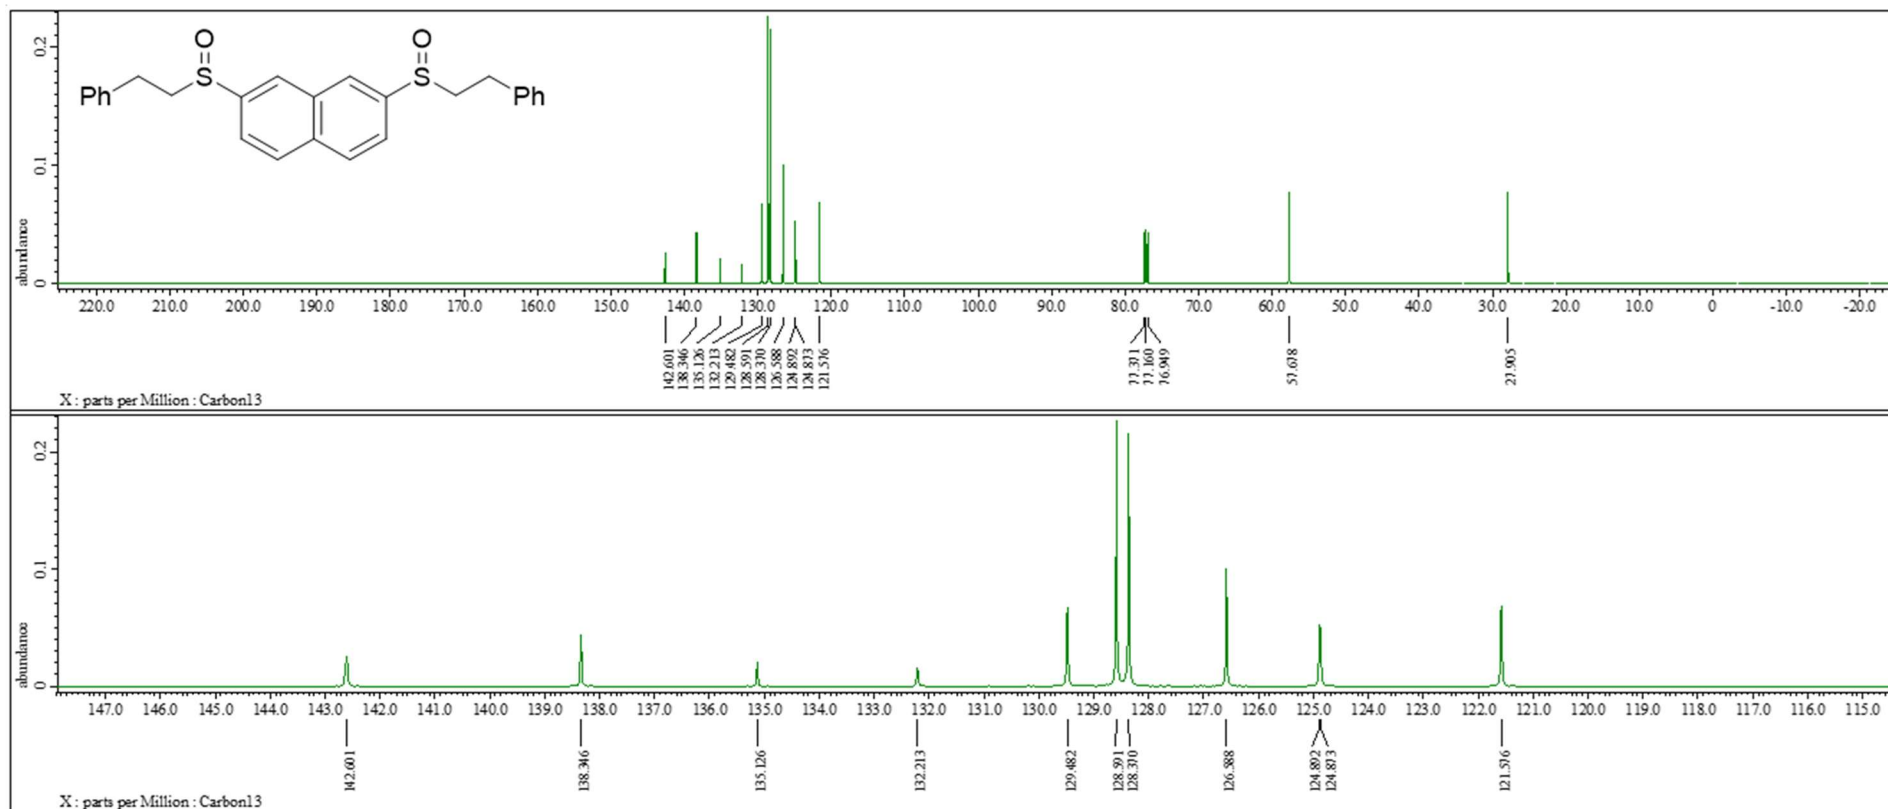

**Fig. S41**  $^{13}\text{C}$  NMR spectrum of **3** in  $\text{CDCl}_3$ .

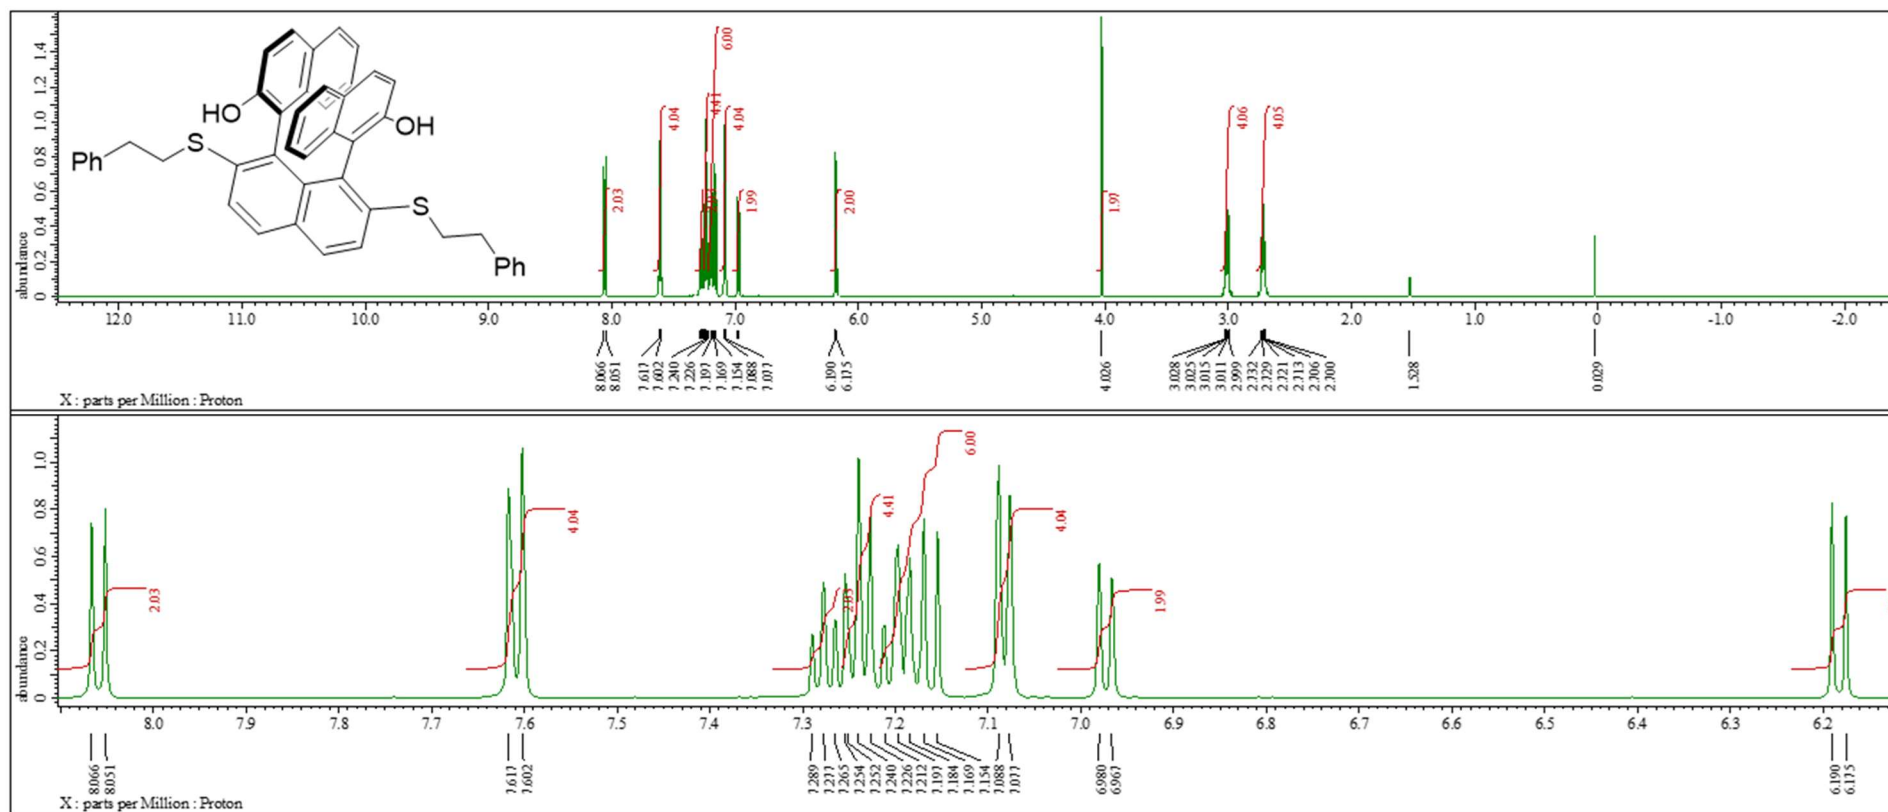

**Fig. S42**  $^1\text{H}$  NMR spectrum of (*rac*)-**4** in  $\text{CDCl}_3$ .

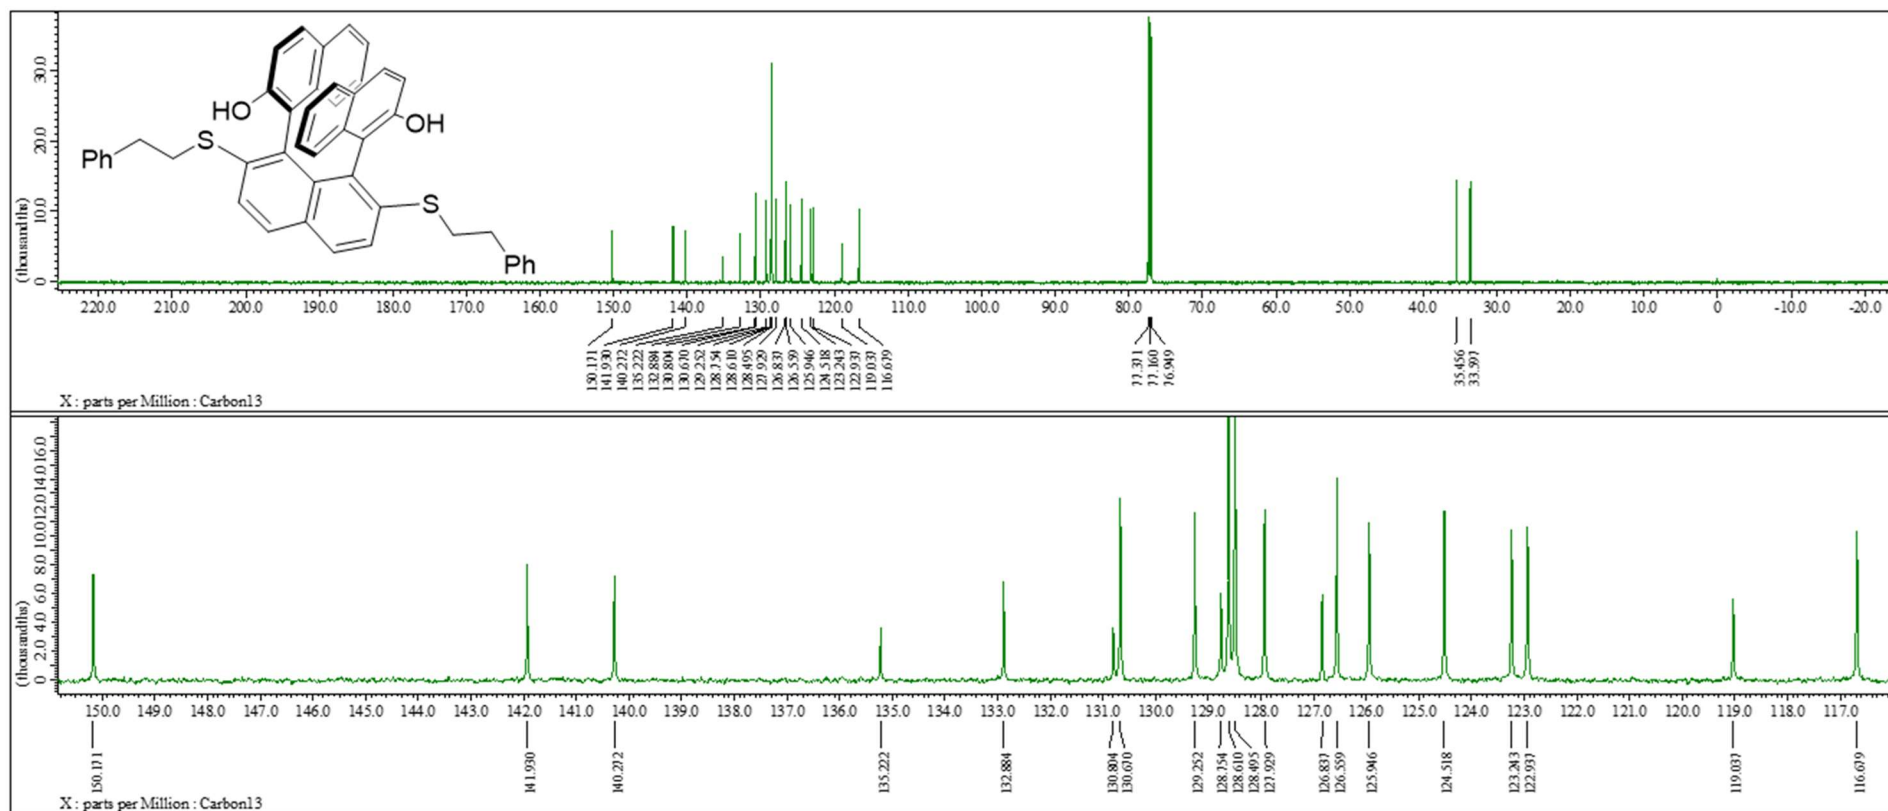

Fig. S43 <sup>13</sup>C NMR spectrum of (rac)-4 in CDCl<sub>3</sub>.

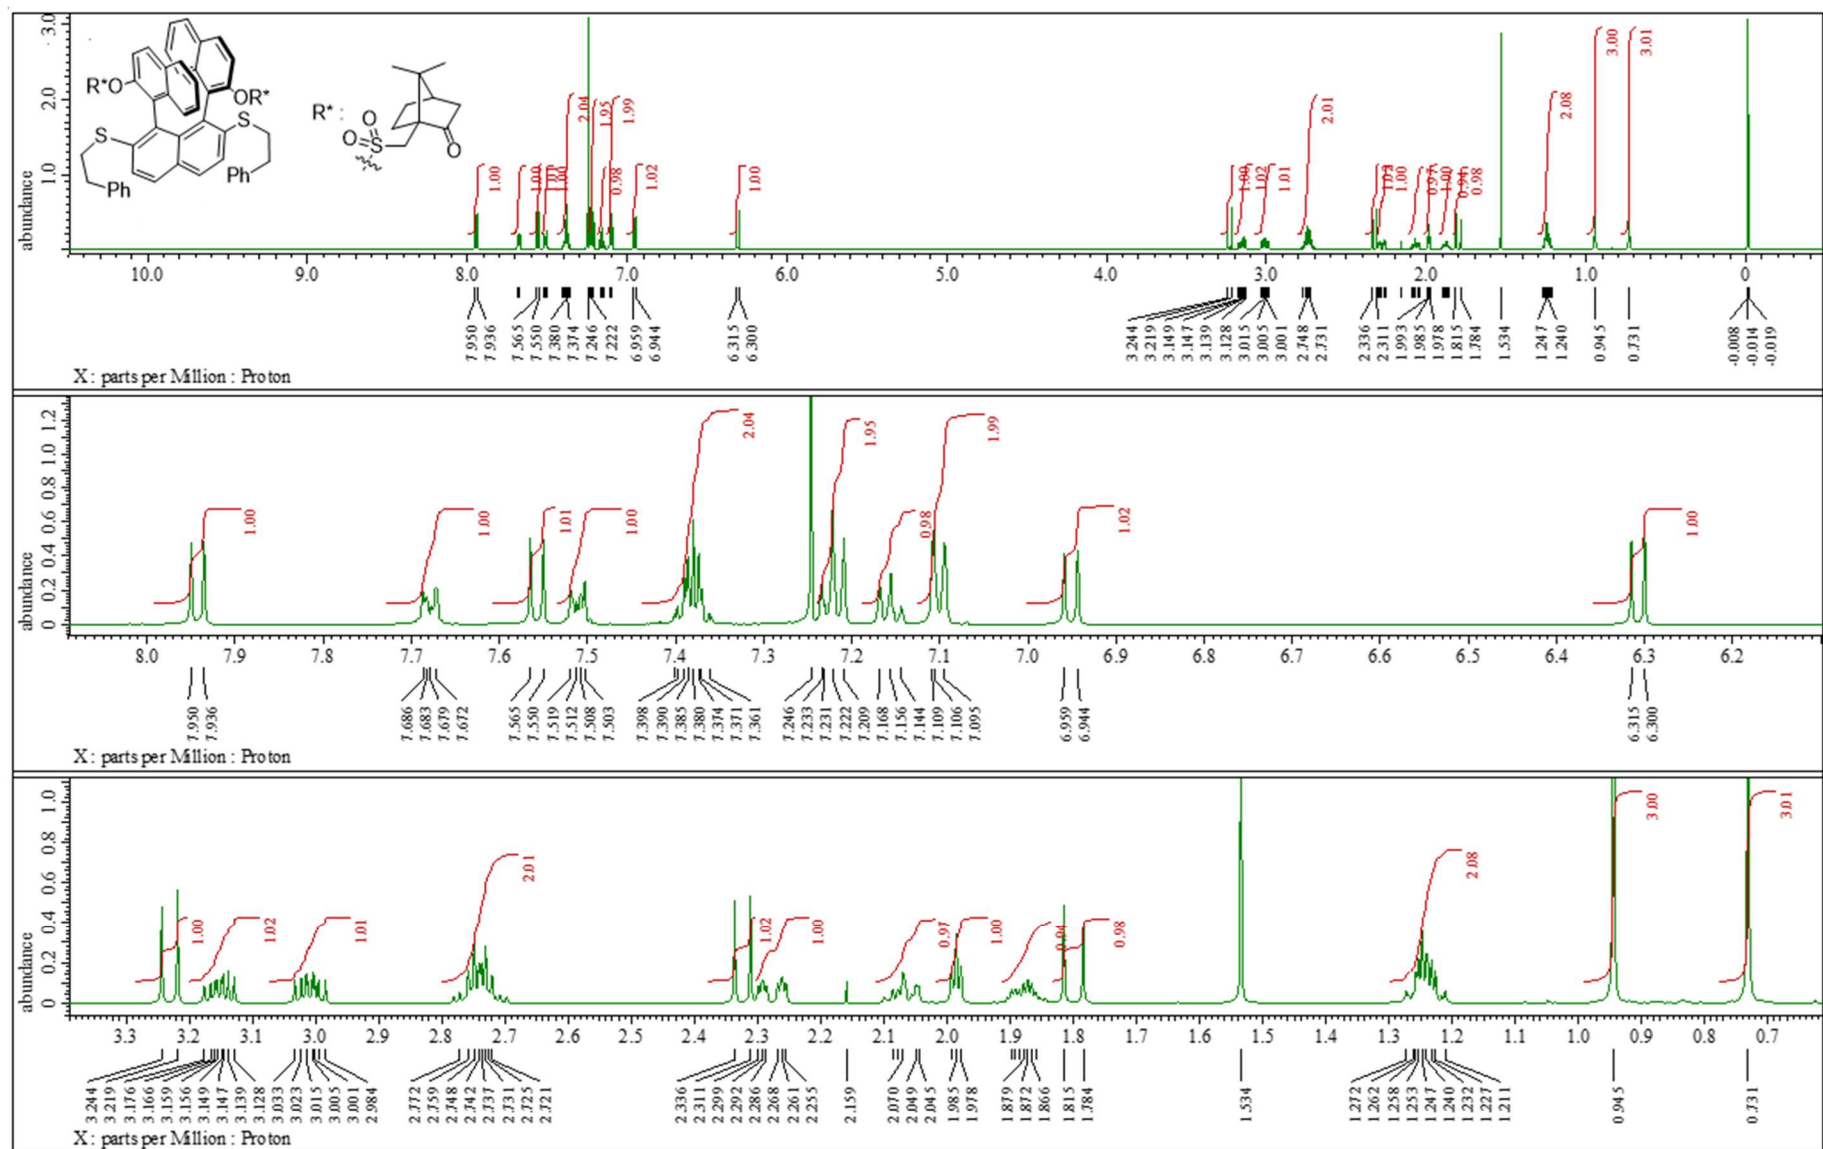

Fig. S44  $^1\text{H}$  NMR spectrum of  $(R_a, R_a)\text{-4}'$  in  $\text{CDCl}_3$ .



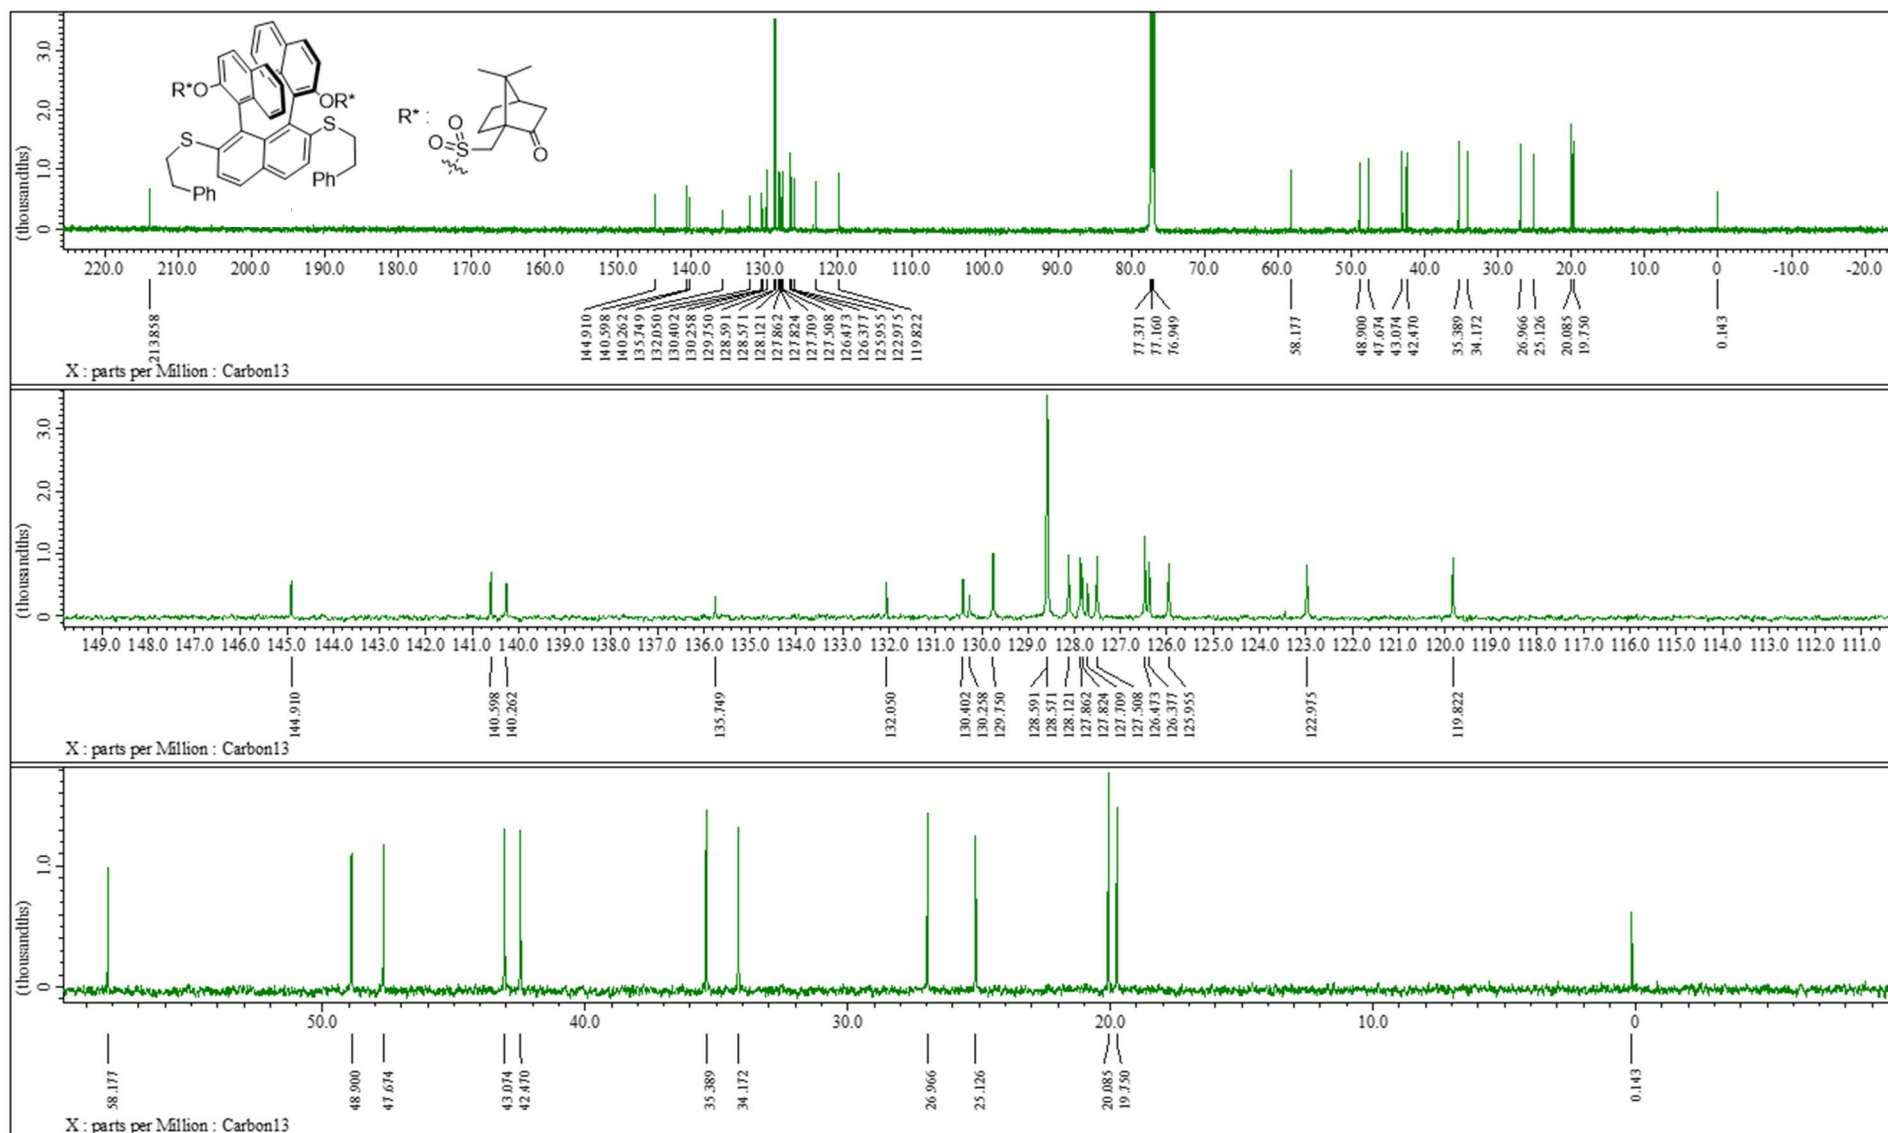

Fig. S45  $^{13}C$  NMR spectrum of  $(R_a,R_a)$ -4' in  $CDCl_3$ .

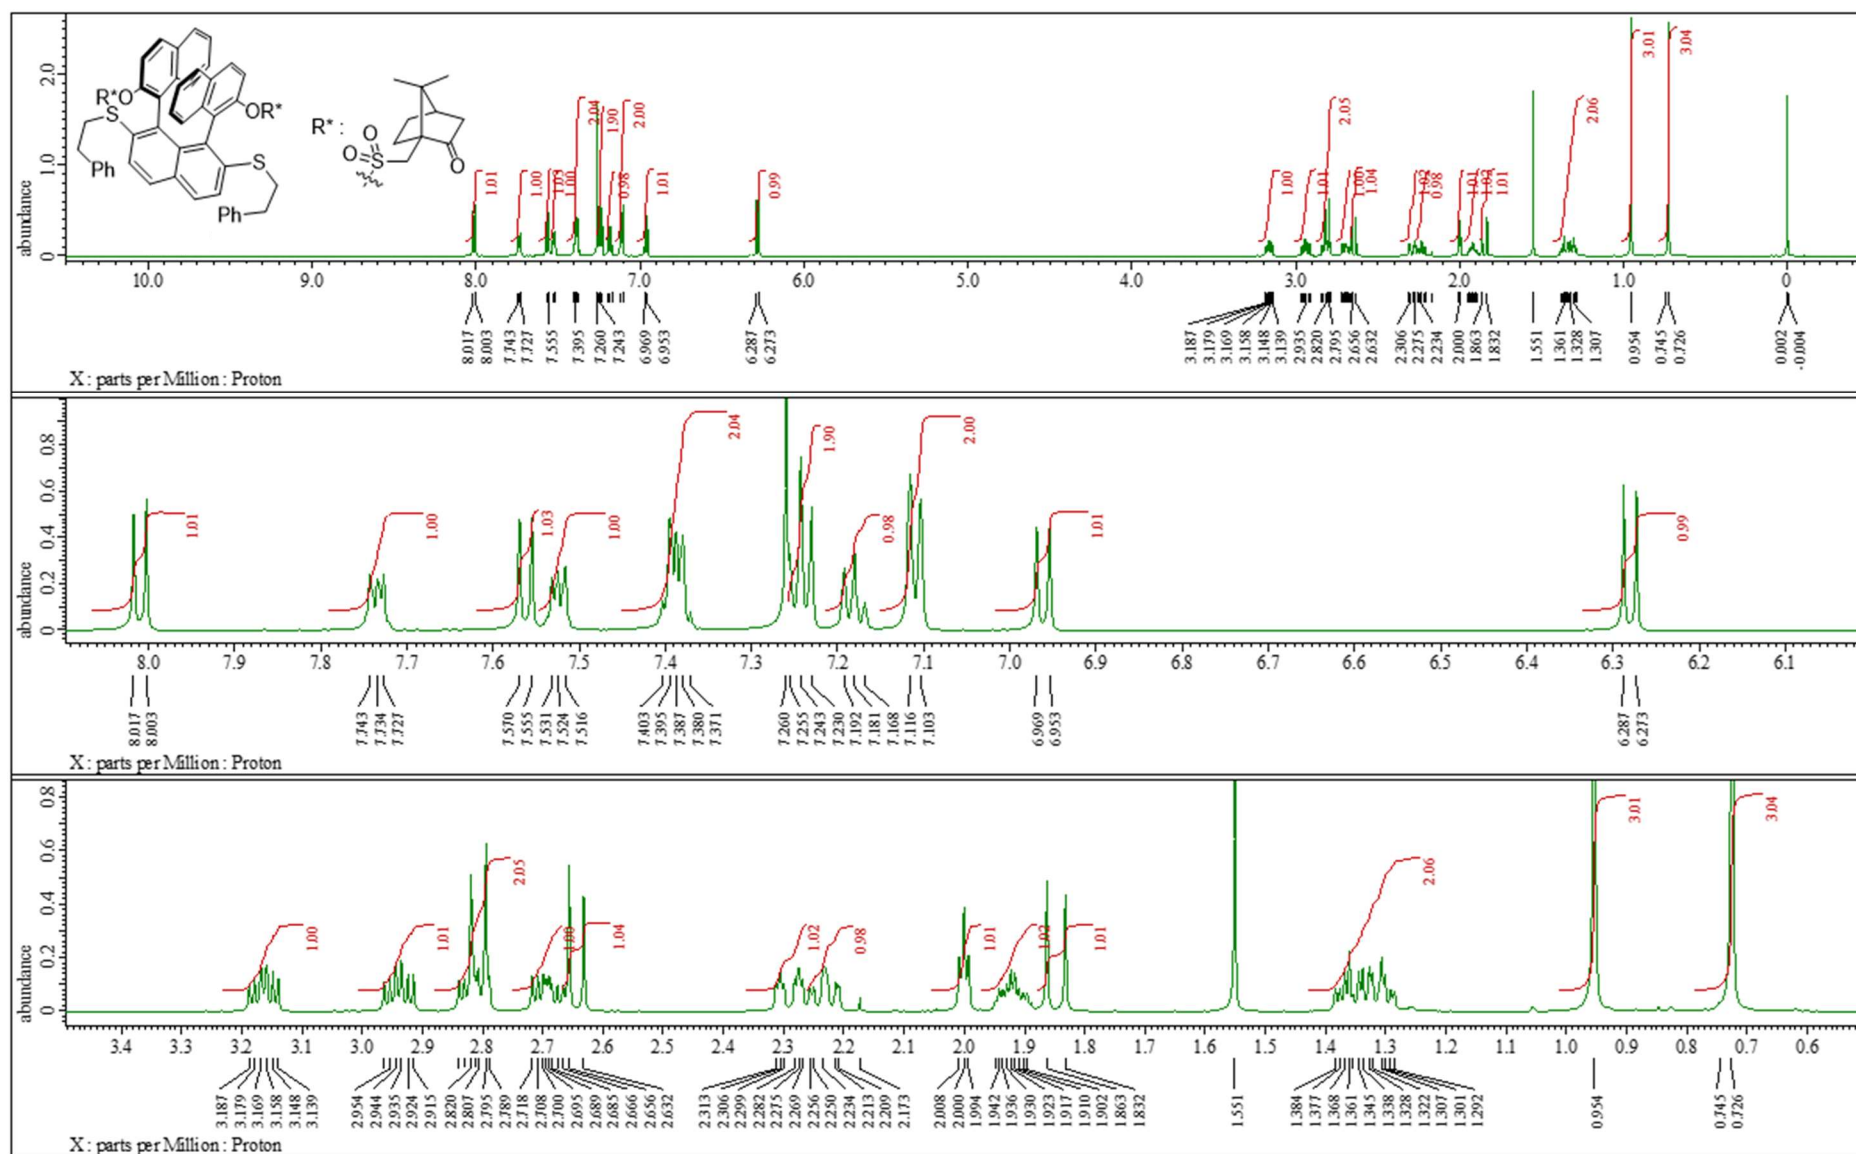

Fig. S46  $^1\text{H}$  NMR spectrum of  $(S_a, S_a)$ -4' in  $\text{CDCl}_3$ .

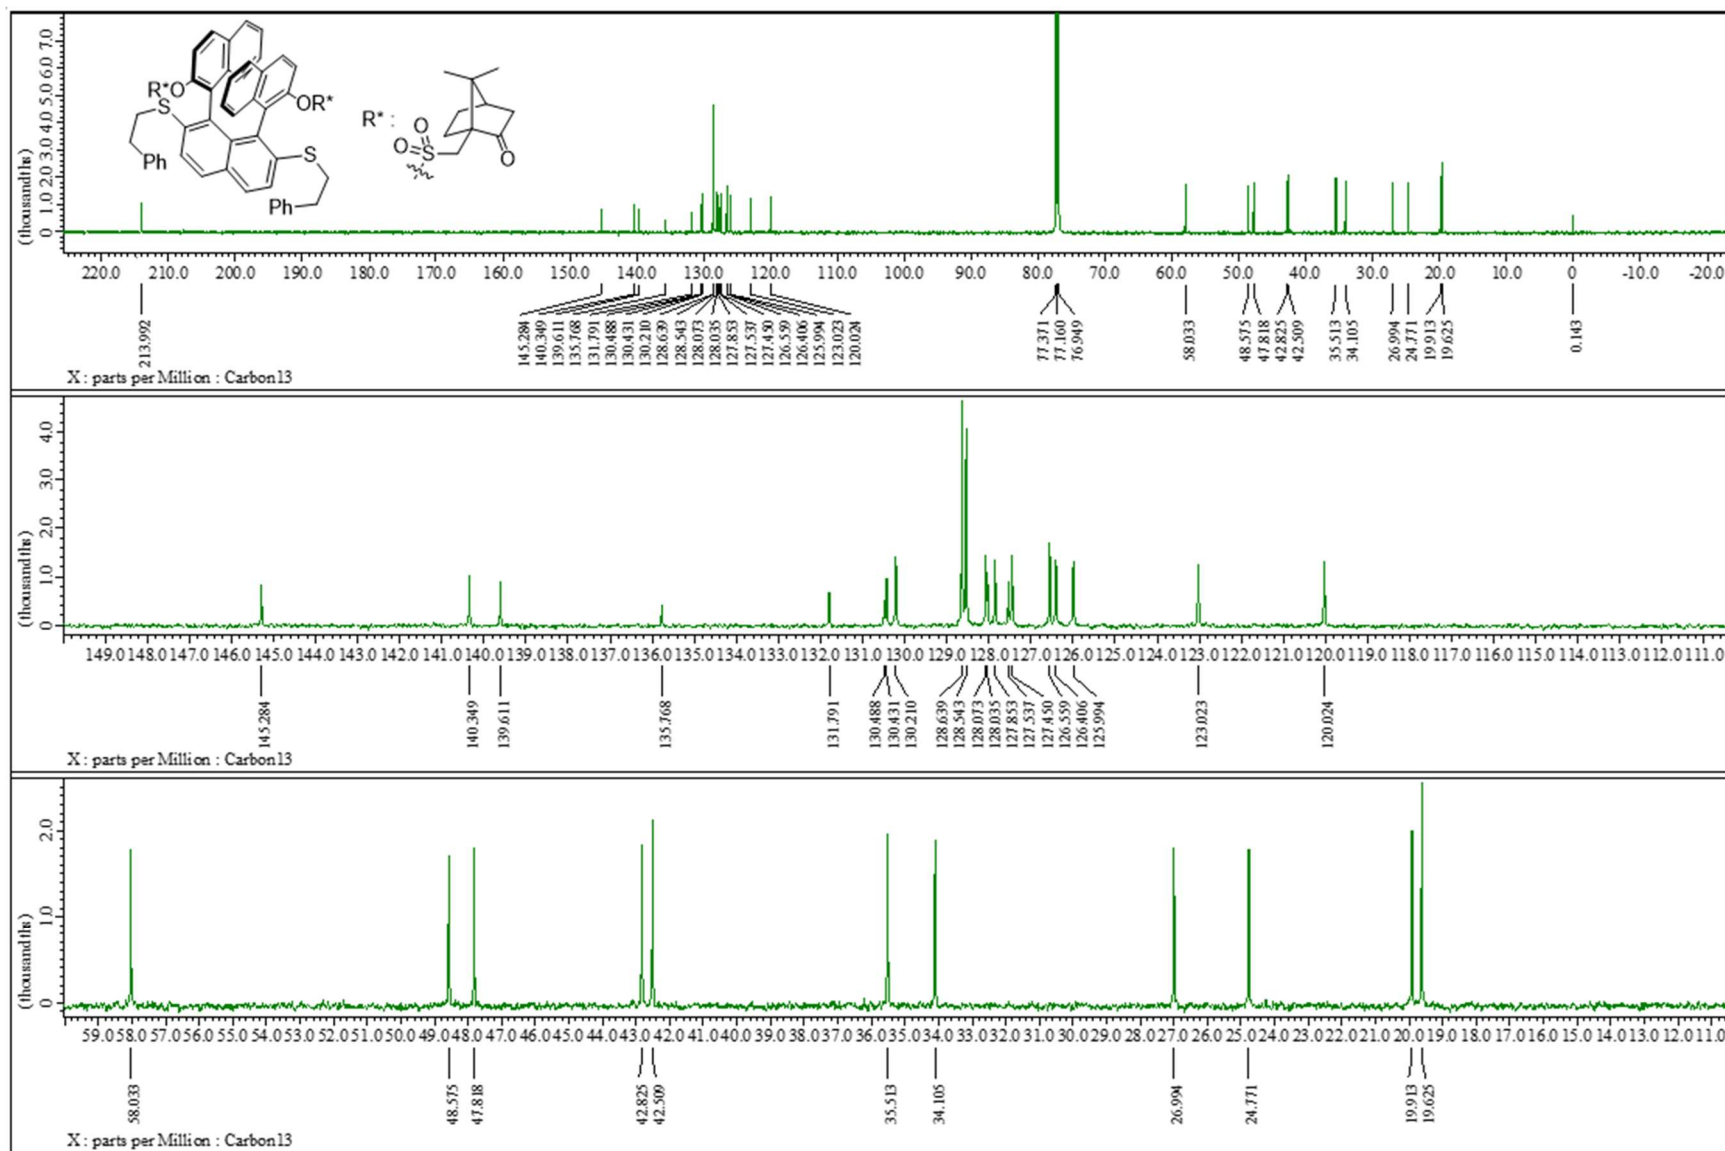

Fig. S47  $^{13}\text{C}$  NMR spectrum of ( $S_a,S_a$ )-4' in  $\text{CDCl}_3$ .

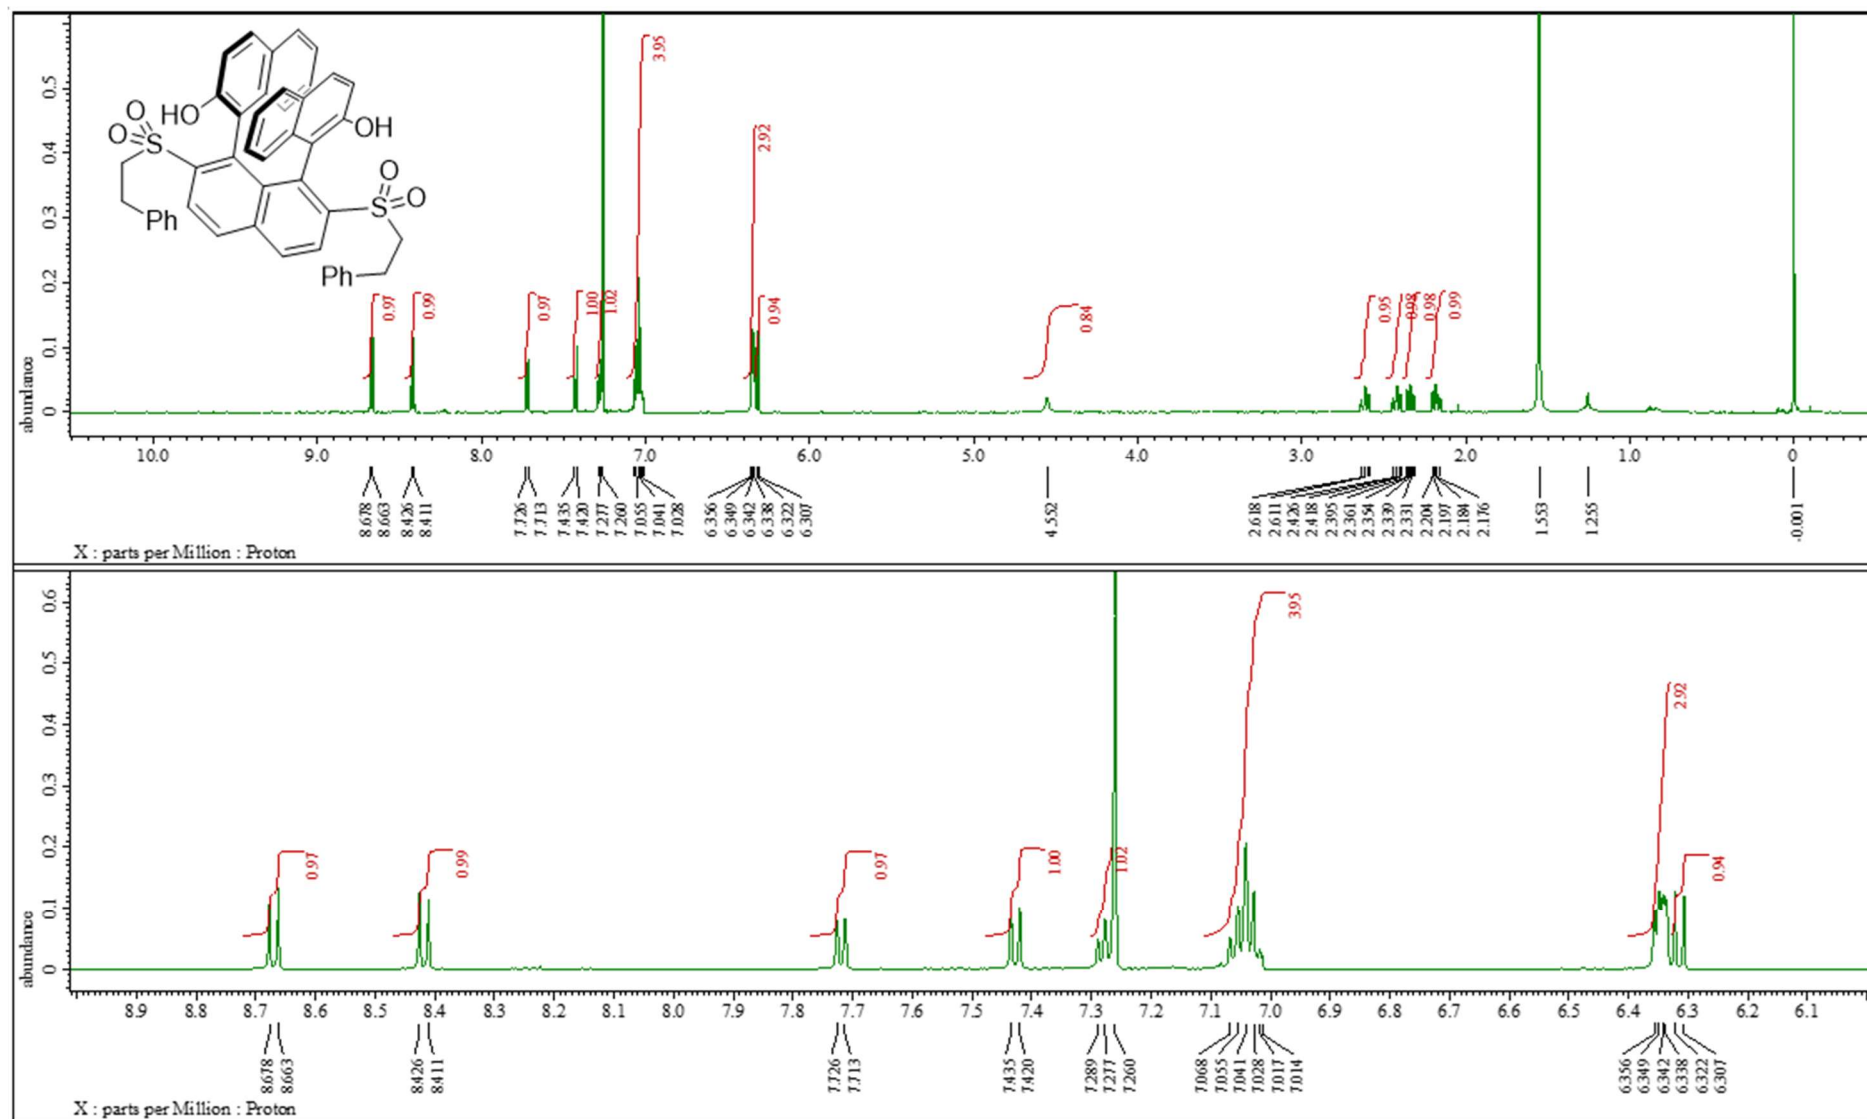

Fig. S48  $^1\text{H}$  NMR spectrum of (rac)-5 in  $\text{CDCl}_3$ .

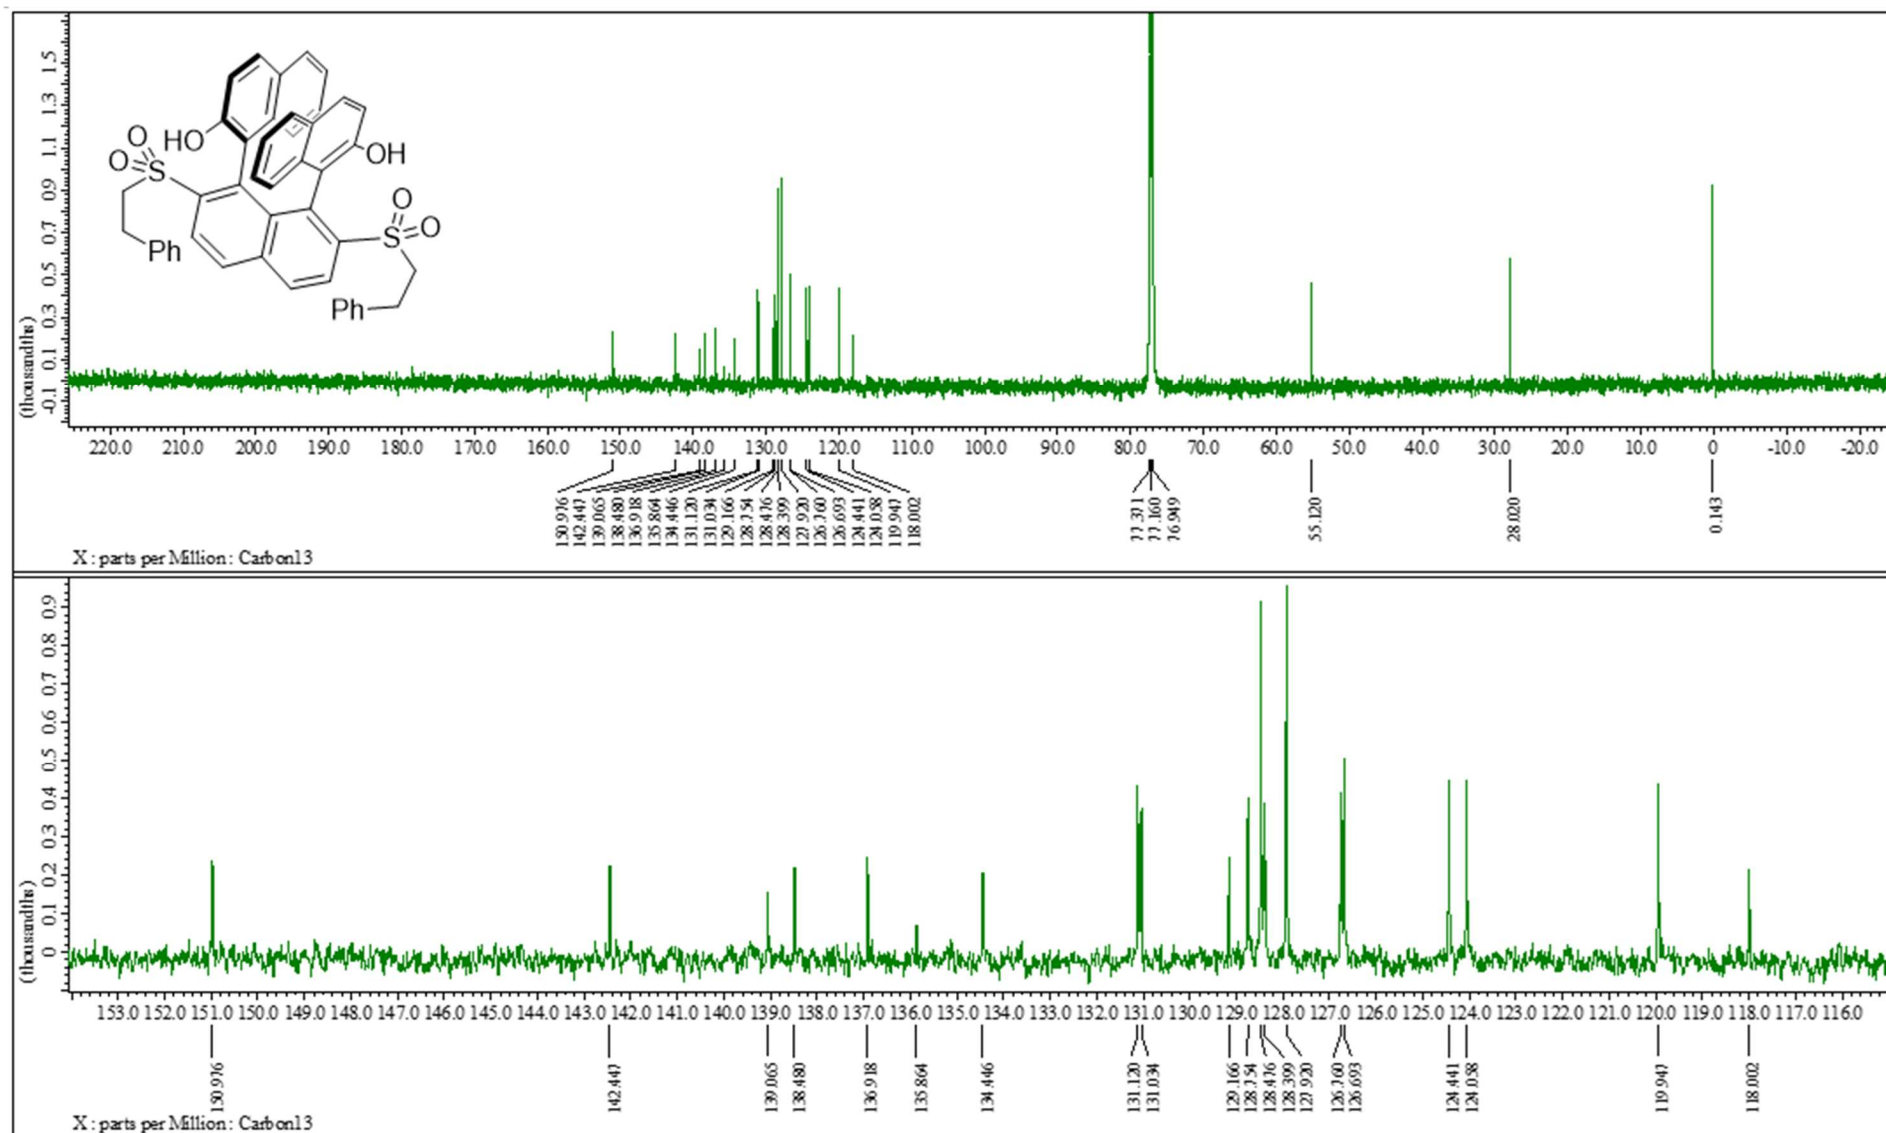

Fig. S49  $^{13}\text{C}$  NMR spectrum of *(rac)*-**5** in  $\text{CDCl}_3$ .

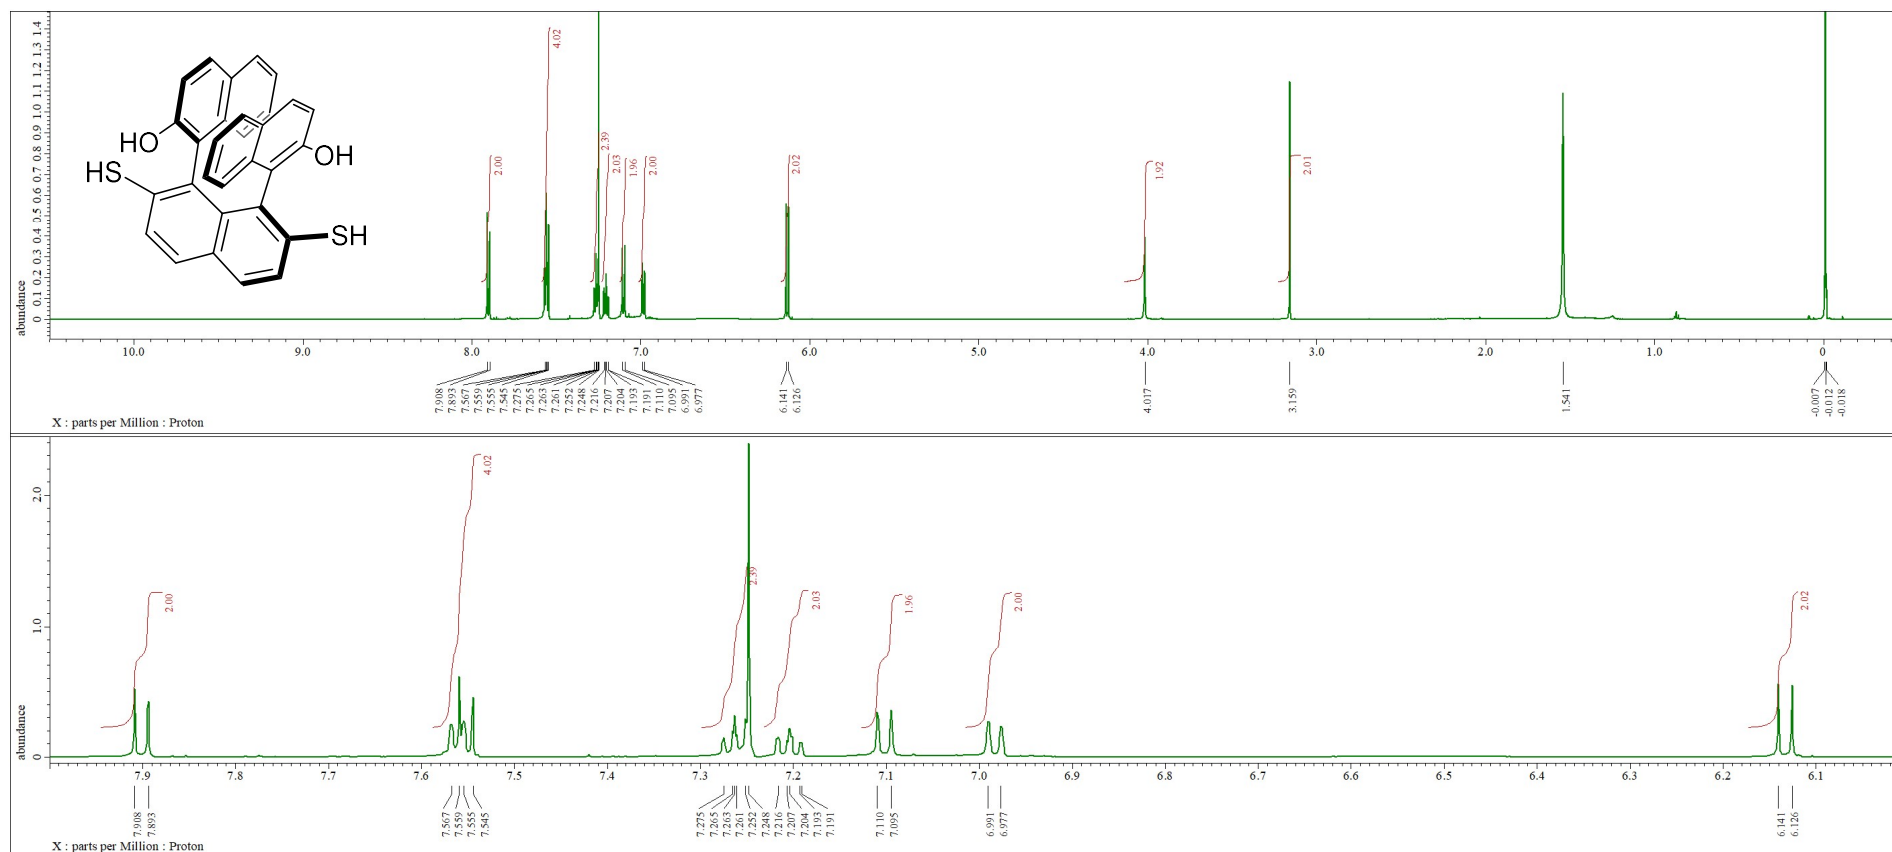

**Fig. S50**  $^1\text{H}$  NMR spectrum of *(rac)*-7 in  $\text{CDCl}_3$ .

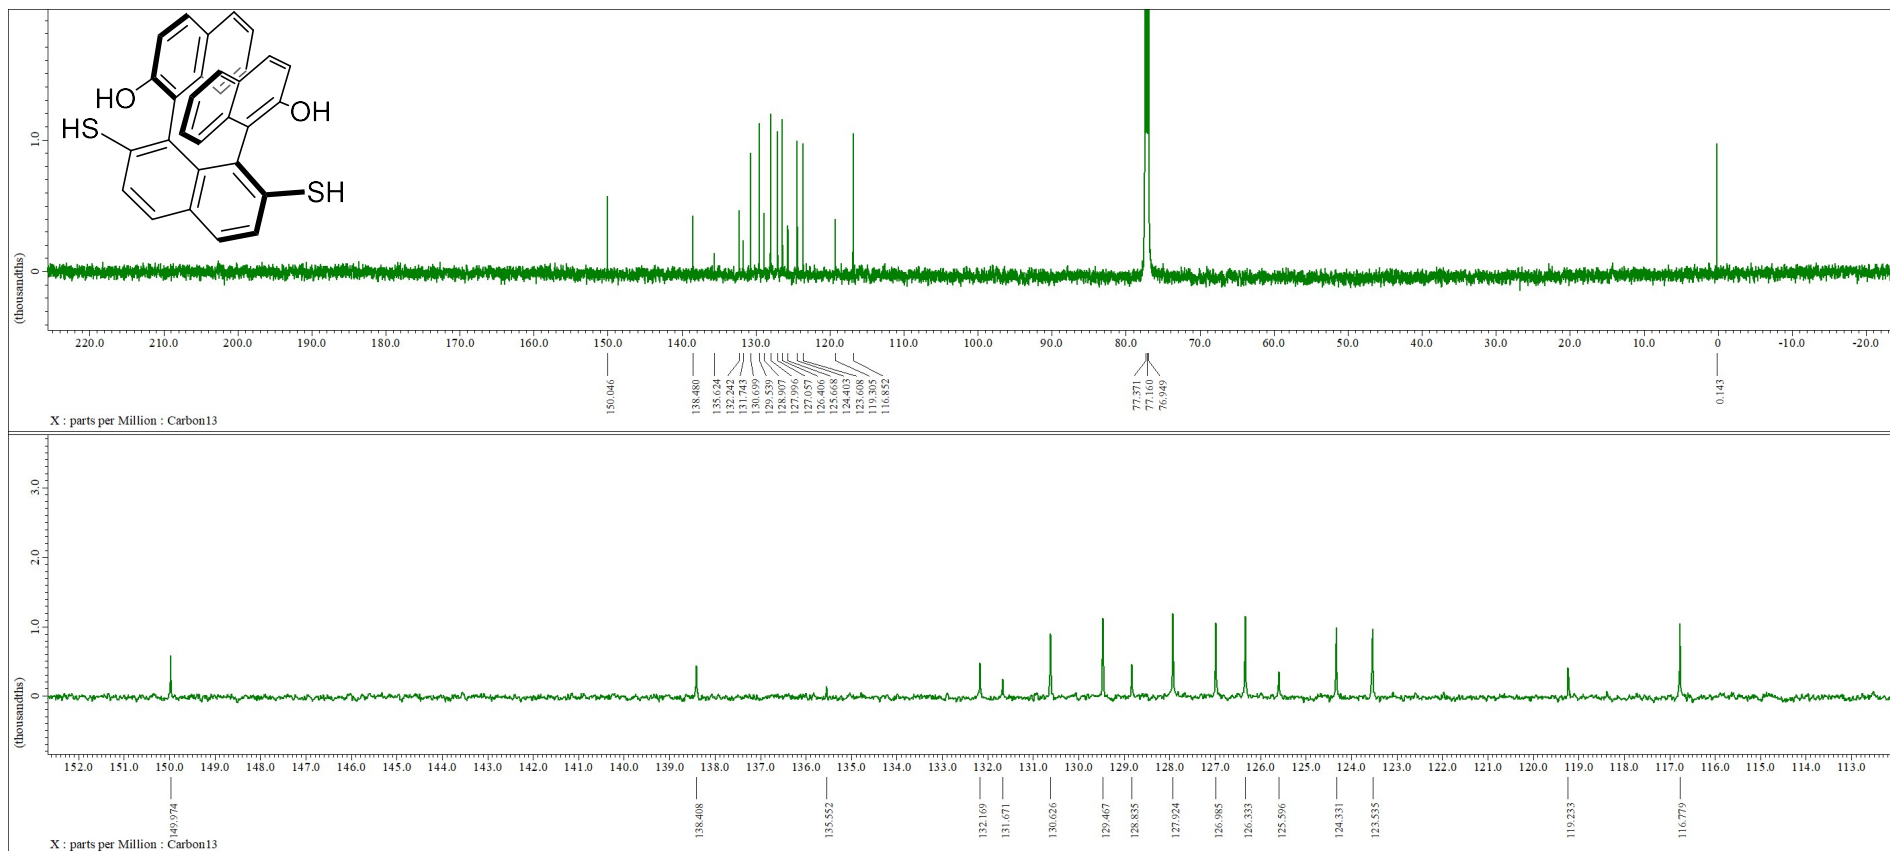

**Fig. S51**  $^{13}\text{C}$  NMR spectrum of *(rac)*-7 in  $\text{CDCl}_3$ .

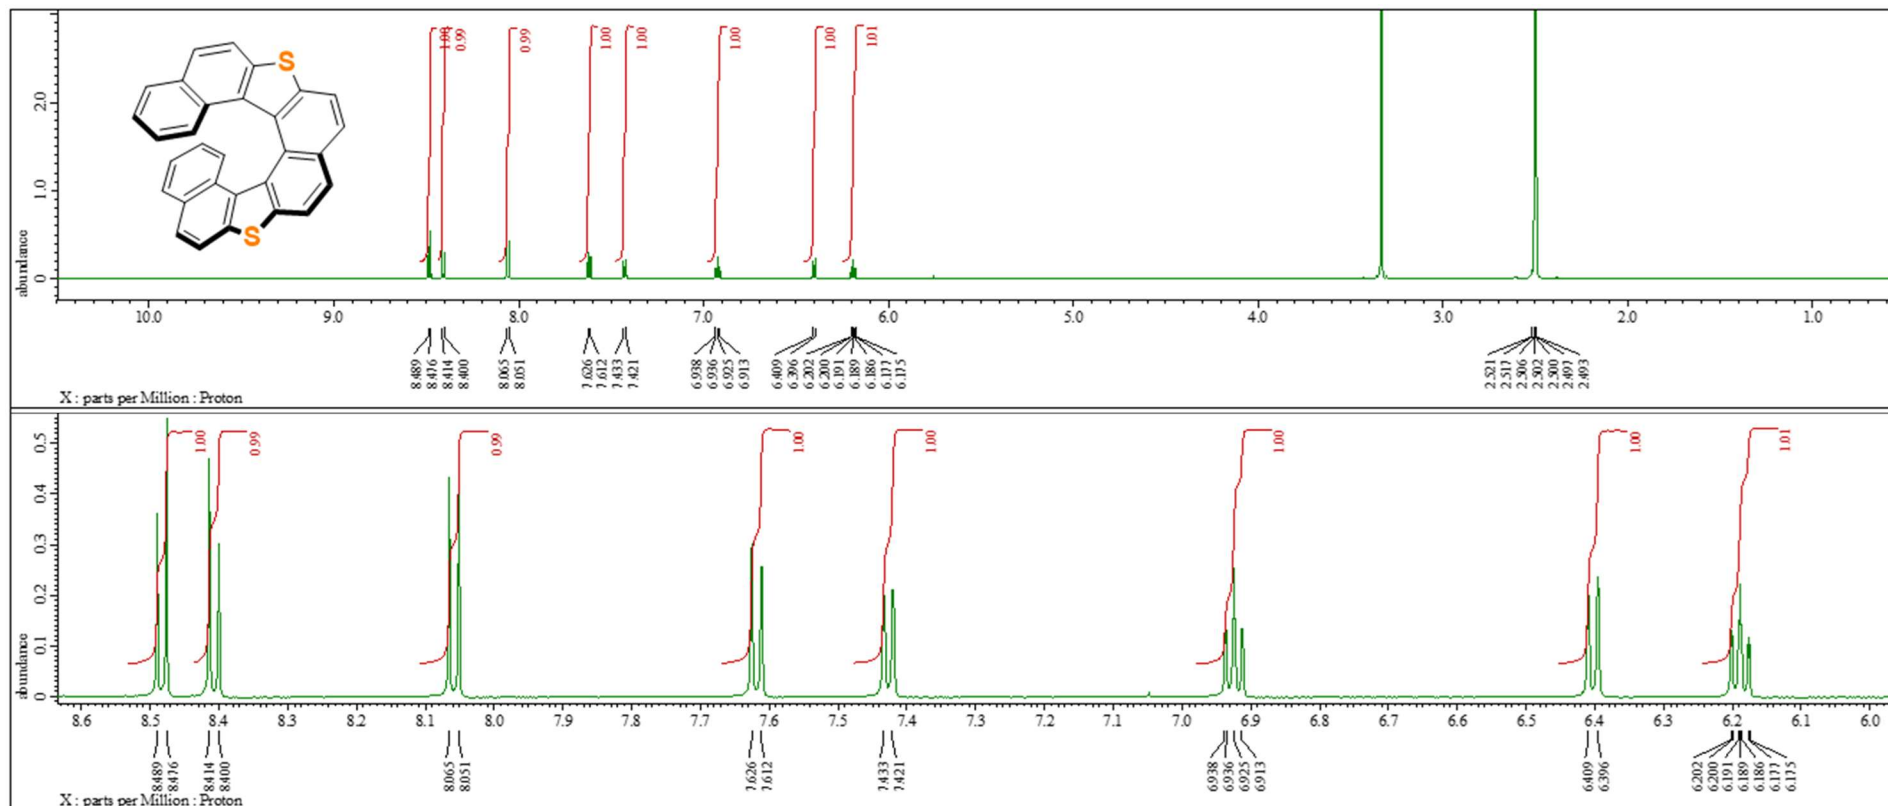

**Fig. S52**  $^1\text{H}$  NMR spectrum of *(rac)*-6S in  $\text{DMSO-}d_6$ .



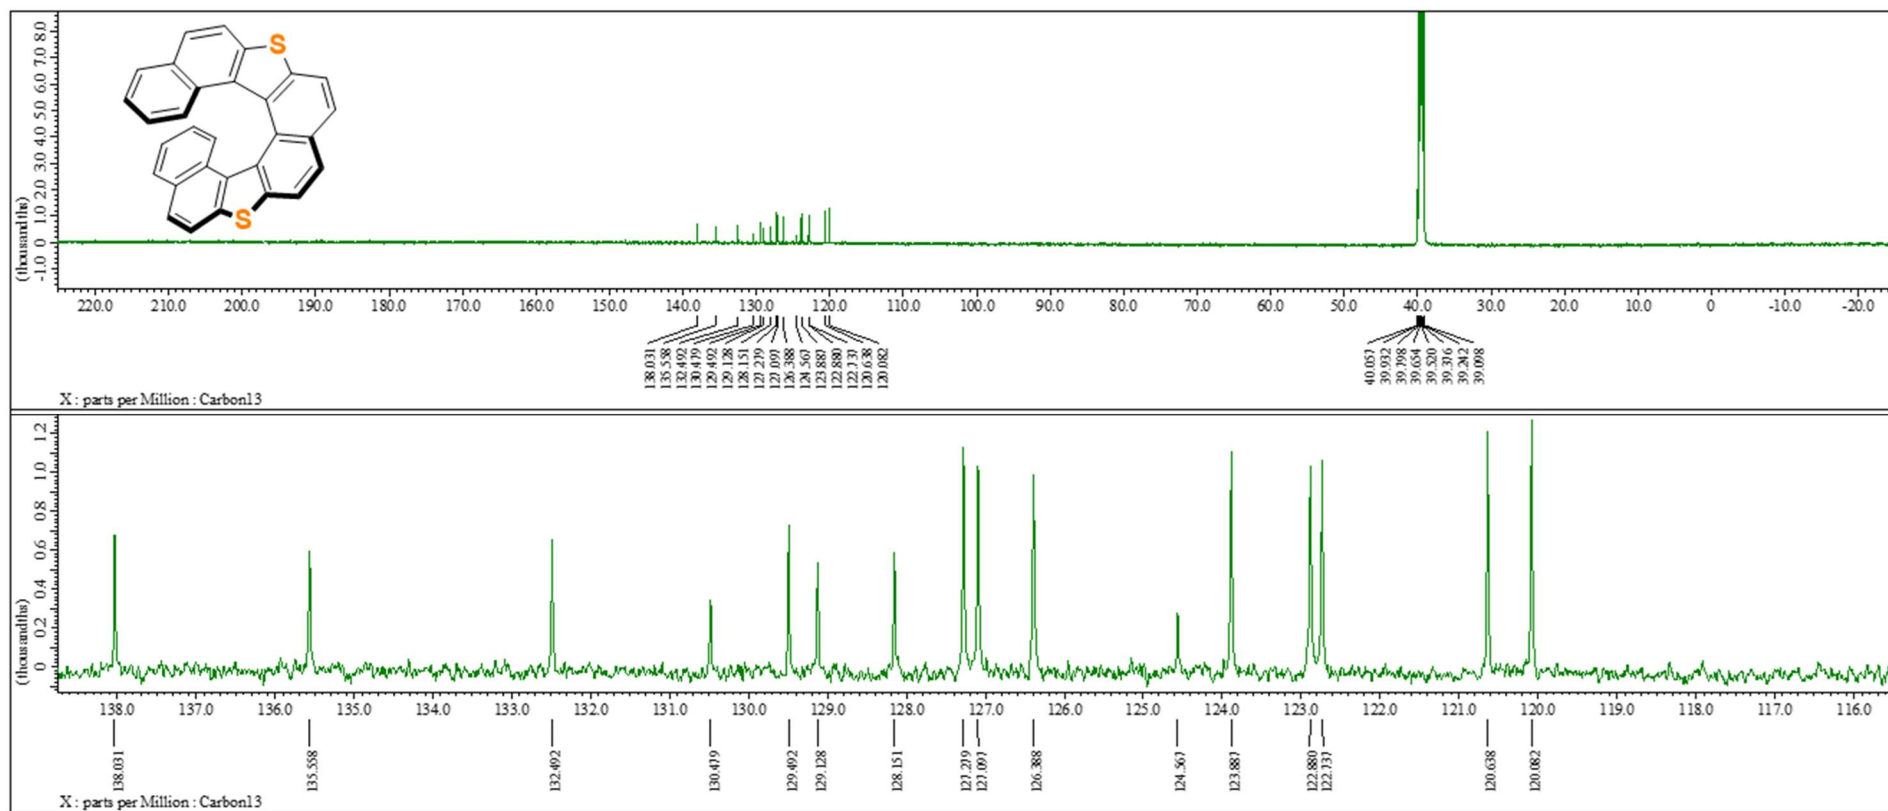

**Fig. S53**  $^{13}\text{C}$  NMR spectrum of *(rac)*-6S in  $\text{DMSO-}d_6$ .

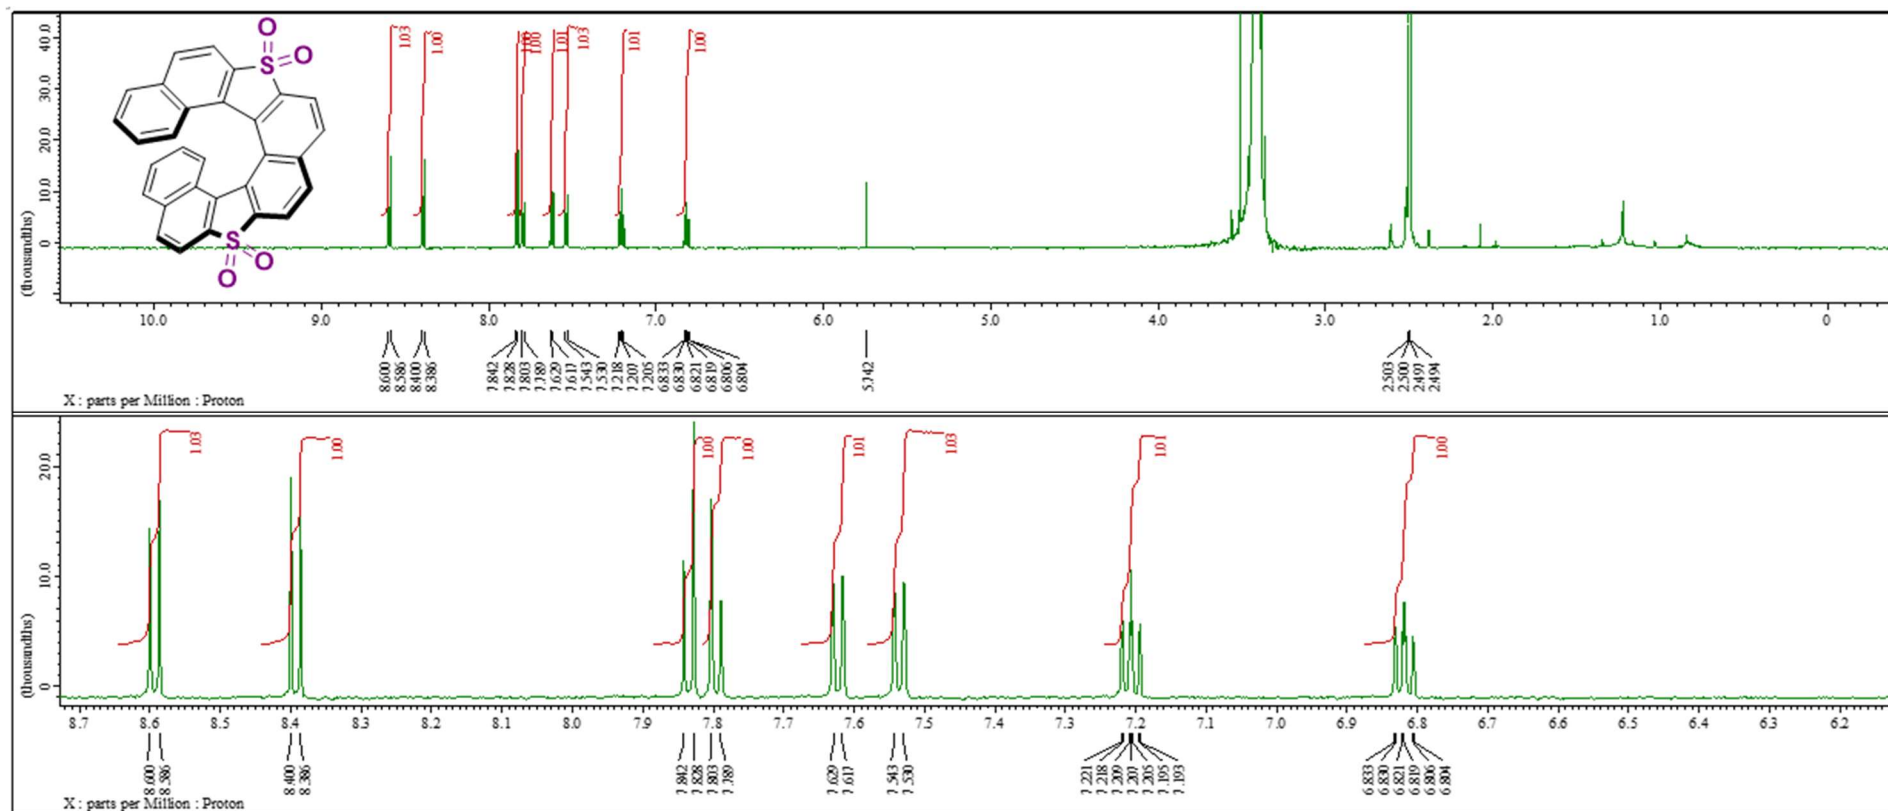

Fig. S54 <sup>1</sup>H NMR spectrum of (rac)-6SO<sub>2</sub> in DMSO-d<sub>6</sub>.

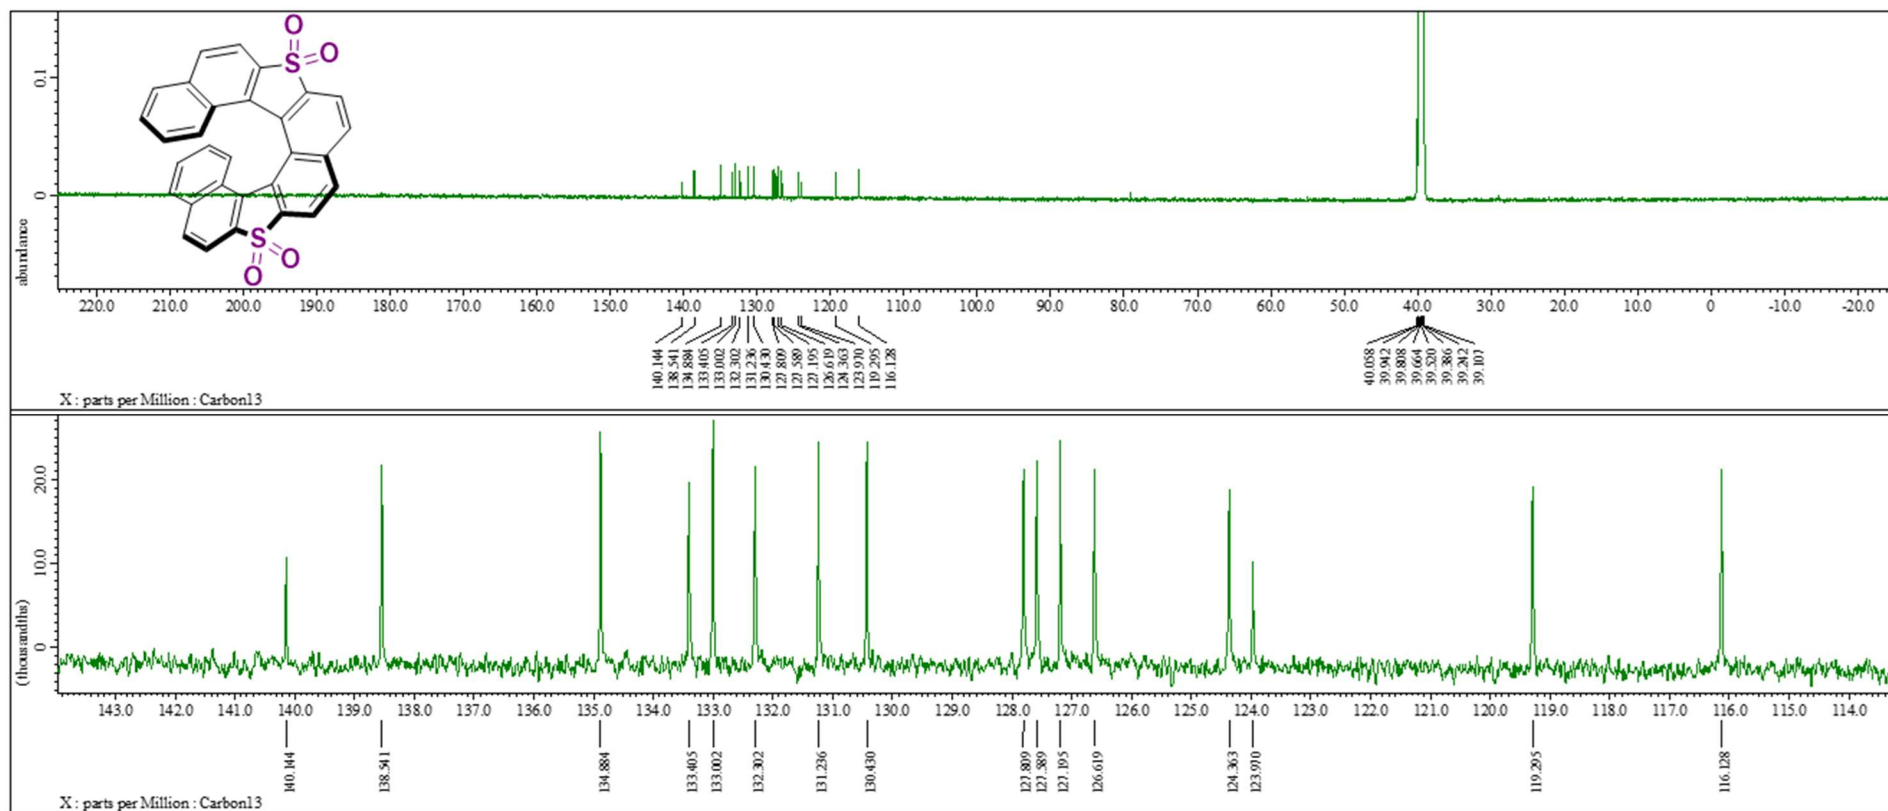

**Fig. S55**  $^{13}\text{C}$  NMR spectrum of *(rac)*-6SO<sub>2</sub> in DMSO-*d*<sub>6</sub>.

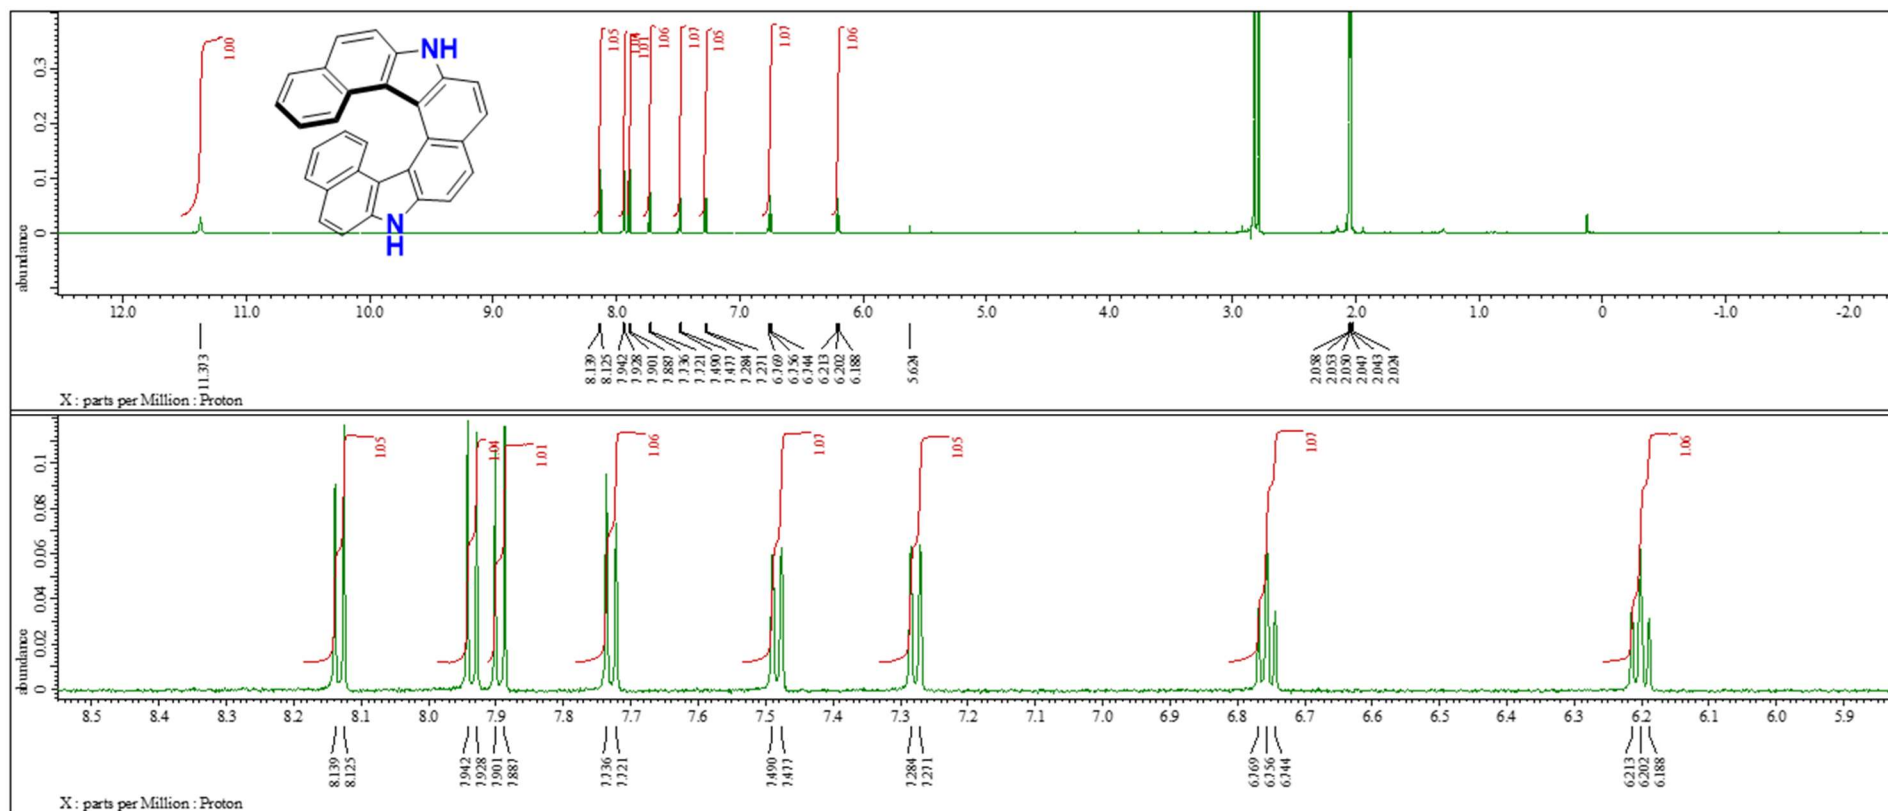

**Fig. S56**  $^1\text{H}$  NMR spectrum of *(rac)*-6N in  $\text{acetone-}d_6$ .

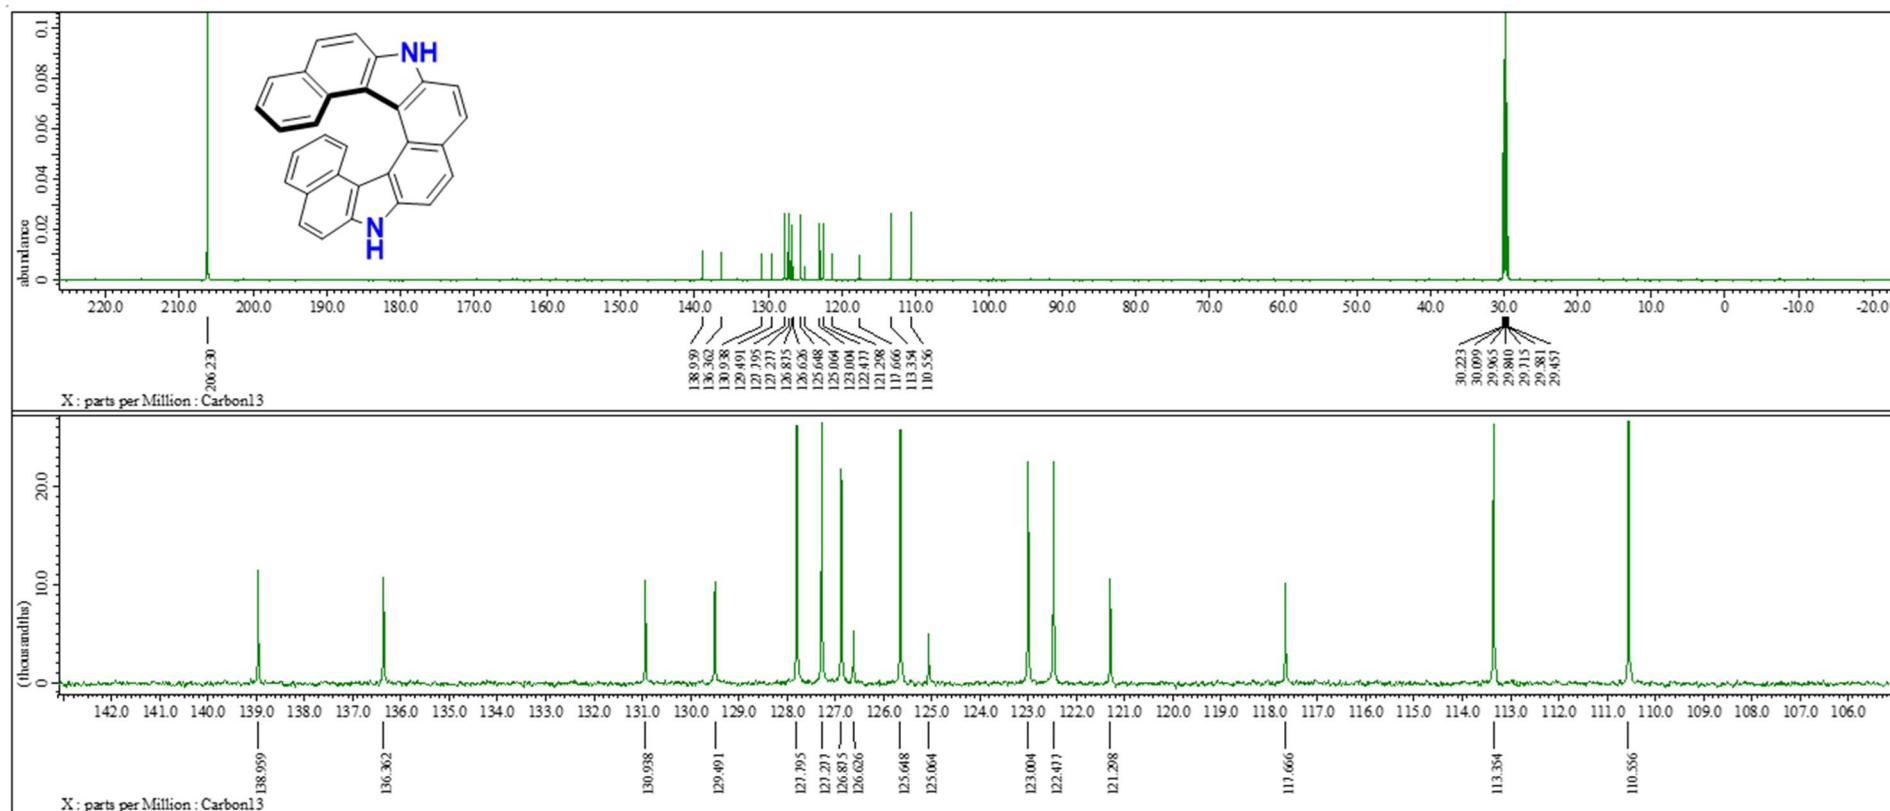

Fig. S57  $^{13}\text{C}$  NMR spectrum of *(rac)*-6N in acetone- $d_6$ .

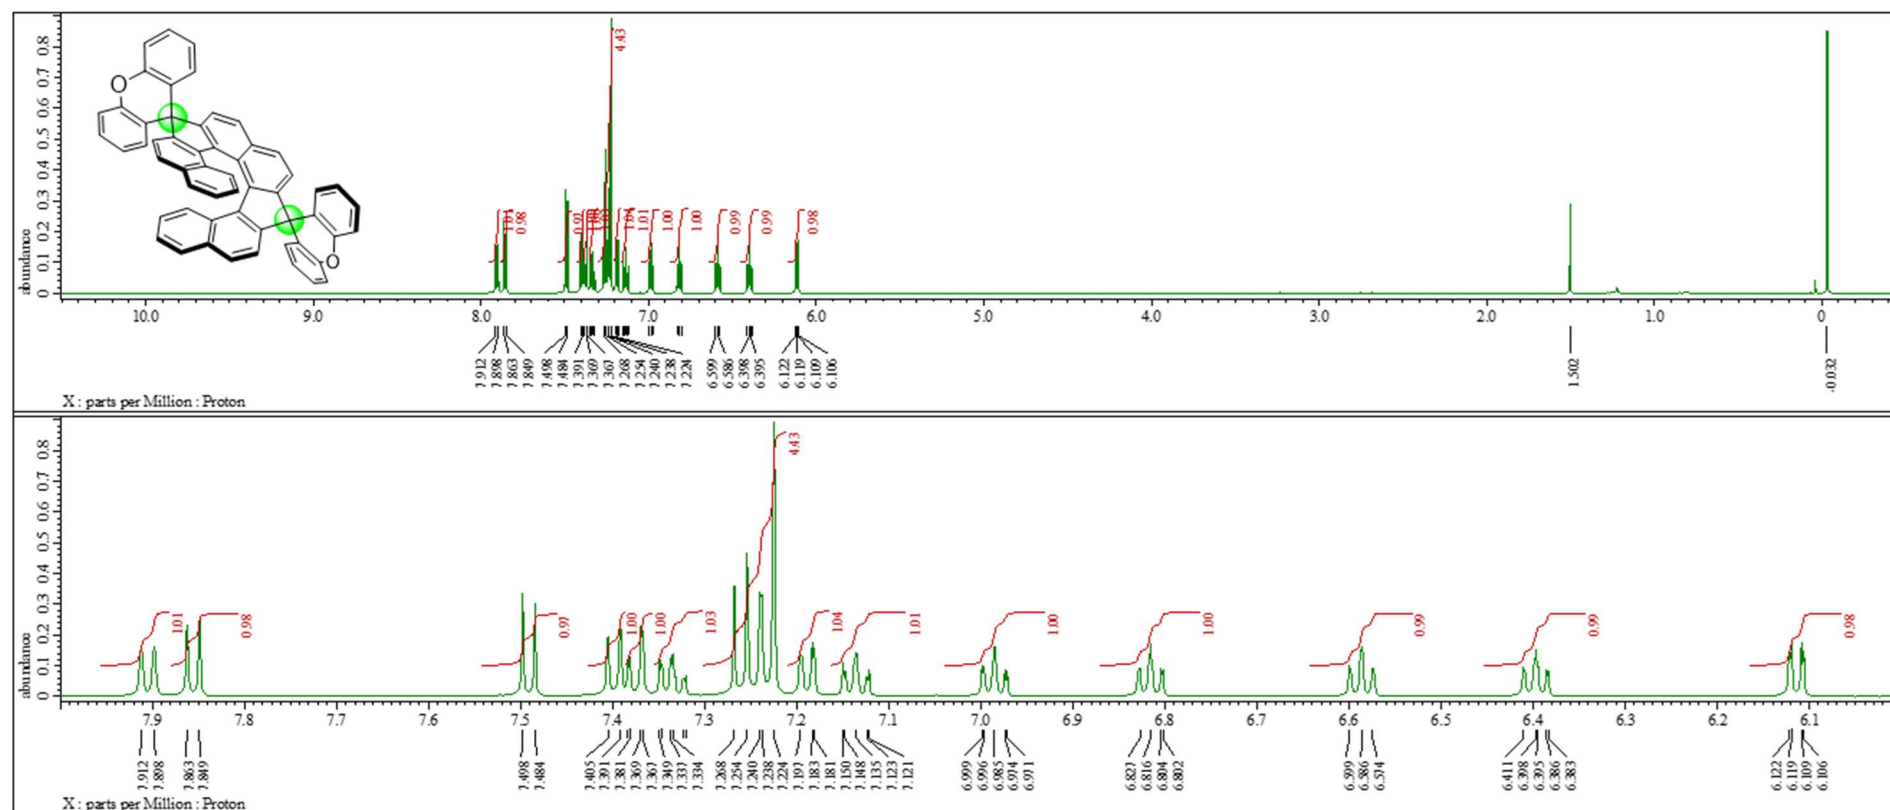

Fig. S58  $^1\text{H}$  NMR spectrum of *(rac)*-6CX in  $\text{CDCl}_3$ .

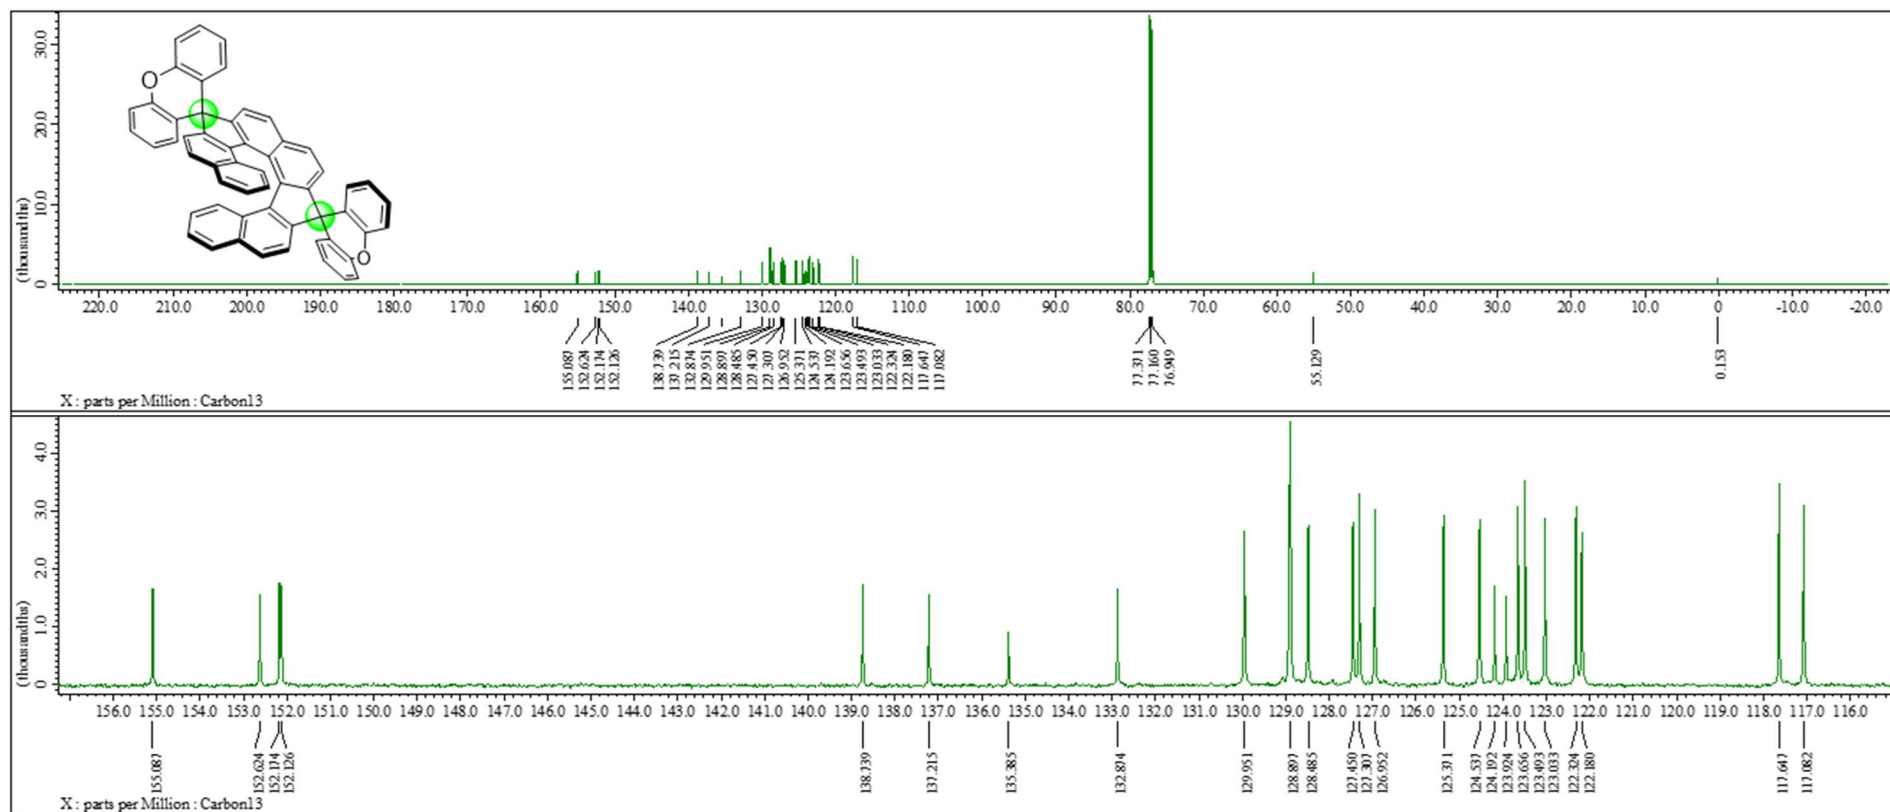

**Fig. S59**  $^{13}\text{C}$  NMR spectrum of *(rac)*-6CX in  $\text{CDCl}_3$ .

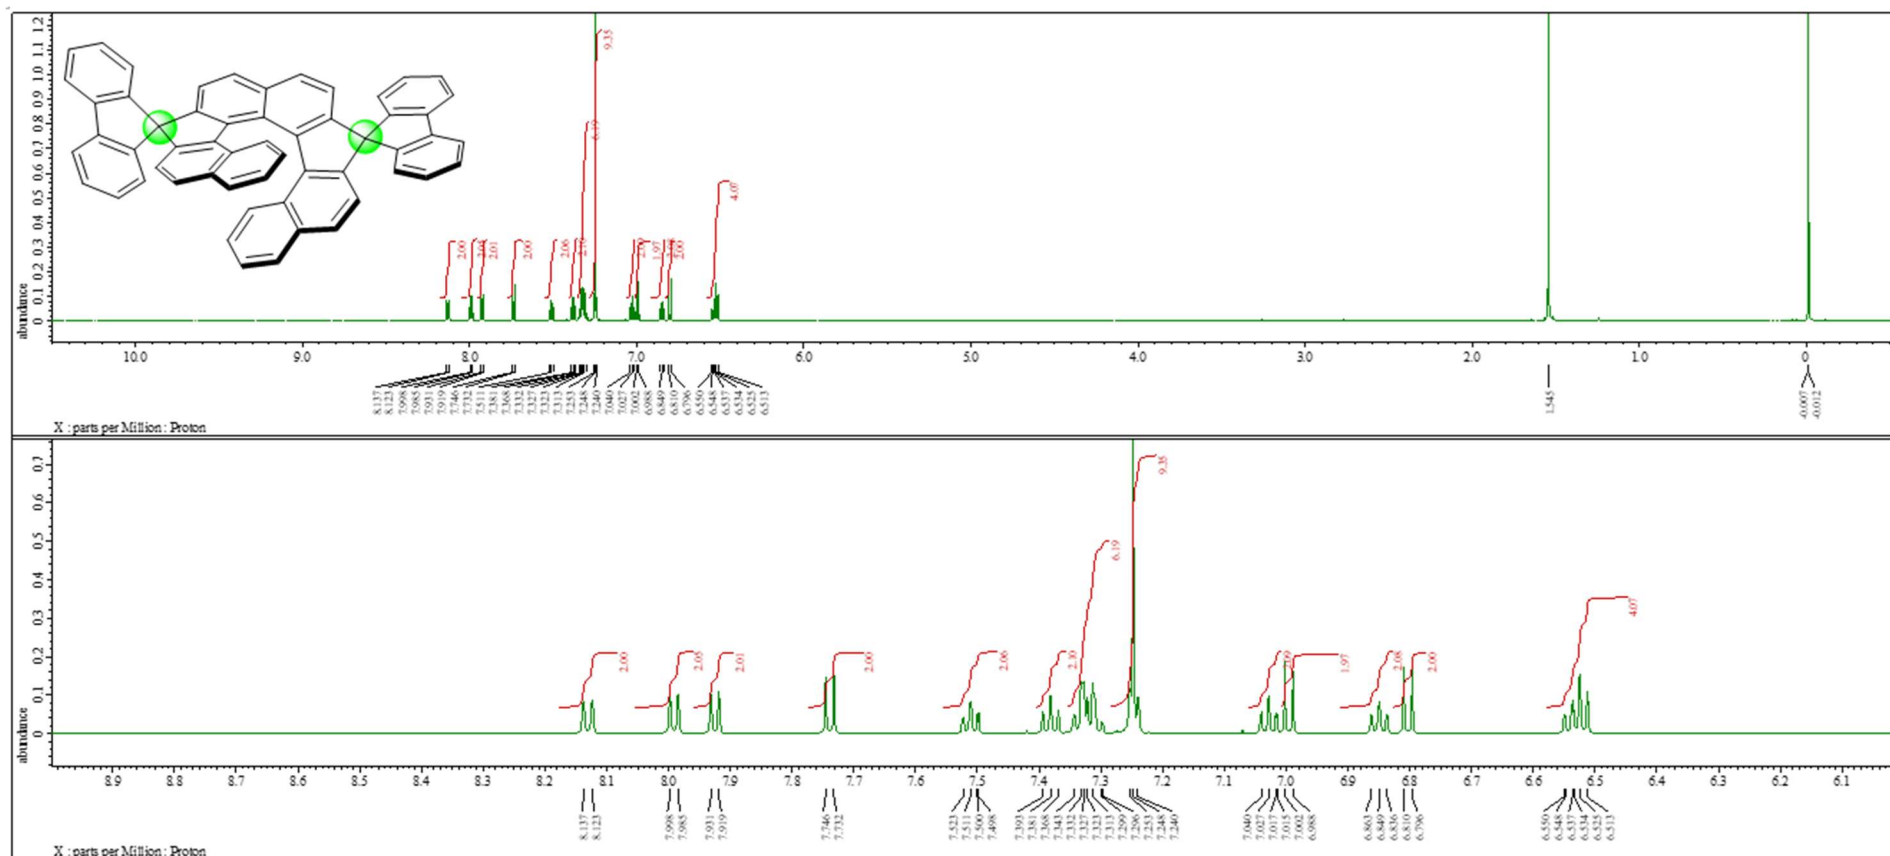

**Fig. S60**  $^1\text{H}$  NMR spectrum of *(rac)*-6CF in  $\text{CDCl}_3$ .



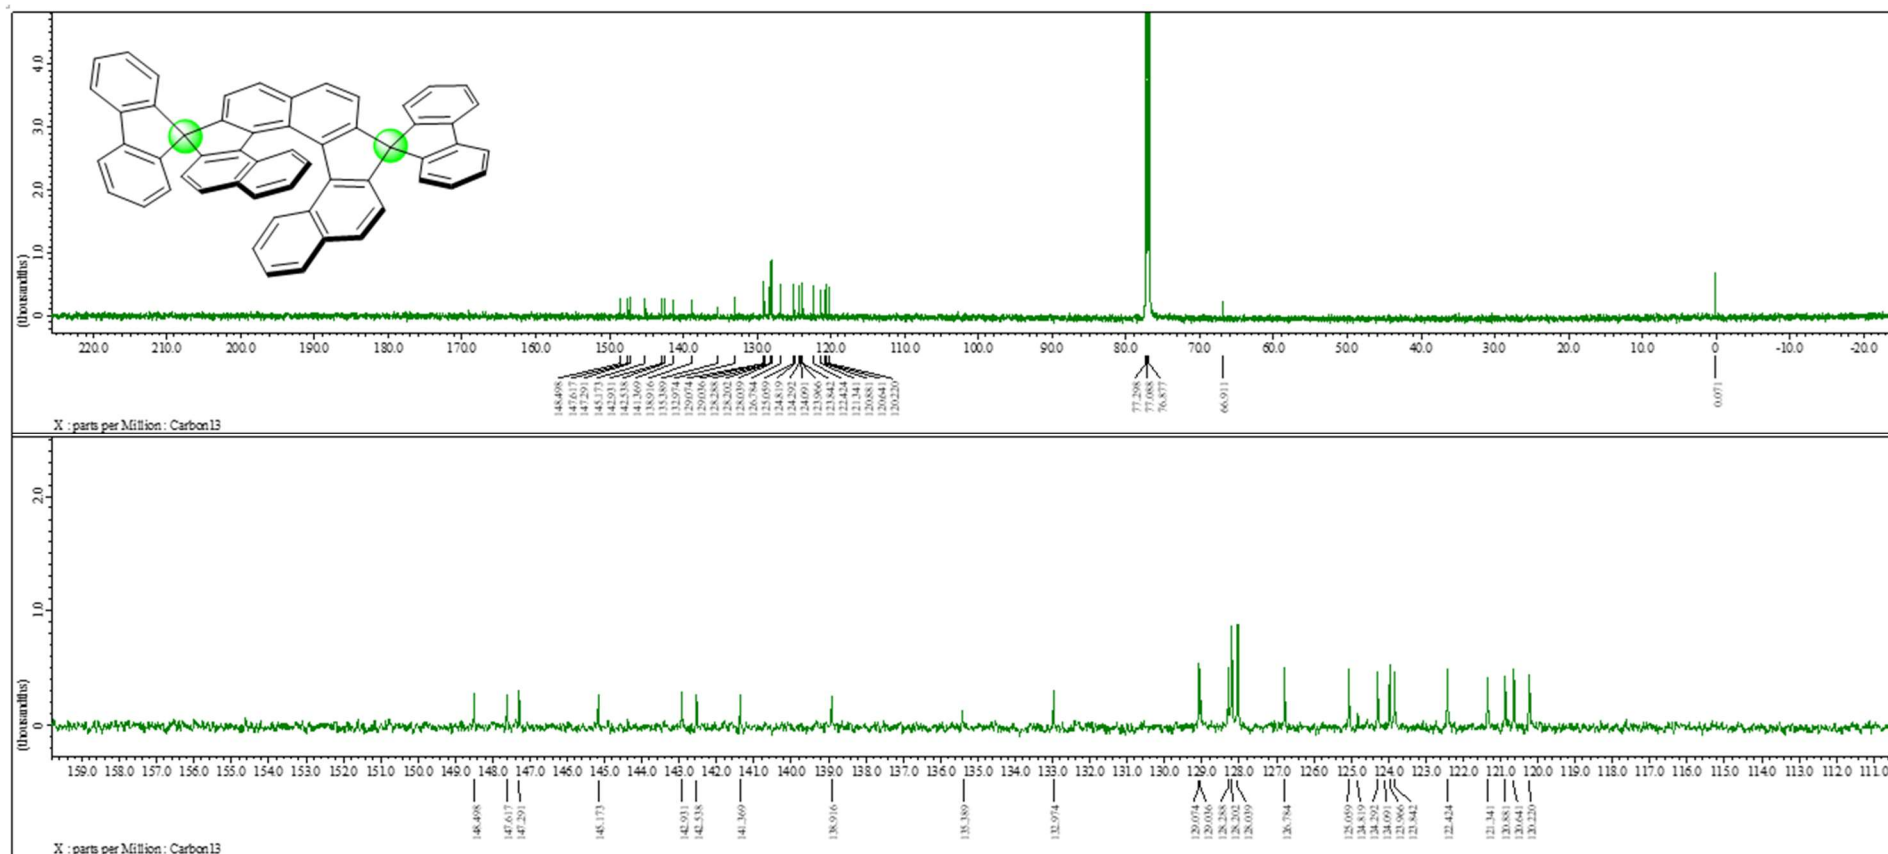

**Fig. S61**  $^{13}\text{C}$  NMR spectrum of *(rac)*-6CF in  $\text{CDCl}_3$ .
